# Supplementary material
Source: PubMed Central journal article supplement (PMC8491132)
Supplement: jama-e2118178-s005.pdf [file jama-e2118178-s005.pdf]

\*Indicates required information. Only first name, last name, and suffix will appear in PubMed.

| <b>*Group Name(s): REMAP-CAP Collaborators</b> |                   |                              |                  |             |                                          |                                                         |                                                                                            |
|------------------------------------------------|-------------------|------------------------------|------------------|-------------|------------------------------------------|---------------------------------------------------------|--------------------------------------------------------------------------------------------|
| <b>*First Name and Middle Initial(s)</b>       | <b>*Last Name</b> | <b>*Suffix (eg, Jr, III)</b> | Academic Degrees | Institution | Location (city, state/province, country) | Role or Contribution, eg, chair, principal investigator | Group (if more than 1 Group listed in the byline) and/or Subgroup (eg, Steering Committee) |
| Hesham                                         | Abdelhady         |                              |                  |             |                                          |                                                         |                                                                                            |
| Marwa                                          | Abdelrazik        |                              |                  |             |                                          |                                                         |                                                                                            |
| Zakee                                          | Abdi              |                              |                  |             |                                          |                                                         |                                                                                            |
| David                                          | Abdo              |                              |                  |             |                                          |                                                         |                                                                                            |
| Amina                                          | Abdulle           |                              |                  |             |                                          |                                                         |                                                                                            |
| Lynn                                           | Abel              |                              |                  |             |                                          |                                                         |                                                                                            |
| Shrefee                                        | Abouzeenni        |                              |                  |             |                                          |                                                         |                                                                                            |
| Gail                                           | Abrahamson        |                              |                  |             |                                          |                                                         |                                                                                            |
| Yousuf                                         | Abusamra          |                              |                  |             |                                          |                                                         |                                                                                            |
| Lisa                                           | Adams             |                              |                  |             |                                          |                                                         |                                                                                            |
| Olumide                                        | Adebambo          |                              |                  |             |                                          |                                                         |                                                                                            |
| Debo                                           | Ademokun          |                              |                  |             |                                          |                                                         |                                                                                            |
| Neill                                          | Adhikari          |                              |                  |             |                                          |                                                         |                                                                                            |
| Dominic                                        | Affron            |                              |                  |             |                                          |                                                         |                                                                                            |
| Anu                                            | Aggarwal          |                              |                  |             |                                          |                                                         |                                                                                            |
| Ronan                                          | Agno              |                              |                  |             |                                          |                                                         |                                                                                            |
| Humayun                                        | Ahmad             |                              |                  |             |                                          |                                                         |                                                                                            |
| Norfaizan                                      | Ahmad             |                              |                  |             |                                          |                                                         |                                                                                            |
| Sophia                                         | Ahmed             |                              |                  |             |                                          |                                                         |                                                                                            |
| Kate                                           | Ainscough         |                              |                  |             |                                          |                                                         |                                                                                            |
| James                                          | Ainsworth         |                              |                  |             |                                          |                                                         |                                                                                            |
| Giulia                                         | Airoldi           |                              |                  |             |                                          |                                                         |                                                                                            |
| Lindianne                                      | Aitken            |                              |                  |             |                                          |                                                         |                                                                                            |
| Francis                                        | Ajeneye           |                              |                  |             |                                          |                                                         |                                                                                            |
| Naim                                           | Akhtar            |                              |                  |             |                                          |                                                         |                                                                                            |
| Olajide                                        | Akinwumiju        |                              |                  |             |                                          |                                                         |                                                                                            |
| Manaf                                          | Al-Bayati         |                              |                  |             |                                          |                                                         |                                                                                            |
| Martin                                         | Albert            |                              |                  |             |                                          |                                                         |                                                                                            |
| Meera                                          | Alderman          |                              |                  |             |                                          |                                                         |                                                                                            |

Supplemental Online Content: Nonauthor Collaborators

\*Indicates required information. Only first name, last name, and suffix will appear in PubMed.

| *First Name and Middle Initial(s) | *Last Name    | *Suffix (eg, Jr, III) | Academic Degrees | Institution | Location (city, state/province, country) | Role or Contribution, eg, chair, principal investigator | Group (if more than 1 Group listed in the byline) and/or Subgroup (eg, Steering Committee) |
|-----------------------------------|---------------|-----------------------|------------------|-------------|------------------------------------------|---------------------------------------------------------|--------------------------------------------------------------------------------------------|
| Ana                               | Alegria       |                       |                  |             |                                          |                                                         |                                                                                            |
| Brian                             | Alexander     |                       |                  |             |                                          |                                                         |                                                                                            |
| Peter DG                          | Alexander     |                       |                  |             |                                          |                                                         |                                                                                            |
| Jordan                            | Alfonso       |                       |                  |             |                                          |                                                         |                                                                                            |
| Hoodo                             | Ali           |                       |                  |             |                                          |                                                         |                                                                                            |
| Sabira                            | Ali           |                       |                  |             |                                          |                                                         |                                                                                            |
| Allameddine                       | Allameddine   |                       |                  |             |                                          |                                                         |                                                                                            |
| Sheila                            | Allan         |                       |                  |             |                                          |                                                         |                                                                                            |
| Isabelle                          | Allard        |                       |                  |             |                                          |                                                         |                                                                                            |
| Barbara                           | Allen         |                       |                  |             |                                          |                                                         |                                                                                            |
| Beverley                          | Allen         |                       |                  |             |                                          |                                                         |                                                                                            |
| Jess                              | Allen         |                       |                  |             |                                          |                                                         |                                                                                            |
| Laura                             | Allen         |                       |                  |             |                                          |                                                         |                                                                                            |
| Louise                            | Allen         |                       |                  |             |                                          |                                                         |                                                                                            |
| Louise                            | Allen         |                       |                  |             |                                          |                                                         |                                                                                            |
| Suzanne                           | Allibone      |                       |                  |             |                                          |                                                         |                                                                                            |
| Richard                           | Ambrosino     |                       |                  |             |                                          |                                                         |                                                                                            |
| Kenneth                           | Amenyah       |                       |                  |             |                                          |                                                         |                                                                                            |
| Mariam                            | Ammoun        |                       |                  |             |                                          |                                                         |                                                                                            |
| Rekha                             | Anand         |                       |                  |             |                                          |                                                         |                                                                                            |
| Sai Priya                         | Anand         |                       |                  |             |                                          |                                                         |                                                                                            |
| Kristen                           | Andersen      |                       |                  |             |                                          |                                                         |                                                                                            |
| Corinne                           | Anderson      |                       |                  |             |                                          |                                                         |                                                                                            |
| Kevin                             | Anderson      |                       |                  |             |                                          |                                                         |                                                                                            |
| Thomas                            | Anderson      |                       |                  |             |                                          |                                                         |                                                                                            |
| Mark                              | Andreae       |                       |                  |             |                                          |                                                         |                                                                                            |
| Susan                             | Andrews       |                       |                  |             |                                          |                                                         |                                                                                            |
| Gregory                           | Andrikopoulos |                       |                  |             |                                          |                                                         |                                                                                            |
| Aisha                             | Anjum         |                       |                  |             |                                          |                                                         |                                                                                            |
| Matthew                           | Anstey        |                       |                  |             |                                          |                                                         |                                                                                            |
| Micheline                         | Antar         |                       |                  |             |                                          |                                                         |                                                                                            |

Supplemental Online Content: Nonauthor Collaborators

\*Indicates required information. Only first name, last name, and suffix will appear in PubMed.

| *First Name and Middle Initial(s) | *Last Name       | *Suffix (eg, Jr, III) | Academic Degrees | Institution | Location (city, state/province, country) | Role or Contribution, eg, chair, principal investigator | Group (if more than 1 Group listed in the byline) and/or Subgroup (eg, Steering Committee) |
|-----------------------------------|------------------|-----------------------|------------------|-------------|------------------------------------------|---------------------------------------------------------|--------------------------------------------------------------------------------------------|
| David                             | Antcliffe        |                       |                  |             |                                          |                                                         |                                                                                            |
| Alpha                             | Anthony          |                       |                  |             |                                          |                                                         |                                                                                            |
| Pierre                            | Antoine          |                       |                  |             |                                          |                                                         |                                                                                            |
| Vikram                            | Anumakonda       |                       |                  |             |                                          |                                                         |                                                                                            |
| George                            | Apostolides      |                       |                  |             |                                          |                                                         |                                                                                            |
| Latha                             | Aravindan        |                       |                  |             |                                          |                                                         |                                                                                            |
| Gill                              | Arbane           |                       |                  |             |                                          |                                                         |                                                                                            |
| Emily                             | Arbon            |                       |                  |             |                                          |                                                         |                                                                                            |
| Simon                             | Archer           |                       |                  |             |                                          |                                                         |                                                                                            |
| Noah                              | Aref             |                       |                  |             |                                          |                                                         |                                                                                            |
| Ana-Marie                         | Arias            |                       |                  |             |                                          |                                                         |                                                                                            |
| Chantal                           | Armalı           |                       |                  |             |                                          |                                                         |                                                                                            |
| Joel                              | Armer-Ducker     |                       |                  |             |                                          |                                                         |                                                                                            |
| Michelle                          | Armstrong        |                       |                  |             |                                          |                                                         |                                                                                            |
| Sylvia                            | Armstrong-Fisher |                       |                  |             |                                          |                                                         |                                                                                            |
| John                              | Arnold           |                       |                  |             |                                          |                                                         |                                                                                            |
| Sarah                             | Arnott           |                       |                  |             |                                          |                                                         |                                                                                            |
| Andrea                            | Arroyo           |                       |                  |             |                                          |                                                         |                                                                                            |
| Valérie                           | Arsenault        |                       |                  |             |                                          |                                                         |                                                                                            |
| Diptesh                           | Aryal            |                       |                  |             |                                          |                                                         |                                                                                            |
| Adeeba                            | Asghar           |                       |                  |             |                                          |                                                         |                                                                                            |
| Glen                              | Ashby            |                       |                  |             |                                          |                                                         |                                                                                            |
| Deborah                           | Asher            |                       |                  |             |                                          |                                                         |                                                                                            |
| Ben                               | Ashford          |                       |                  |             |                                          |                                                         |                                                                                            |
| Suhail                            | Ashgar           |                       |                  |             |                                          |                                                         |                                                                                            |
| Murtaza                           | Asif Ali         |                       |                  |             |                                          |                                                         |                                                                                            |
| Angelique                         | Aspinwall        |                       |                  |             |                                          |                                                         |                                                                                            |
| Abigail                           | Asquith          |                       |                  |             |                                          |                                                         |                                                                                            |
| Tanya                             | Atallah          |                       |                  |             |                                          |                                                         |                                                                                            |
| Richard                           | Athay-Hunt       |                       |                  |             |                                          |                                                         |                                                                                            |
| Udara                             | Attanayaka       |                       |                  |             |                                          |                                                         |                                                                                            |

Supplemental Online Content: Nonauthor Collaborators

\*Indicates required information. Only first name, last name, and suffix will appear in PubMed.

| *First Name and Middle Initial(s) | *Last Name     | *Suffix (eg, Jr, III) | Academic Degrees | Institution | Location (city, state/province, country) | Role or Contribution, eg, chair, principal investigator | Group (if more than 1 Group listed in the byline) and/or Subgroup (eg, Steering Committee) |
|-----------------------------------|----------------|-----------------------|------------------|-------------|------------------------------------------|---------------------------------------------------------|--------------------------------------------------------------------------------------------|
| Rita                              | Atugonza       |                       |                  |             |                                          |                                                         |                                                                                            |
| Michelle                          | Aube           |                       |                  |             |                                          |                                                         |                                                                                            |
| Marie-Christine                   | Auclair        |                       |                  |             |                                          |                                                         |                                                                                            |
| Karen                             | Austin         |                       |                  |             |                                          |                                                         |                                                                                            |
| Pauline                           | Austin         |                       |                  |             |                                          |                                                         |                                                                                            |
| Sidra                             | Awan           |                       |                  |             |                                          |                                                         |                                                                                            |
| Gina                              | Bacon          |                       |                  |             |                                          |                                                         |                                                                                            |
| Harleen                           | Badhesha       |                       |                  |             |                                          |                                                         |                                                                                            |
| Kavitha                           | Bagavathy      |                       |                  |             |                                          |                                                         |                                                                                            |
| Dawn                              | Baglole        |                       |                  |             |                                          |                                                         |                                                                                            |
| Clariza                           | Bagnas         |                       |                  |             |                                          |                                                         |                                                                                            |
| Catherine                         | Bagot          |                       |                  |             |                                          |                                                         |                                                                                            |
| Sean                              | Bagshaw        |                       |                  |             |                                          |                                                         |                                                                                            |
| Nadia                             | Baig           |                       |                  |             |                                          |                                                         |                                                                                            |
| Stephen                           | Bailey         |                       |                  |             |                                          |                                                         |                                                                                            |
| Kenneth                           | Baillie        |                       |                  |             |                                          |                                                         |                                                                                            |
| William                           | Bain           |                       |                  |             |                                          |                                                         |                                                                                            |
| Sanchia                           | Baines         |                       |                  |             |                                          |                                                         |                                                                                            |
| Aimi                              | Baird          |                       |                  |             |                                          |                                                         |                                                                                            |
| Charles                           | Baker          |                       |                  |             |                                          |                                                         |                                                                                            |
| Evelyn                            | Baker          |                       |                  |             |                                          |                                                         |                                                                                            |
| Penny                             | Bakhtiari      |                       |                  |             |                                          |                                                         |                                                                                            |
| Dhanalakshmi                      | Bakthavatsalam |                       |                  |             |                                          |                                                         |                                                                                            |
| Morteza                           | Balaie         |                       |                  |             |                                          |                                                         |                                                                                            |
| Gagan                             | Bali           |                       |                  |             |                                          |                                                         |                                                                                            |
| Sonya                             | Balkee         |                       |                  |             |                                          |                                                         |                                                                                            |
| Amy                               | Ballinger      |                       |                  |             |                                          |                                                         |                                                                                            |
| Amy                               | Bamford        |                       |                  |             |                                          |                                                         |                                                                                            |
| Peter                             | Bamford        |                       |                  |             |                                          |                                                         |                                                                                            |
| Millie                            | Banerjee       |                       |                  |             |                                          |                                                         |                                                                                            |
| Lauren                            | Banks          |                       |                  |             |                                          |                                                         |                                                                                            |

Supplemental Online Content: Nonauthor Collaborators

\*Indicates required information. Only first name, last name, and suffix will appear in PubMed.

| *First Name and Middle Initial(s) | *Last Name    | *Suffix (eg, Jr, III) | Academic Degrees | Institution | Location (city, state/province, country) | Role or Contribution, eg, chair, principal investigator | Group (if more than 1 Group listed in the byline) and/or Subgroup (eg, Steering Committee) |
|-----------------------------------|---------------|-----------------------|------------------|-------------|------------------------------------------|---------------------------------------------------------|--------------------------------------------------------------------------------------------|
| Jonathan                          | Bannard-Smith |                       |                  |             |                                          |                                                         |                                                                                            |
| Nancy                             | Banning       |                       |                  |             |                                          |                                                         |                                                                                            |
| Bharat                            | Bansal        |                       |                  |             |                                          |                                                         |                                                                                            |
| Robert                            | Banthorpe     |                       |                  |             |                                          |                                                         |                                                                                            |
| Ian                               | Barbash       |                       |                  |             |                                          |                                                         |                                                                                            |
| Alex                              | Barber        |                       |                  |             |                                          |                                                         |                                                                                            |
| Russell                           | Barber        |                       |                  |             |                                          |                                                         |                                                                                            |
| Miriam                            | Barbosa       |                       |                  |             |                                          |                                                         |                                                                                            |
| Mercedes                          | Barillas      |                       |                  |             |                                          |                                                         |                                                                                            |
| Ryan                              | Bariola       |                       |                  |             |                                          |                                                         |                                                                                            |
| Gareth                            | Barker        |                       |                  |             |                                          |                                                         |                                                                                            |
| Nicky                             | Barnes        |                       |                  |             |                                          |                                                         |                                                                                            |
| Matthew                           | Barnett       |                       |                  |             |                                          |                                                         |                                                                                            |
| Nathaly                           | Barnett       |                       |                  |             |                                          |                                                         |                                                                                            |
| Rebecca                           | Baron         |                       |                  |             |                                          |                                                         |                                                                                            |
| Robert                            | Bart          |                       |                  |             |                                          |                                                         |                                                                                            |
| Jazz                              | Bartholomew   |                       |                  |             |                                          |                                                         |                                                                                            |
| Shauna                            | Bartley       |                       |                  |             |                                          |                                                         |                                                                                            |
| David                             | Barton        |                       |                  |             |                                          |                                                         |                                                                                            |
| Jan                               | Barwell       |                       |                  |             |                                          |                                                         |                                                                                            |
| Archana                           | Bashyal       |                       |                  |             |                                          |                                                         |                                                                                            |
| Kim                               | Basile        |                       |                  |             |                                          |                                                         |                                                                                            |
| Frances                           | Bass          |                       |                  |             |                                          |                                                         |                                                                                            |
| Christopher                       | Bassford      |                       |                  |             |                                          |                                                         |                                                                                            |
| Pavinder                          | Bassi         |                       |                  |             |                                          |                                                         |                                                                                            |
| Betsy                             | Bassis        |                       |                  |             |                                          |                                                         |                                                                                            |
| Ian                               | Bateman       |                       |                  |             |                                          |                                                         |                                                                                            |
| Michelle                          | Bates         |                       |                  |             |                                          |                                                         |                                                                                            |
| Samantha                          | Bates         |                       |                  |             |                                          |                                                         |                                                                                            |
| Donna                             | Batty         |                       |                  |             |                                          |                                                         |                                                                                            |
| Kris                              | Bauchmuller   |                       |                  |             |                                          |                                                         |                                                                                            |

Supplemental Online Content: Nonauthor Collaborators

\*Indicates required information. Only first name, last name, and suffix will appear in PubMed.

| *First Name and Middle Initial(s) | *Last Name         | *Suffix (eg, Jr, III) | Academic Degrees | Institution | Location (city, state/province, country) | Role or Contribution, eg, chair, principal investigator | Group (if more than 1 Group listed in the byline and/or Subgroup (eg, Steering Committee)) |
|-----------------------------------|--------------------|-----------------------|------------------|-------------|------------------------------------------|---------------------------------------------------------|--------------------------------------------------------------------------------------------|
| Peter                             | Baughan            |                       |                  |             |                                          |                                                         |                                                                                            |
| Lydia                             | Baxter             |                       |                  |             |                                          |                                                         |                                                                                            |
| Charlotte                         | Baylem             |                       |                  |             |                                          |                                                         |                                                                                            |
| Lee                               | Bayliss            |                       |                  |             |                                          |                                                         |                                                                                            |
| Madeleine                         | Bayne              |                       |                  |             |                                          |                                                         |                                                                                            |
| Eileen                            | Bays               |                       |                  |             |                                          |                                                         |                                                                                            |
| Renée                             | Bazin              |                       |                  |             |                                          |                                                         |                                                                                            |
| Gregory                           | Beard              |                       |                  |             |                                          |                                                         |                                                                                            |
| Kirk                              | Beard              |                       |                  |             |                                          |                                                         |                                                                                            |
| Richard                           | Beasley            |                       |                  |             |                                          |                                                         |                                                                                            |
| Lynette                           | Beaudin            |                       |                  |             |                                          |                                                         |                                                                                            |
| Julie                             | Beaudoin           |                       |                  |             |                                          |                                                         |                                                                                            |
| Guillaume                         | Beaudoin-Bussières |                       |                  |             |                                          |                                                         |                                                                                            |
| Seonaid                           | Beddows            |                       |                  |             |                                          |                                                         |                                                                                            |
| Caroline                          | Bedford            |                       |                  |             |                                          |                                                         |                                                                                            |
| Deborah                           | Beer               |                       |                  |             |                                          |                                                         |                                                                                            |
| Salma                             | Begum              |                       |                  |             |                                          |                                                         |                                                                                            |
| Jasmine                           | Beharry            |                       |                  |             |                                          |                                                         |                                                                                            |
| Xiao                              | Bei Zhao           |                       |                  |             |                                          |                                                         |                                                                                            |
| Nathalie                          | Belec              |                       |                  |             |                                          |                                                         |                                                                                            |
| Gillian                           | Bell               |                       |                  |             |                                          |                                                         |                                                                                            |
| Glenda                            | Bell               |                       |                  |             |                                          |                                                         |                                                                                            |
| Joshua                            | Bell               |                       |                  |             |                                          |                                                         |                                                                                            |
| David                             | Bellemare          |                       |                  |             |                                          |                                                         |                                                                                            |
| Fatna                             | Benettaib          |                       |                  |             |                                          |                                                         |                                                                                            |
| Ann                               | Beninato           |                       |                  |             |                                          |                                                         |                                                                                            |
| Mehdi                             | Benlarbi           |                       |                  |             |                                          |                                                         |                                                                                            |
| Alexander                         | Bennett            |                       |                  |             |                                          |                                                         |                                                                                            |
| Christopher                       | Bennett            |                       |                  |             |                                          |                                                         |                                                                                            |
| Carrie                            | Bennett-Mills      |                       |                  |             |                                          |                                                         |                                                                                            |
| Andrea                            | Benoit             |                       |                  |             |                                          |                                                         |                                                                                            |

Supplemental Online Content: Nonauthor Collaborators

\*Indicates required information. Only first name, last name, and suffix will appear in PubMed.

| *First Name and Middle Initial(s) | *Last Name | *Suffix (eg, Jr, III) | Academic Degrees | Institution | Location (city, state/province, country) | Role or Contribution, eg, chair, principal investigator | Group (if more than 1 Group listed in the byline) and/or Subgroup (eg, Steering Committee) |
|-----------------------------------|------------|-----------------------|------------------|-------------|------------------------------------------|---------------------------------------------------------|--------------------------------------------------------------------------------------------|
| Jane                              | Benstead   |                       |                  |             |                                          |                                                         |                                                                                            |
| Dionne                            | Bentley    |                       |                  |             |                                          |                                                         |                                                                                            |
| Lauren                            | Berg       |                       |                  |             |                                          |                                                         |                                                                                            |
| Colin                             | Bergin     |                       |                  |             |                                          |                                                         |                                                                                            |
| Claudia                           | Berscheid  |                       |                  |             |                                          |                                                         |                                                                                            |
| Janis                             | Best-Lane  |                       |                  |             |                                          |                                                         |                                                                                            |
| Emily                             | Bevan      |                       |                  |             |                                          |                                                         |                                                                                            |
| Jeremy                            | Bewley     |                       |                  |             |                                          |                                                         |                                                                                            |
| Ashley                            | Beyerl     |                       |                  |             |                                          |                                                         |                                                                                            |
| Sanjay                            | Bhagani    |                       |                  |             |                                          |                                                         |                                                                                            |
| Khushpreet                        | Bhandal    |                       |                  |             |                                          |                                                         |                                                                                            |
| Simon                             | Biddie     |                       |                  |             |                                          |                                                         |                                                                                            |
| Jennifer                          | Biemans,   |                       |                  |             |                                          |                                                         |                                                                                            |
| Kelly                             | Bignell    |                       |                  |             |                                          |                                                         |                                                                                            |
| Shilesh                           | Bihari     |                       |                  |             |                                          |                                                         |                                                                                            |
| Maude                             | Bilodeau   |                       |                  |             |                                          |                                                         |                                                                                            |
| Carron                            | Bilton     |                       |                  |             |                                          |                                                         |                                                                                            |
| Martin J                          | Binney     |                       |                  |             |                                          |                                                         |                                                                                            |
| Alexandra                         | Binnie     |                       |                  |             |                                          |                                                         |                                                                                            |
| Julian                            | Bion       |                       |                  |             |                                          |                                                         |                                                                                            |
| Catherine                         | Birch      |                       |                  |             |                                          |                                                         |                                                                                            |
| Janine                            | Birch      |                       |                  |             |                                          |                                                         |                                                                                            |
| Kathrine                          | Birchall   |                       |                  |             |                                          |                                                         |                                                                                            |
| Isobel                            | Birkinshaw |                       |                  |             |                                          |                                                         |                                                                                            |
| Raquel                            | Bisa       |                       |                  |             |                                          |                                                         |                                                                                            |
| Ethel                             | Black      |                       |                  |             |                                          |                                                         |                                                                                            |
| Bethany                           | Blackledge |                       |                  |             |                                          |                                                         |                                                                                            |
| Stuart                            | Blackmore  |                       |                  |             |                                          |                                                         |                                                                                            |
| Annette                           | Blackwell  |                       |                  |             |                                          |                                                         |                                                                                            |
| Loraine                           | Blackwood  |                       |                  |             |                                          |                                                         |                                                                                            |
| Yvonne                            | Bland      |                       |                  |             |                                          |                                                         |                                                                                            |

Supplemental Online Content: Nonauthor Collaborators

\*Indicates required information. Only first name, last name, and suffix will appear in PubMed.

| *First Name and Middle Initial(s) | *Last Name | *Suffix (eg, Jr, III) | Academic Degrees | Institution | Location (city, state/province, country) | Role or Contribution, eg, chair, principal investigator | Group (if more than 1 Group listed in the byline) and/or Subgroup (eg, Steering Committee) |
|-----------------------------------|------------|-----------------------|------------------|-------------|------------------------------------------|---------------------------------------------------------|--------------------------------------------------------------------------------------------|
| Mary                              | Blanton    |                       |                  |             |                                          |                                                         |                                                                                            |
| Jenny                             | Blaxland   |                       |                  |             |                                          |                                                         |                                                                                            |
| Donna                             | Blofield   |                       |                  |             |                                          |                                                         |                                                                                            |
| Margie                            | Blom       |                       |                  |             |                                          |                                                         |                                                                                            |
| Jasmin                            | Board      |                       |                  |             |                                          |                                                         |                                                                                            |
| Aneta                             | Bociek     |                       |                  |             |                                          |                                                         |                                                                                            |
| Sherin                            | Bodh       |                       |                  |             |                                          |                                                         |                                                                                            |
| Virginie                          | Boisclair  |                       |                  |             |                                          |                                                         |                                                                                            |
| Sam                               | Bolton     |                       |                  |             |                                          |                                                         |                                                                                            |
| Wayne                             | Bolton     |                       |                  |             |                                          |                                                         |                                                                                            |
| Hayley                            | Bond       |                       |                  |             |                                          |                                                         |                                                                                            |
| Stephen                           | Bonner     |                       |                  |             |                                          |                                                         |                                                                                            |
| Wendy                             | Bonnert    |                       |                  |             |                                          |                                                         |                                                                                            |
| Leigh                             | Boorman    |                       |                  |             |                                          |                                                         |                                                                                            |
| Catherine                         | Booth      |                       |                  |             |                                          |                                                         |                                                                                            |
| Barbara                           | Borgatta   |                       |                  |             |                                          |                                                         |                                                                                            |
| Cameron                           | Borhani    |                       |                  |             |                                          |                                                         |                                                                                            |
| Naomi                             | Borkent    |                       |                  |             |                                          |                                                         |                                                                                            |
| Rachel                            | Borrell    |                       |                  |             |                                          |                                                         |                                                                                            |
| Zoe                               | Borrill    |                       |                  |             |                                          |                                                         |                                                                                            |
| Mamu                              | Boshir     |                       |                  |             |                                          |                                                         |                                                                                            |
| Brandon                           | Bouchard   |                       |                  |             |                                          |                                                         |                                                                                            |
| Marie-Claude                      | Boulanger  |                       |                  |             |                                          |                                                         |                                                                                            |
| Dounia                            | Boumahni   |                       |                  |             |                                          |                                                         |                                                                                            |
| Catherine                         | Bourassa   |                       |                  |             |                                          |                                                         |                                                                                            |
| Michelle                          | Bourne     |                       |                  |             |                                          |                                                         |                                                                                            |
| Richard                           | Bourne     |                       |                  |             |                                          |                                                         |                                                                                            |
| Daniel                            | Boutin     |                       |                  |             |                                          |                                                         |                                                                                            |
| Marianne                          | Boutin     |                       |                  |             |                                          |                                                         |                                                                                            |
| Darren                            | Bowen      |                       |                  |             |                                          |                                                         |                                                                                            |
| James                             | Bowen      |                       |                  |             |                                          |                                                         |                                                                                            |



Supplemental Online Content: Nonauthor Collaborators

\*Indicates required information. Only first name, last name, and suffix will appear in PubMed.

| *First Name and Middle Initial(s) | *Last Name | *Suffix (eg, Jr, III) | Academic Degrees | Institution | Location (city, state/province, country) | Role or Contribution, eg, chair, principal investigator | Group (if more than 1 Group listed in the byline) and/or Subgroup (eg, Steering Committee) |
|-----------------------------------|------------|-----------------------|------------------|-------------|------------------------------------------|---------------------------------------------------------|--------------------------------------------------------------------------------------------|
| Helen                             | Bowler     |                       |                  |             |                                          |                                                         |                                                                                            |
| Geoff                             | Bowyer     |                       |                  |             |                                          |                                                         |                                                                                            |
| Carmel                            | Boyd       |                       |                  |             |                                          |                                                         |                                                                                            |
| Craig                             | Boyd       |                       |                  |             |                                          |                                                         |                                                                                            |
| Maxine                            | Boyd       |                       |                  |             |                                          |                                                         |                                                                                            |
| Lucie                             | Boyer      |                       |                  |             |                                          |                                                         |                                                                                            |
| Rebecca                           | Boyles     |                       |                  |             |                                          |                                                         |                                                                                            |
| Gordana                           | Bozovic    |                       |                  |             |                                          |                                                         |                                                                                            |
| David                             | Brack      |                       |                  |             |                                          |                                                         |                                                                                            |
| Charlotte                         | Brackstone |                       |                  |             |                                          |                                                         |                                                                                            |
| Rob                               | Bradburn   |                       |                  |             |                                          |                                                         |                                                                                            |
| Barry                             | Bradley    |                       |                  |             |                                          |                                                         |                                                                                            |
| Paul                              | Bradley    |                       |                  |             |                                          |                                                         |                                                                                            |
| Sarah                             | Bradshaw   |                       |                  |             |                                          |                                                         |                                                                                            |
| Jane                              | Brailsford |                       |                  |             |                                          |                                                         |                                                                                            |
| Su                                | Brailsford |                       |                  |             |                                          |                                                         |                                                                                            |
| Emily                             | Brant      |                       |                  |             |                                          |                                                         |                                                                                            |
| Angela                            | Brazier    |                       |                  |             |                                          |                                                         |                                                                                            |
| Pamela                            | Bremmer    |                       |                  |             |                                          |                                                         |                                                                                            |
| Morwenna                          | Brend      |                       |                  |             |                                          |                                                         |                                                                                            |
| Val                               | Brennan    |                       |                  |             |                                          |                                                         |                                                                                            |
| Stephen                           | Brett      |                       |                  |             |                                          |                                                         |                                                                                            |
| Chris                             | Brewer     |                       |                  |             |                                          |                                                         |                                                                                            |
| Kathy                             | Brickell   |                       |                  |             |                                          |                                                         |                                                                                            |
| Mark                              | Briggs     |                       |                  |             |                                          |                                                         |                                                                                            |
| Chris                             | Brightling |                       |                  |             |                                          |                                                         |                                                                                            |
| Nicole                            | Brillinger |                       |                  |             |                                          |                                                         |                                                                                            |
| Lutece                            | Brimfield  |                       |                  |             |                                          |                                                         |                                                                                            |
| Stéphanie                         | Brisson    |                       |                  |             |                                          |                                                         |                                                                                            |
| Terri                             | Brittin    |                       |                  |             |                                          |                                                         |                                                                                            |
| Laurent                           | Brochard   |                       |                  |             |                                          |                                                         |                                                                                            |

Supplemental Online Content: Nonauthor Collaborators

\*Indicates required information. Only first name, last name, and suffix will appear in PubMed.

| *First Name and Middle Initial(s) | *Last Name   | *Suffix (eg, Jr, III) | Academic Degrees | Institution | Location (city, state/province, country) | Role or Contribution, eg, chair, principal investigator | Group (if more than 1 Group listed in the byline) and/or Subgroup (eg, Steering Committee) |
|-----------------------------------|--------------|-----------------------|------------------|-------------|------------------------------------------|---------------------------------------------------------|--------------------------------------------------------------------------------------------|
| Andrew                            | Broderick    |                       |                  |             |                                          |                                                         |                                                                                            |
| David                             | Broggio      |                       |                  |             |                                          |                                                         |                                                                                            |
| Farooq                            | Brohi        |                       |                  |             |                                          |                                                         |                                                                                            |
| Ceri                              | Brookes      |                       |                  |             |                                          |                                                         |                                                                                            |
| Nicole                            | Brooks       |                       |                  |             |                                          |                                                         |                                                                                            |
| Randy                             | Broom        |                       |                  |             |                                          |                                                         |                                                                                            |
| Marie                             | Browett      |                       |                  |             |                                          |                                                         |                                                                                            |
| Chloe                             | Brown        |                       |                  |             |                                          |                                                         |                                                                                            |
| Elizabeth                         | Brown        |                       |                  |             |                                          |                                                         |                                                                                            |
| Louise                            | Brown        |                       |                  |             |                                          |                                                         |                                                                                            |
| Mark                              | Brown        |                       |                  |             |                                          |                                                         |                                                                                            |
| Rachel                            | Brown        |                       |                  |             |                                          |                                                         |                                                                                            |
| Wayne                             | Brown        |                       |                  |             |                                          |                                                         |                                                                                            |
| Marie-Eve                         | Brulotte     |                       |                  |             |                                          |                                                         |                                                                                            |
| Emilie                            | Brunet       |                       |                  |             |                                          |                                                         |                                                                                            |
| Nigel                             | Brunskill    |                       |                  |             |                                          |                                                         |                                                                                            |
| Kayla                             | Bryan-Morris |                       |                  |             |                                          |                                                         |                                                                                            |
| Julie                             | Buchan       |                       |                  |             |                                          |                                                         |                                                                                            |
| Alexis                            | Buchanan     |                       |                  |             |                                          |                                                         |                                                                                            |
| Kathleen                          | Buckmire     |                       |                  |             |                                          |                                                         |                                                                                            |
| Joanna                            | Budd         |                       |                  |             |                                          |                                                         |                                                                                            |
| Pierrette                         | Bugden       |                       |                  |             |                                          |                                                         |                                                                                            |
| Heidi                             | Buhr         |                       |                  |             |                                          |                                                         |                                                                                            |
| Lori                              | Bullock      |                       |                  |             |                                          |                                                         |                                                                                            |
| Vitor                             | Buonavoglia  |                       |                  |             |                                          |                                                         |                                                                                            |
| Annmarie                          | Buoy         |                       |                  |             |                                          |                                                         |                                                                                            |
| Dorota                            | Burda        |                       |                  |             |                                          |                                                         |                                                                                            |
| Paula                             | Burgess      |                       |                  |             |                                          |                                                         |                                                                                            |
| Jason                             | Burkey       |                       |                  |             |                                          |                                                         |                                                                                            |
| Rachel                            | Burnish      |                       |                  |             |                                          |                                                         |                                                                                            |
| Dean                              | Burns        |                       |                  |             |                                          |                                                         |                                                                                            |

Supplemental Online Content: Nonauthor Collaborators

\*Indicates required information. Only first name, last name, and suffix will appear in PubMed.

| *First Name and Middle Initial(s) | *Last Name | *Suffix (eg, Jr, III) | Academic Degrees | Institution | Location (city, state/province, country) | Role or Contribution, eg, chair, principal investigator | Group (if more than 1 Group listed in the byline) and/or Subgroup (eg, Steering Committee) |
|-----------------------------------|------------|-----------------------|------------------|-------------|------------------------------------------|---------------------------------------------------------|--------------------------------------------------------------------------------------------|
| Karen                             | Burns      |                       |                  |             |                                          |                                                         |                                                                                            |
| Samuel                            | Burns      |                       |                  |             |                                          |                                                         |                                                                                            |
| Angela                            | Busby      |                       |                  |             |                                          |                                                         |                                                                                            |
| Hergen                            | Buscher    |                       |                  |             |                                          |                                                         |                                                                                            |
| Lesley                            | Butler     |                       |                  |             |                                          |                                                         |                                                                                            |
| Sophia                            | Butt       |                       |                  |             |                                          |                                                         |                                                                                            |
| Rahim                             | Byrne      |                       |                  |             |                                          |                                                         |                                                                                            |
| Eleanor                           | Byworth    |                       |                  |             |                                          |                                                         |                                                                                            |
| Louise                            | Cabrelli   |                       |                  |             |                                          |                                                         |                                                                                            |
| Leilani                           | Cabreros   |                       |                  |             |                                          |                                                         |                                                                                            |
| Tom                               | Cairns     |                       |                  |             |                                          |                                                         |                                                                                            |
| Moira                             | Caldwell   |                       |                  |             |                                          |                                                         |                                                                                            |
| Caroline                          | Calfee     |                       |                  |             |                                          |                                                         |                                                                                            |
| Lenka                             | Cambalova  |                       |                  |             |                                          |                                                         |                                                                                            |
| Sarah                             | Cameron    |                       |                  |             |                                          |                                                         |                                                                                            |
| Andrew                            | Campbell   |                       |                  |             |                                          |                                                         |                                                                                            |
| Debbie                            | Campbell   |                       |                  |             |                                          |                                                         |                                                                                            |
| Hilary                            | Campbell   |                       |                  |             |                                          |                                                         |                                                                                            |
| Karla                             | Campbell   |                       |                  |             |                                          |                                                         |                                                                                            |
| Lewis                             | Campbell   |                       |                  |             |                                          |                                                         |                                                                                            |
| Ryan                              | Campbell   |                       |                  |             |                                          |                                                         |                                                                                            |
| Josie                             | Campisi    |                       |                  |             |                                          |                                                         |                                                                                            |
| Sara                              | Campos     |                       |                  |             |                                          |                                                         |                                                                                            |
| Julie                             | Camsooksai |                       |                  |             |                                          |                                                         |                                                                                            |
| Ana                               | Canabarro  |                       |                  |             |                                          |                                                         |                                                                                            |
| Elaine                            | Carbonneau |                       |                  |             |                                          |                                                         |                                                                                            |
| Nuria                             | Cardenas   |                       |                  |             |                                          |                                                         |                                                                                            |
| Andrew                            | Carlton    |                       |                  |             |                                          |                                                         |                                                                                            |
| Rebecca                           | Carnegie   |                       |                  |             |                                          |                                                         |                                                                                            |
| Emily                             | Carpenter  |                       |                  |             |                                          |                                                         |                                                                                            |
| Lillian                           | Carpio     |                       |                  |             |                                          |                                                         |                                                                                            |

Supplemental Online Content: Nonauthor Collaborators

\*Indicates required information. Only first name, last name, and suffix will appear in PubMed.

| *First Name and Middle Initial(s) | *Last Name        | *Suffix (eg, Jr, III) | Academic Degrees | Institution | Location (city, state/province, country) | Role or Contribution, eg, chair, principal investigator | Group (if more than 1 Group listed in the byline) and/or Subgroup (eg, Steering Committee) |
|-----------------------------------|-------------------|-----------------------|------------------|-------------|------------------------------------------|---------------------------------------------------------|--------------------------------------------------------------------------------------------|
| Sarah                             | Carr              |                       |                  |             |                                          |                                                         |                                                                                            |
| François Martin                   | Carrier           |                       |                  |             |                                          |                                                         |                                                                                            |
| Marc                              | Carrier           |                       |                  |             |                                          |                                                         |                                                                                            |
| Samantha                          | Carrington        |                       |                  |             |                                          |                                                         |                                                                                            |
| Joanne                            | Carr-Wilkinson    |                       |                  |             |                                          |                                                         |                                                                                            |
| David                             | Carter            |                       |                  |             |                                          |                                                         |                                                                                            |
| Moira                             | Carter            |                       |                  |             |                                          |                                                         |                                                                                            |
| Steven                            | Carter            |                       |                  |             |                                          |                                                         |                                                                                            |
| Simon                             | Carter-Graham     |                       |                  |             |                                          |                                                         |                                                                                            |
|                                   | Carveth-          |                       |                  |             |                                          |                                                         |                                                                                            |
| Carolyn                           | Marshall          |                       |                  |             |                                          |                                                         |                                                                                            |
| Sherry                            | Casali            |                       |                  |             |                                          |                                                         |                                                                                            |
| Ruth                              | Casey             |                       |                  |             |                                          |                                                         |                                                                                            |
| Susanne                           | Cathcart          |                       |                  |             |                                          |                                                         |                                                                                            |
| Jill                              | Caulfield         |                       |                  |             |                                          |                                                         |                                                                                            |
| Alexandros                        | Cavayas           |                       |                  |             |                                          |                                                         |                                                                                            |
| Kathryn                           | Cawley            |                       |                  |             |                                          |                                                         |                                                                                            |
| Maurizio                          | Cecconi           |                       |                  |             |                                          |                                                         |                                                                                            |
| John                              | Centofanti        |                       |                  |             |                                          |                                                         |                                                                                            |
| Loku                              | Chamara Warnapura |                       |                  |             |                                          |                                                         |                                                                                            |
| Éric                              | Chamberland       |                       |                  |             |                                          |                                                         |                                                                                            |
| Emma                              | Chambers          |                       |                  |             |                                          |                                                         |                                                                                            |
| Shreekant                         | Champanerkar      |                       |                  |             |                                          |                                                         |                                                                                            |
| Charles                           | Chan              |                       |                  |             |                                          |                                                         |                                                                                            |
| Michael                           | Chan              |                       |                  |             |                                          |                                                         |                                                                                            |
| Petrus                            | Chan              |                       |                  |             |                                          |                                                         |                                                                                            |
| Sunita                            | Chand             |                       |                  |             |                                          |                                                         |                                                                                            |
|                                   |                   |                       |                  |             |                                          |                                                         |                                                                                            |
| Vikki                             | Chandler-Vizard   |                       |                  |             |                                          |                                                         |                                                                                            |
| Cherry                            | Chang             |                       |                  |             |                                          |                                                         |                                                                                            |
| Terry                             | Channon           |                       |                  |             |                                          |                                                         |                                                                                            |

Supplemental Online Content: Nonauthor Collaborators

\*Indicates required information. Only first name, last name, and suffix will appear in PubMed.

| *First Name and Middle Initial(s) | *Last Name   | *Suffix (eg, Jr, III) | Academic Degrees | Institution | Location (city, state/province, country) | Role or Contribution, eg, chair, principal investigator | Group (if more than 1 Group listed in the byline) and/or Subgroup (eg, Steering Committee) |
|-----------------------------------|--------------|-----------------------|------------------|-------------|------------------------------------------|---------------------------------------------------------|--------------------------------------------------------------------------------------------|
| Marianne                          | Chapman      |                       |                  |             |                                          |                                                         |                                                                                            |
| Susan                             | Chapman      |                       |                  |             |                                          |                                                         |                                                                                            |
| Linda                             | Chapple      |                       |                  |             |                                          |                                                         |                                                                                            |
| Bethan                            | Charles      |                       |                  |             |                                          |                                                         |                                                                                            |
| Richard                           | Charlewood   |                       |                  |             |                                          |                                                         |                                                                                            |
| Andrew                            | Charlton     |                       |                  |             |                                          |                                                         |                                                                                            |
| Sally                             | Charlton     |                       |                  |             |                                          |                                                         |                                                                                            |
| Sam                               | Charlton     |                       |                  |             |                                          |                                                         |                                                                                            |
| Sarah                             | Charnock     |                       |                  |             |                                          |                                                         |                                                                                            |
| Vipul                             | Chauhan      |                       |                  |             |                                          |                                                         |                                                                                            |
| Rosanna                           | Chavez       |                       |                  |             |                                          |                                                         |                                                                                            |
| Maria                             | Cheadle      |                       |                  |             |                                          |                                                         |                                                                                            |
| Shiney                            | Cherian      |                       |                  |             |                                          |                                                         |                                                                                            |
| Suzanne                           | Cherif       |                       |                  |             |                                          |                                                         |                                                                                            |
| Betty                             | Cheung       |                       |                  |             |                                          |                                                         |                                                                                            |
| Emily                             | Cheung       |                       |                  |             |                                          |                                                         |                                                                                            |
| Manish                            | Chhablani    |                       |                  |             |                                          |                                                         |                                                                                            |
| Karen                             | Chinn        |                       |                  |             |                                          |                                                         |                                                                                            |
| Vashira                           | Chiroma      |                       |                  |             |                                          |                                                         |                                                                                            |
| Christian                         | Choquet      |                       |                  |             |                                          |                                                         |                                                                                            |
| Judy YC                           | Chou         |                       |                  |             |                                          |                                                         |                                                                                            |
| Fateha                            | Chowdhury    |                       |                  |             |                                          |                                                         |                                                                                            |
| Sri                               | Chukkambotla |                       |                  |             |                                          |                                                         |                                                                                            |
| Jae                               | Chung        |                       |                  |             |                                          |                                                         |                                                                                            |
| Nick                              | Cicccone     |                       |                  |             |                                          |                                                         |                                                                                            |
| Rob                               | Cimaglia     |                       |                  |             |                                          |                                                         |                                                                                            |
| Emanuel                           | Cirstea      |                       |                  |             |                                          |                                                         |                                                                                            |
| Michele                           | Clark        |                       |                  |             |                                          |                                                         |                                                                                            |
| Richard                           | Clark        |                       |                  |             |                                          |                                                         |                                                                                            |
| Sarah                             | Clark        |                       |                  |             |                                          |                                                         |                                                                                            |
| Wendy                             | Clark        |                       |                  |             |                                          |                                                         |                                                                                            |

Supplemental Online Content: Nonauthor Collaborators

\*Indicates required information. Only first name, last name, and suffix will appear in PubMed.

| *First Name and Middle Initial(s) | *Last Name  | *Suffix (eg, Jr, III) | Academic Degrees | Institution | Location (city, state/province, country) | Role or Contribution, eg, chair, principal investigator | Group (if more than 1 Group listed in the byline) and/or Subgroup (eg, Steering Committee) |
|-----------------------------------|-------------|-----------------------|------------------|-------------|------------------------------------------|---------------------------------------------------------|--------------------------------------------------------------------------------------------|
| Frances                           | Clarke      |                       |                  |             |                                          |                                                         |                                                                                            |
| Gwen                              | Clarke      |                       |                  |             |                                          |                                                         |                                                                                            |
| Heather                           | Clarke      |                       |                  |             |                                          |                                                         |                                                                                            |
| Mark                              | Clarke      |                       |                  |             |                                          |                                                         |                                                                                            |
| Sarah                             | Clarke      |                       |                  |             |                                          |                                                         |                                                                                            |
| Andrew                            | Clarkson    |                       |                  |             |                                          |                                                         |                                                                                            |
| Andrew                            | Claxton     |                       |                  |             |                                          |                                                         |                                                                                            |
| Ian                               | Clement     |                       |                  |             |                                          |                                                         |                                                                                            |
| Francesca                         | Clemons     |                       |                  |             |                                          |                                                         |                                                                                            |
| Gilles                            | Clermont    |                       |                  |             |                                          |                                                         |                                                                                            |
| Julie                             | Cleverdon   |                       |                  |             |                                          |                                                         |                                                                                            |
| Lee                               | Clifford    |                       |                  |             |                                          |                                                         |                                                                                            |
| Lynne                             | Clifford    |                       |                  |             |                                          |                                                         |                                                                                            |
| Alison                            | Clinton     |                       |                  |             |                                          |                                                         |                                                                                            |
| Ève                               | Cloutier    |                       |                  |             |                                          |                                                         |                                                                                            |
| Marc                              | Cloutier    |                       |                  |             |                                          |                                                         |                                                                                            |
| Tony                              | Coates      |                       |                  |             |                                          |                                                         |                                                                                            |
| Maeve                             | Cockrell    |                       |                  |             |                                          |                                                         |                                                                                            |
| Phoebe                            | Coghlan     |                       |                  |             |                                          |                                                         |                                                                                            |
| Connie                            | Colavecchia |                       |                  |             |                                          |                                                         |                                                                                            |
| Carol                             | Cole        |                       |                  |             |                                          |                                                         |                                                                                            |
| Jade                              | Cole        |                       |                  |             |                                          |                                                         |                                                                                            |
| Julie                             | Cole        |                       |                  |             |                                          |                                                         |                                                                                            |
| Sue                               | Cole        |                       |                  |             |                                          |                                                         |                                                                                            |
| Jennifer                          | Coles       |                       |                  |             |                                          |                                                         |                                                                                            |
| Rebecca                           | Coles       |                       |                  |             |                                          |                                                         |                                                                                            |
| Dawn                              | Collier     |                       |                  |             |                                          |                                                         |                                                                                            |
| Emma                              | Collins     |                       |                  |             |                                          |                                                         |                                                                                            |
| Érin                              | Collins     |                       |                  |             |                                          |                                                         |                                                                                            |
| Joanne                            | Collins     |                       |                  |             |                                          |                                                         |                                                                                            |
| Matthew                           | Collis      |                       |                  |             |                                          |                                                         |                                                                                            |

Supplemental Online Content: Nonauthor Collaborators

\*Indicates required information. Only first name, last name, and suffix will appear in PubMed.

| *First Name and Middle Initial(s) | *Last Name  | *Suffix (eg, Jr, III) | Academic Degrees | Institution | Location (city, state/province, country) | Role or Contribution, eg, chair, principal investigator | Group (if more than 1 Group listed in the byline) and/or Subgroup (eg, Steering Committee) |
|-----------------------------------|-------------|-----------------------|------------------|-------------|------------------------------------------|---------------------------------------------------------|--------------------------------------------------------------------------------------------|
| Mike                              | Comery      |                       |                  |             |                                          |                                                         |                                                                                            |
| Karen                             | Connolly    |                       |                  |             |                                          |                                                         |                                                                                            |
| Jason                             | Connor      |                       |                  |             |                                          |                                                         |                                                                                            |
| Samantha                          | Conran      |                       |                  |             |                                          |                                                         |                                                                                            |
| Pamela                            | Conrod      |                       |                  |             |                                          |                                                         |                                                                                            |
| Camilla                           | Conway      |                       |                  |             |                                          |                                                         |                                                                                            |
| Deborah                           | Cook        |                       |                  |             |                                          |                                                         |                                                                                            |
| Tim                               | Cook        |                       |                  |             |                                          |                                                         |                                                                                            |
| Jill                              | Cooke       |                       |                  |             |                                          |                                                         |                                                                                            |
| Soo                               | Cooke       |                       |                  |             |                                          |                                                         |                                                                                            |
| Alison                            | Cooper      |                       |                  |             |                                          |                                                         |                                                                                            |
| D. James                          | Cooper      |                       |                  |             |                                          |                                                         |                                                                                            |
| Joanne                            | Cooper      |                       |                  |             |                                          |                                                         |                                                                                            |
| Josh                              | Cooper      |                       |                  |             |                                          |                                                         |                                                                                            |
| Laura                             | Cooper      |                       |                  |             |                                          |                                                         |                                                                                            |
| Lauren                            | Cooper      |                       |                  |             |                                          |                                                         |                                                                                            |
| Emma                              | Cooperwaite |                       |                  |             |                                          |                                                         |                                                                                            |
| Ele                               | Corcoran    |                       |                  |             |                                          |                                                         |                                                                                            |
| Shannon                           | Cormick     |                       |                  |             |                                          |                                                         |                                                                                            |
| Sarah                             | Cornell     |                       |                  |             |                                          |                                                         |                                                                                            |
| Mary                              | Corriveau   |                       |                  |             |                                          |                                                         |                                                                                            |
| Catherine                         | Corry       |                       |                  |             |                                          |                                                         |                                                                                            |
| Oliver                            | Costerousse |                       |                  |             |                                          |                                                         |                                                                                            |
| Alice                             | Cotton      |                       |                  |             |                                          |                                                         |                                                                                            |
| Amanda                            | Coutts      |                       |                  |             |                                          |                                                         |                                                                                            |
| Ruth                              | Cowburn     |                       |                  |             |                                          |                                                         |                                                                                            |
| Nicholas                          | Cowley      |                       |                  |             |                                          |                                                         |                                                                                            |
| Debra Anne                        | Cox         |                       |                  |             |                                          |                                                         |                                                                                            |
| Mark                              | Coyne       |                       |                  |             |                                          |                                                         |                                                                                            |
| Beverley                          | Crane       |                       |                  |             |                                          |                                                         |                                                                                            |
| Leona                             | Crane       |                       |                  |             |                                          |                                                         |                                                                                            |

Supplemental Online Content: Nonauthor Collaborators

\*Indicates required information. Only first name, last name, and suffix will appear in PubMed.

| *First Name and Middle Initial(s) | *Last Name   | *Suffix (eg, Jr, III) | Academic Degrees | Institution | Location (city, state/province, country) | Role or Contribution, eg, chair, principal investigator | Group (if more than 1 Group listed in the byline) and/or Subgroup (eg, Steering Committee) |
|-----------------------------------|--------------|-----------------------|------------------|-------------|------------------------------------------|---------------------------------------------------------|--------------------------------------------------------------------------------------------|
| Michelle                          | Craner       |                       |                  |             |                                          |                                                         |                                                                                            |
| Thomas H                          | Craven       |                       |                  |             |                                          |                                                         |                                                                                            |
| Adrian                            | Crawford     |                       |                  |             |                                          |                                                         |                                                                                            |
| Sarah                             | Crawshaw     |                       |                  |             |                                          |                                                         |                                                                                            |
| Ben                               | Creagh-Brown |                       |                  |             |                                          |                                                         |                                                                                            |
| Ryan                              | Creighton    |                       |                  |             |                                          |                                                         |                                                                                            |
| Olaf                              | Cremer       |                       |                  |             |                                          |                                                         |                                                                                            |
| Nikki                             | Crisp        |                       |                  |             |                                          |                                                         |                                                                                            |
| Maria                             | Croft        |                       |                  |             |                                          |                                                         |                                                                                            |
| Ian                               | Cron         |                       |                  |             |                                          |                                                         |                                                                                            |
| Derrick                           | Crook        |                       |                  |             |                                          |                                                         |                                                                                            |
| Helen                             | Croot        |                       |                  |             |                                          |                                                         |                                                                                            |
| Mylene                            | Crosby       |                       |                  |             |                                          |                                                         |                                                                                            |
| Sarah                             | Cross        |                       |                  |             |                                          |                                                         |                                                                                            |
| Helen                             | Crumley      |                       |                  |             |                                          |                                                         |                                                                                            |
| Joanna                            | Cudlipp      |                       |                  |             |                                          |                                                         |                                                                                            |
| Oriela                            | Cuevas       |                       |                  |             |                                          |                                                         |                                                                                            |
| Donna                             | Cullen       |                       |                  |             |                                          |                                                         |                                                                                            |
| Marie                             | Cundall      |                       |                  |             |                                          |                                                         |                                                                                            |
| Debra                             | Curley       |                       |                  |             |                                          |                                                         |                                                                                            |
| Andrew                            | Currie,      |                       |                  |             |                                          |                                                         |                                                                                            |
| Abi                               | Curtis       |                       |                  |             |                                          |                                                         |                                                                                            |
| Becca                             | Curtis       |                       |                  |             |                                          |                                                         |                                                                                            |
| Rebecca                           | Cusack       |                       |                  |             |                                          |                                                         |                                                                                            |
| Brian                             | Cuthbertson  |                       |                  |             |                                          |                                                         |                                                                                            |
| Sean                              | Cutler       |                       |                  |             |                                          |                                                         |                                                                                            |
| Frédéric                          | D'Aragon     |                       |                  |             |                                          |                                                         |                                                                                            |
| Joana                             | Da Rocha     |                       |                  |             |                                          |                                                         |                                                                                            |
| Admad                             | Daebis       |                       |                  |             |                                          |                                                         |                                                                                            |
| Phil                              | Daggett      |                       |                  |             |                                          |                                                         |                                                                                            |
| Rana                              | Daher        |                       |                  |             |                                          |                                                         |                                                                                            |



Supplemental Online Content: Nonauthor Collaborators

\*Indicates required information. Only first name, last name, and suffix will appear in PubMed.

| *First Name and Middle Initial(s) | *Last Name   | *Suffix (eg, Jr, III) | Academic Degrees | Institution | Location (city, state/province, country) | Role or Contribution, eg, chair, principal investigator | Group (if more than 1 Group listed in the byline) and/or Subgroup (eg, Steering Committee) |
|-----------------------------------|--------------|-----------------------|------------------|-------------|------------------------------------------|---------------------------------------------------------|--------------------------------------------------------------------------------------------|
| Line                              | Daigle       |                       |                  |             |                                          |                                                         |                                                                                            |
| Helen                             | Dakers-Black |                       |                  |             |                                          |                                                         |                                                                                            |
| Jessica                           | Daley        |                       |                  |             |                                          |                                                         |                                                                                            |
| Nikki                             | Dallas       |                       |                  |             |                                          |                                                         |                                                                                            |
| James                             | Dalton       |                       |                  |             |                                          |                                                         |                                                                                            |
| Zoe                               | Daly         |                       |                  |             |                                          |                                                         |                                                                                            |
| Raj                               | Damhar       |                       |                  |             |                                          |                                                         |                                                                                            |
| Nick                              | Daneman      |                       |                  |             |                                          |                                                         |                                                                                            |
| Carol                             | Daniels      |                       |                  |             |                                          |                                                         |                                                                                            |
| Paul                              | Dark         |                       |                  |             |                                          |                                                         |                                                                                            |
| Karen                             | Darling      |                       |                  |             |                                          |                                                         |                                                                                            |
| Tace                              | Darling      |                       |                  |             |                                          |                                                         |                                                                                            |
| Sri                               | Darshana     |                       |                  |             |                                          |                                                         |                                                                                            |
| Antu                              | Das          |                       |                  |             |                                          |                                                         |                                                                                            |
| Jason                             | Daugherty    |                       |                  |             |                                          |                                                         |                                                                                            |
| Michelle                          | Davey        |                       |                  |             |                                          |                                                         |                                                                                            |
| Miriam                            | Davey        |                       |                  |             |                                          |                                                         |                                                                                            |
| Arlene                            | David        |                       |                  |             |                                          |                                                         |                                                                                            |
| Neil                              | Davidson     |                       |                  |             |                                          |                                                         |                                                                                            |
| Alison                            | Davies       |                       |                  |             |                                          |                                                         |                                                                                            |
| Cheryl                            | Davies       |                       |                  |             |                                          |                                                         |                                                                                            |
| Ellie                             | Davies       |                       |                  |             |                                          |                                                         |                                                                                            |
| Gwyneth                           | Davies       |                       |                  |             |                                          |                                                         |                                                                                            |
| James                             | Davies       |                       |                  |             |                                          |                                                         |                                                                                            |
| Jane                              | Davies       |                       |                  |             |                                          |                                                         |                                                                                            |
| Louisa                            | Davies       |                       |                  |             |                                          |                                                         |                                                                                            |
| Mark                              | Davies       |                       |                  |             |                                          |                                                         |                                                                                            |
| Michelle                          | Davies       |                       |                  |             |                                          |                                                         |                                                                                            |
| Michelle                          | Davies       |                       |                  |             |                                          |                                                         |                                                                                            |
| Rhys                              | Davies       |                       |                  |             |                                          |                                                         |                                                                                            |
| Alison                            | Davis        |                       |                  |             |                                          |                                                         |                                                                                            |

Supplemental Online Content: Nonauthor Collaborators

\*Indicates required information. Only first name, last name, and suffix will appear in PubMed.

| *First Name and Middle Initial(s) | *Last Name         | *Suffix (eg, Jr, III) | Academic Degrees | Institution | Location (city, state/province, country) | Role or Contribution, eg, chair, principal investigator | Group (if more than 1 Group listed in the byline) and/or Subgroup (eg, Steering Committee) |
|-----------------------------------|--------------------|-----------------------|------------------|-------------|------------------------------------------|---------------------------------------------------------|--------------------------------------------------------------------------------------------|
| Sophia                            | Davison            |                       |                  |             |                                          |                                                         |                                                                                            |
| Janice                            | Dawe               |                       |                  |             |                                          |                                                         |                                                                                            |
| Lisa                              | Dawe               |                       |                  |             |                                          |                                                         |                                                                                            |
| Laura Ann                         | Dawson             |                       |                  |             |                                          |                                                         |                                                                                            |
| Rosanne                           | Dawson             |                       |                  |             |                                          |                                                         |                                                                                            |
| Kim                               | de Courcy-Golder   |                       |                  |             |                                          |                                                         |                                                                                            |
| Dianne                            | de Jong            |                       |                  |             |                                          |                                                         |                                                                                            |
| Arnold                            | De la Rosa         |                       |                  |             |                                          |                                                         |                                                                                            |
| Angelique                         | De Man             |                       |                  |             |                                          |                                                         |                                                                                            |
| Mark                              | De Neef            |                       |                  |             |                                          |                                                         |                                                                                            |
| Bethan                            | Deacon             |                       |                  |             |                                          |                                                         |                                                                                            |
| Tessa                             | Dean               |                       |                  |             |                                          |                                                         |                                                                                            |
| Dylene                            | Deans              |                       |                  |             |                                          |                                                         |                                                                                            |
| Joy                               | Dearden            |                       |                  |             |                                          |                                                         |                                                                                            |
| Alison                            | Deary              |                       |                  |             |                                          |                                                         |                                                                                            |
| Sylvie                            | Debigaré           |                       |                  |             |                                          |                                                         |                                                                                            |
| William                           | Dechert            |                       |                  |             |                                          |                                                         |                                                                                            |
| Raji                              | Dehulia            |                       |                  |             |                                          |                                                         |                                                                                            |
| Lorenzo                           | del Sorbo          |                       |                  |             |                                          |                                                         |                                                                                            |
| Lisa                              | Delaney            |                       |                  |             |                                          |                                                         |                                                                                            |
| Sue                               | Della Toffalo      |                       |                  |             |                                          |                                                         |                                                                                            |
| Carrie                            | Demetriou          |                       |                  |             |                                          |                                                         |                                                                                            |
| Craig                             | Denmade            |                       |                  |             |                                          |                                                         |                                                                                            |
| Randle                            | Derbyshire         |                       |                  |             |                                          |                                                         |                                                                                            |
| Purav                             | Desai              |                       |                  |             |                                          |                                                         |                                                                                            |
| Jade                              | Descôteaux-Dinelle |                       |                  |             |                                          |                                                         |                                                                                            |
| Kush                              | Deshpande          |                       |                  |             |                                          |                                                         |                                                                                            |
| Michelle                          | Detry              |                       |                  |             |                                          |                                                         |                                                                                            |
| Brendan                           | Devine             |                       |                  |             |                                          |                                                         |                                                                                            |
| Dana                              | Devine             |                       |                  |             |                                          |                                                         |                                                                                            |
| Trudy                             | Devine             |                       |                  |             |                                          |                                                         |                                                                                            |

Supplemental Online Content: Nonauthor Collaborators

\*Indicates required information. Only first name, last name, and suffix will appear in PubMed.

| *First Name and Middle Initial(s) | *Last Name  | *Suffix (eg, Jr, III) | Academic Degrees | Institution | Location (city, state/province, country) | Role or Contribution, eg, chair, principal investigator | Group (if more than 1 Group listed in the byline and/or Subgroup (eg, Steering Committee)) |
|-----------------------------------|-------------|-----------------------|------------------|-------------|------------------------------------------|---------------------------------------------------------|--------------------------------------------------------------------------------------------|
| Bodine                            | Dewitt      |                       |                  |             |                                          |                                                         |                                                                                            |
| Jas                               | Dhalliwal   |                       |                  |             |                                          |                                                         |                                                                                            |
| Aman                              | Dhesi       |                       |                  |             |                                          |                                                         |                                                                                            |
| Pamela                            | Diamond     |                       |                  |             |                                          |                                                         |                                                                                            |
| Julie                             | Dice        |                       |                  |             |                                          |                                                         |                                                                                            |
| Stephen                           | Digby       |                       |                  |             |                                          |                                                         |                                                                                            |
| Julie                             | Dijo        |                       |                  |             |                                          |                                                         |                                                                                            |
| Kristina                          | Dimitrova   |                       |                  |             |                                          |                                                         |                                                                                            |
| Maria                             | Dineen      |                       |                  |             |                                          |                                                         |                                                                                            |
| Tri                               | Dinh        |                       |                  |             |                                          |                                                         |                                                                                            |
| Stephen                           | Dixon-Mould |                       |                  |             |                                          |                                                         |                                                                                            |
| Patricia                          | Doble       |                       |                  |             |                                          |                                                         |                                                                                            |
| Jade                              | Dobson      |                       |                  |             |                                          |                                                         |                                                                                            |
| Ronan                             | Doherty     |                       |                  |             |                                          |                                                         |                                                                                            |
| Rozzie                            | Dolman      |                       |                  |             |                                          |                                                         |                                                                                            |
| Chenell                           | Donadee     |                       |                  |             |                                          |                                                         |                                                                                            |
| Kate                              | Donaldson   |                       |                  |             |                                          |                                                         |                                                                                            |
| Arjen M                           | Dondrop     |                       |                  |             |                                          |                                                         |                                                                                            |
| Clare                             | Donegan     |                       |                  |             |                                          |                                                         |                                                                                            |
| Heather                           | Donkin      |                       |                  |             |                                          |                                                         |                                                                                            |
| Sinead                            | Donlon      |                       |                  |             |                                          |                                                         |                                                                                            |
| Adrian                            | Donnelly    |                       |                  |             |                                          |                                                         |                                                                                            |
| Phil                              | Donnison    |                       |                  |             |                                          |                                                         |                                                                                            |
| Reece                             | Doonan      |                       |                  |             |                                          |                                                         |                                                                                            |
| Peter                             | Doran       |                       |                  |             |                                          |                                                         |                                                                                            |
| Amanda                            | Dornan      |                       |                  |             |                                          |                                                         |                                                                                            |
| Melissa                           | Dougherty   |                       |                  |             |                                          |                                                         |                                                                                            |
| Jan                               | Douziech    |                       |                  |             |                                          |                                                         |                                                                                            |
| Kerry                             | Dowling     |                       |                  |             |                                          |                                                         |                                                                                            |
| Philippa                          | Downey      |                       |                  |             |                                          |                                                         |                                                                                            |
| Cristina                          | Dragomir    |                       |                  |             |                                          |                                                         |                                                                                            |

Supplemental Online Content: Nonauthor Collaborators

\*Indicates required information. Only first name, last name, and suffix will appear in PubMed.

| *First Name and Middle Initial(s) | *Last Name   | *Suffix (eg, Jr, III) | Academic Degrees | Institution | Location (city, state/province, country) | Role or Contribution, eg, chair, principal investigator | Group (if more than 1 Group listed in the byline) and/or Subgroup (eg, Steering Committee) |
|-----------------------------------|--------------|-----------------------|------------------|-------------|------------------------------------------|---------------------------------------------------------|--------------------------------------------------------------------------------------------|
| Chelsea                           | Drake        |                       |                  |             |                                          |                                                         |                                                                                            |
| Michael                           | Drebot       |                       |                  |             |                                          |                                                         |                                                                                            |
| Steven                            | Drews        |                       |                  |             |                                          |                                                         |                                                                                            |
| Nikki                             | Drogman      |                       |                  |             |                                          |                                                         |                                                                                            |
| Mathieu                           | Drouin       |                       |                  |             |                                          |                                                         |                                                                                            |
| Julian                            | Druce        |                       |                  |             |                                          |                                                         |                                                                                            |
| Andrew                            | Drummond     |                       |                  |             |                                          |                                                         |                                                                                            |
| Kay                               | Drury        |                       |                  |             |                                          |                                                         |                                                                                            |
| Hannah                            | D'Silva      |                       |                  |             |                                          |                                                         |                                                                                            |
| Brenda                            | Du Plessis   |                       |                  |             |                                          |                                                         |                                                                                            |
| Erick                             | Duan         |                       |                  |             |                                          |                                                         |                                                                                            |
| Stephen                           | Duberley     |                       |                  |             |                                          |                                                         |                                                                                            |
| Éric                              | Ducas        |                       |                  |             |                                          |                                                         |                                                                                            |
| Sam                               | Duff-Miller  |                       |                  |             |                                          |                                                         |                                                                                            |
| Eamon                             | Duffy        |                       |                  |             |                                          |                                                         |                                                                                            |
| Helen                             | Duggan       |                       |                  |             |                                          |                                                         |                                                                                            |
| Zoe                               | Duke         |                       |                  |             |                                          |                                                         |                                                                                            |
| Mick                              | Duley        |                       |                  |             |                                          |                                                         |                                                                                            |
| Joanne                            | Duncan       |                       |                  |             |                                          |                                                         |                                                                                            |
| Tracy                             | Duncan       |                       |                  |             |                                          |                                                         |                                                                                            |
| Deanne                            | Dunphy       |                       |                  |             |                                          |                                                         |                                                                                            |
| Mathilde                          | Duplaix      |                       |                  |             |                                          |                                                         |                                                                                            |
| Steve                             | Durgacharan  |                       |                  |             |                                          |                                                         |                                                                                            |
| Ahilanandan                       | Dushianthan  |                       |                  |             |                                          |                                                         |                                                                                            |
| Nathalie                          | Dussault     |                       |                  |             |                                          |                                                         |                                                                                            |
| Sarah                             | Dyas         |                       |                  |             |                                          |                                                         |                                                                                            |
| Kim                               | East         |                       |                  |             |                                          |                                                         |                                                                                            |
| Christine                         | Eastgate     |                       |                  |             |                                          |                                                         |                                                                                            |
| Caroline                          | Eaton        |                       |                  |             |                                          |                                                         |                                                                                            |
| Caroline                          | Eaton-Howell |                       |                  |             |                                          |                                                         |                                                                                            |
| Simone                            | Ebbinghaus   |                       |                  |             |                                          |                                                         |                                                                                            |

Supplemental Online Content: Nonauthor Collaborators

\*Indicates required information. Only first name, last name, and suffix will appear in PubMed.

| *First Name and Middle Initial(s) | *Last Name | *Suffix (eg, Jr, III) | Academic Degrees | Institution | Location (city, state/province, country) | Role or Contribution, eg, chair, principal investigator | Group (if more than 1 Group listed in the byline) and/or Subgroup (eg, Steering Committee) |
|-----------------------------------|------------|-----------------------|------------------|-------------|------------------------------------------|---------------------------------------------------------|--------------------------------------------------------------------------------------------|
| Daniel                            | Ebner      |                       |                  |             |                                          |                                                         |                                                                                            |
| Dave                              | Edmondson  |                       |                  |             |                                          |                                                         |                                                                                            |
| Alexandra                         | Edwards    |                       |                  |             |                                          |                                                         |                                                                                            |
| Tomos                             | Edwards    |                       |                  |             |                                          |                                                         |                                                                                            |
| Evelien                           | Effelaar   |                       |                  |             |                                          |                                                         |                                                                                            |
| Evelien                           | Effelaar   |                       |                  |             |                                          |                                                         |                                                                                            |
| Munzir                            | Elhassan   |                       |                  |             |                                          |                                                         |                                                                                            |
| Chris                             | Elliott    |                       |                  |             |                                          |                                                         |                                                                                            |
| Toby                              | Elliott    |                       |                  |             |                                          |                                                         |                                                                                            |
| Ann-Marie                         | Ellis      |                       |                  |             |                                          |                                                         |                                                                                            |
| Chiara                            | Ellis      |                       |                  |             |                                          |                                                         |                                                                                            |
| Christine                         | Ellis      |                       |                  |             |                                          |                                                         |                                                                                            |
| Kay                               | Ellis      |                       |                  |             |                                          |                                                         |                                                                                            |
| Yvette                            | Ellis      |                       |                  |             |                                          |                                                         |                                                                                            |
| Cathy                             | Ellsworth  |                       |                  |             |                                          |                                                         |                                                                                            |
| Einas                             | Elmahi     |                       |                  |             |                                          |                                                         |                                                                                            |
| Mohammed                          | Elmi       |                       |                  |             |                                          |                                                         |                                                                                            |
| Tarek                             | Elsefi     |                       |                  |             |                                          |                                                         |                                                                                            |
| Ayaa                              | Eltayeb    |                       |                  |             |                                          |                                                         |                                                                                            |
| Shane                             | English    |                       |                  |             |                                          |                                                         |                                                                                            |
| Ian                               | Entino     |                       |                  |             |                                          |                                                         |                                                                                            |
| Slava                             | Epelman    |                       |                  |             |                                          |                                                         |                                                                                            |
| Stephan                           | Ermann     |                       |                  |             |                                          |                                                         |                                                                                            |
| Aljoska                           | Escorcia   |                       |                  |             |                                          |                                                         |                                                                                            |
| Helen                             | Escreet    |                       |                  |             |                                          |                                                         |                                                                                            |
| Andrew                            | Evans      |                       |                  |             |                                          |                                                         |                                                                                            |
| David                             | Evans      |                       |                  |             |                                          |                                                         |                                                                                            |
| Debra                             | Evans      |                       |                  |             |                                          |                                                         |                                                                                            |
| Michelle                          | Evans      |                       |                  |             |                                          |                                                         |                                                                                            |
| Ryan                              | Evans      |                       |                  |             |                                          |                                                         |                                                                                            |
| Tony                              | Eve        |                       |                  |             |                                          |                                                         |                                                                                            |

Supplemental Online Content: Nonauthor Collaborators

\*Indicates required information. Only first name, last name, and suffix will appear in PubMed.

| *First Name and Middle Initial(s) | *Last Name      | *Suffix (eg, Jr, III) | Academic Degrees | Institution | Location (city, state/province, country) | Role or Contribution, eg, chair, principal investigator | Group (if more than 1 Group listed in the byline) and/or Subgroup (eg, Steering Committee) |
|-----------------------------------|-----------------|-----------------------|------------------|-------------|------------------------------------------|---------------------------------------------------------|--------------------------------------------------------------------------------------------|
| George E                          | Evetts          |                       |                  |             |                                          |                                                         |                                                                                            |
| Laura                             | Fagan           |                       |                  |             |                                          |                                                         |                                                                                            |
| Elizabeth                         | Fagbodun        |                       |                  |             |                                          |                                                         |                                                                                            |
| Pam                               | Fairclough      |                       |                  |             |                                          |                                                         |                                                                                            |
| Jonathan                          | Falconer        |                       |                  |             |                                          |                                                         |                                                                                            |
| Kelly                             | Falle           |                       |                  |             |                                          |                                                         |                                                                                            |
| Neda                              | Farahi          |                       |                  |             |                                          |                                                         |                                                                                            |
| Sarah                             | Farnell-Ward    |                       |                  |             |                                          |                                                         |                                                                                            |
| Maria                             | Faulkner        |                       |                  |             |                                          |                                                         |                                                                                            |
| Kelly                             | Feane           |                       |                  |             |                                          |                                                         |                                                                                            |
| James                             | Feely-Henderson |                       |                  |             |                                          |                                                         |                                                                                            |
| Tim                               | Felton          |                       |                  |             |                                          |                                                         |                                                                                            |
| Gerard                            | Fennessy        |                       |                  |             |                                          |                                                         |                                                                                            |
| Bill                              | Ferguson        |                       |                  |             |                                          |                                                         |                                                                                            |
| Niall                             | Ferguson        |                       |                  |             |                                          |                                                         |                                                                                            |
| Stephanie                         | Ferguson        |                       |                  |             |                                          |                                                         |                                                                                            |
| Susan                             | Ferguson        |                       |                  |             |                                          |                                                         |                                                                                            |
| Maria                             | Fernandez       |                       |                  |             |                                          |                                                         |                                                                                            |
| Jaime                             | Fernandez Roman |                       |                  |             |                                          |                                                         |                                                                                            |
| Gloria                            | Fernando        |                       |                  |             |                                          |                                                         |                                                                                            |
| Xiomara                           | Ferndadez       |                       |                  |             |                                          |                                                         |                                                                                            |
| Cindy                             | Ferringer       |                       |                  |             |                                          |                                                         |                                                                                            |
| Jessica                           | Fesz            |                       |                  |             |                                          |                                                         |                                                                                            |
| Cheryl                            | Finch           |                       |                  |             |                                          |                                                         |                                                                                            |
| Joanne                            | Finden          |                       |                  |             |                                          |                                                         |                                                                                            |
| Stephanie                         | Finn            |                       |                  |             |                                          |                                                         |                                                                                            |
| Andrés                            | Finzi           |                       |                  |             |                                          |                                                         |                                                                                            |
| Dani                              | Fisher          |                       |                  |             |                                          |                                                         |                                                                                            |
| Emily                             | Fisher          |                       |                  |             |                                          |                                                         |                                                                                            |
| Meadow                            | Fisher Crisp    |                       |                  |             |                                          |                                                         |                                                                                            |
| Christina                         | Fitcher         |                       |                  |             |                                          |                                                         |                                                                                            |

Supplemental Online Content: Nonauthor Collaborators

\*Indicates required information. Only first name, last name, and suffix will appear in PubMed.

| *First Name and Middle Initial(s) | *Last Name          | *Suffix (eg, Jr, III) | Academic Degrees | Institution | Location (city, state/province, country) | Role or Contribution, eg, chair, principal investigator | Group (if more than 1 Group listed in the byline) and/or Subgroup (eg, Steering Committee) |
|-----------------------------------|---------------------|-----------------------|------------------|-------------|------------------------------------------|---------------------------------------------------------|--------------------------------------------------------------------------------------------|
| Stephen                           | Fitzgibbon          |                       |                  |             |                                          |                                                         |                                                                                            |
| Elaine                            | Fitzimmons          |                       |                  |             |                                          |                                                         |                                                                                            |
| Meghan                            | Fitzpatrick         |                       |                  |             |                                          |                                                         |                                                                                            |
| Chloe                             | Fitzpatrick-Creamer |                       |                  |             |                                          |                                                         |                                                                                            |
| Cathy                             | Flatters            |                       |                  |             |                                          |                                                         |                                                                                            |
| Simon                             | Fletcher            |                       |                  |             |                                          |                                                         |                                                                                            |
| Kelly                             | Flynn               |                       |                  |             |                                          |                                                         |                                                                                            |
| Sara                              | Flynn               |                       |                  |             |                                          |                                                         |                                                                                            |
| Evodian                           | Fonyonga            |                       |                  |             |                                          |                                                         |                                                                                            |
| Andrew                            | Forbes              |                       |                  |             |                                          |                                                         |                                                                                            |
| Loretta                           | Forbes              |                       |                  |             |                                          |                                                         |                                                                                            |
| Kathy                             | Ford                |                       |                  |             |                                          |                                                         |                                                                                            |
| Sara                              | Ford                |                       |                  |             |                                          |                                                         |                                                                                            |
| Elliot                            | Forster             |                       |                  |             |                                          |                                                         |                                                                                            |
| Kirsten                           | Foster              |                       |                  |             |                                          |                                                         |                                                                                            |
| Terrie                            | Foster              |                       |                  |             |                                          |                                                         |                                                                                            |
| Tracy                             | Foster              |                       |                  |             |                                          |                                                         |                                                                                            |
| Deirdre                           | Fottrell-Gould      |                       |                  |             |                                          |                                                         |                                                                                            |
| Angela                            | Foulds              |                       |                  |             |                                          |                                                         |                                                                                            |
| Dora                              | Founkaneli          |                       |                  |             |                                          |                                                         |                                                                                            |
| Marie-Josée                       | Fournier            |                       |                  |             |                                          |                                                         |                                                                                            |
| Rob                               | Fowler              |                       |                  |             |                                          |                                                         |                                                                                            |
| Claire                            | Fox                 |                       |                  |             |                                          |                                                         |                                                                                            |
| Daniel                            | Fox                 |                       |                  |             |                                          |                                                         |                                                                                            |
| Eleonore                          | Fox                 |                       |                  |             |                                          |                                                         |                                                                                            |
| Glenda                            | Fox                 |                       |                  |             |                                          |                                                         |                                                                                            |
| Yasin                             | Fozdar              |                       |                  |             |                                          |                                                         |                                                                                            |
| Charles                           | Francoeur           |                       |                  |             |                                          |                                                         |                                                                                            |
| Bruno                             | Francois            |                       |                  |             |                                          |                                                         |                                                                                            |
| Jason                             | Frankcam            |                       |                  |             |                                          |                                                         |                                                                                            |
| Claudia                           | Frankfurter         |                       |                  |             |                                          |                                                         |                                                                                            |

Supplemental Online Content: Nonauthor Collaborators

\*Indicates required information. Only first name, last name, and suffix will appear in PubMed.

| *First Name and Middle Initial(s) | *Last Name    | *Suffix (eg, Jr, III) | Academic Degrees | Institution | Location (city, state/province, country) | Role or Contribution, eg, chair, principal investigator | Group (if more than 1 Group listed in the byline) and/or Subgroup (eg, Steering Committee) |
|-----------------------------------|---------------|-----------------------|------------------|-------------|------------------------------------------|---------------------------------------------------------|--------------------------------------------------------------------------------------------|
| Gayle                             | Franklin      |                       |                  |             |                                          |                                                         |                                                                                            |
| Darron                            | Franks        |                       |                  |             |                                          |                                                         |                                                                                            |
| Christopher                       | Franz         |                       |                  |             |                                          |                                                         |                                                                                            |
| Alasdair                          | Frater        |                       |                  |             |                                          |                                                         |                                                                                            |
| Matthew                           | Free          |                       |                  |             |                                          |                                                         |                                                                                            |
| Ian                               | Freestone     |                       |                  |             |                                          |                                                         |                                                                                            |
| Craig                             | French        |                       |                  |             |                                          |                                                         |                                                                                            |
| Christian                         | Frey          |                       |                  |             |                                          |                                                         |                                                                                            |
| Liesa                             | Friedrich     |                       |                  |             |                                          |                                                         |                                                                                            |
| Beth                              | Frise         |                       |                  |             |                                          |                                                         |                                                                                            |
| Matthew                           | Frise         |                       |                  |             |                                          |                                                         |                                                                                            |
| Jake                              | Fryer         |                       |                  |             |                                          |                                                         |                                                                                            |
| Jenny                             | Fullthorpe    |                       |                  |             |                                          |                                                         |                                                                                            |
| Charlene                          | Furtado       |                       |                  |             |                                          |                                                         |                                                                                            |
| Rose                              | Gad           |                       |                  |             |                                          |                                                         |                                                                                            |
| Hélène                            | Gagné         |                       |                  |             |                                          |                                                         |                                                                                            |
| Louis-Philipp                     | Gagné         |                       |                  |             |                                          |                                                         |                                                                                            |
| James                             | Galea         |                       |                  |             |                                          |                                                         |                                                                                            |
| Ashley                            | Gallant       |                       |                  |             |                                          |                                                         |                                                                                            |
| Koreena                           | Gallant       |                       |                  |             |                                          |                                                         |                                                                                            |
| Arunkumar                         | Ganesan       |                       |                  |             |                                          |                                                         |                                                                                            |
| Saibal                            | Ganguly       |                       |                  |             |                                          |                                                         |                                                                                            |
| Radhika                           | Ganpat        |                       |                  |             |                                          |                                                         |                                                                                            |
| Caroline                          | Gardiner-Hill |                       |                  |             |                                          |                                                         |                                                                                            |
| Cindy                             | Gardner       |                       |                  |             |                                          |                                                         |                                                                                            |
| Jocelynn                          | Gardner       |                       |                  |             |                                          |                                                         |                                                                                            |
| Robert                            | Garney        |                       |                  |             |                                          |                                                         |                                                                                            |
| Hywel                             | Garrard       |                       |                  |             |                                          |                                                         |                                                                                            |
| William                           | Garrard       |                       |                  |             |                                          |                                                         |                                                                                            |
| Peter                             | Garrett       |                       |                  |             |                                          |                                                         |                                                                                            |
| Michael                           | Garstka       |                       |                  |             |                                          |                                                         |                                                                                            |



Supplemental Online Content: Nonauthor Collaborators

\*Indicates required information. Only first name, last name, and suffix will appear in PubMed.

| *First Name and Middle Initial(s) | *Last Name     | *Suffix (eg, Jr, III) | Academic Degrees | Institution | Location (city, state/province, country) | Role or Contribution, eg, chair, principal investigator | Group (if more than 1 Group listed in the byline) and/or Subgroup (eg, Steering Committee) |
|-----------------------------------|----------------|-----------------------|------------------|-------------|------------------------------------------|---------------------------------------------------------|--------------------------------------------------------------------------------------------|
| Mark                              | Garton         |                       |                  |             |                                          |                                                         |                                                                                            |
| Simon                             | Gates          |                       |                  |             |                                          |                                                         |                                                                                            |
| David                             | Gattas         |                       |                  |             |                                          |                                                         |                                                                                            |
| Kim                               | Gaudet         |                       |                  |             |                                          |                                                         |                                                                                            |
| Amaury                            | Gausson        |                       |                  |             |                                          |                                                         |                                                                                            |
| Jane                              | Gaylard        |                       |                  |             |                                          |                                                         |                                                                                            |
| Julie                             | Gazmen         |                       |                  |             |                                          |                                                         |                                                                                            |
| Alison                            | Geddis         |                       |                  |             |                                          |                                                         |                                                                                            |
| Minerva                           | Gellamucho     |                       |                  |             |                                          |                                                         |                                                                                            |
| Lisa                              | Gemmell        |                       |                  |             |                                          |                                                         |                                                                                            |
| Gabrielle                         | Gendron-Lepage |                       |                  |             |                                          |                                                         |                                                                                            |
| Wenli                             | Geng           |                       |                  |             |                                          |                                                         |                                                                                            |
| Chloe                             | George         |                       |                  |             |                                          |                                                         |                                                                                            |
| Marc                              | Germain        |                       |                  |             |                                          |                                                         |                                                                                            |
| Mehrdad                           | Ghaffari       |                       |                  |             |                                          |                                                         |                                                                                            |
| Ali                               | Ghamraoui      |                       |                  |             |                                          |                                                         |                                                                                            |
| Amardeep                          | Ghattaoraya    |                       |                  |             |                                          |                                                         |                                                                                            |
| Alison                            | Ghosh          |                       |                  |             |                                          |                                                         |                                                                                            |
| Andrew                            | Gibb           |                       |                  |             |                                          |                                                         |                                                                                            |
| Joel                              | Gilchrist      |                       |                  |             |                                          |                                                         |                                                                                            |
| Sean                              | Gilchrist      |                       |                  |             |                                          |                                                         |                                                                                            |
| Balkar                            | Gill           |                       |                  |             |                                          |                                                         |                                                                                            |
| Mandy                             | Gill           |                       |                  |             |                                          |                                                         |                                                                                            |
| Matt                              | Gillespie      |                       |                  |             |                                          |                                                         |                                                                                            |
| Kate                              | Gilmour        |                       |                  |             |                                          |                                                         |                                                                                            |
| Lorrie                            | Giorgi         |                       |                  |             |                                          |                                                         |                                                                                            |
| Sébastien                         | Girard         |                       |                  |             |                                          |                                                         |                                                                                            |
| Timothy                           | Girard         |                       |                  |             |                                          |                                                         |                                                                                            |
| Donald                            | Gironne        |                       |                  |             |                                          |                                                         |                                                                                            |
| Kirsty                            | Gladas         |                       |                  |             |                                          |                                                         |                                                                                            |
| Kathleen                          | Glasby         |                       |                  |             |                                          |                                                         |                                                                                            |

Supplemental Online Content: Nonauthor Collaborators

\*Indicates required information. Only first name, last name, and suffix will appear in PubMed.

| *First Name and Middle Initial(s) | *Last Name      | *Suffix (eg, Jr, III) | Academic Degrees | Institution | Location (city, state/province, country) | Role or Contribution, eg, chair, principal investigator | Group (if more than 1 Group listed in the byline) and/or Subgroup (eg, Steering Committee) |
|-----------------------------------|-----------------|-----------------------|------------------|-------------|------------------------------------------|---------------------------------------------------------|--------------------------------------------------------------------------------------------|
| Leah                              | Glasgow         |                       |                  |             |                                          |                                                         |                                                                                            |
| Rayna                             | Glazenburg      |                       |                  |             |                                          |                                                         |                                                                                            |
| Lisa                              | Gledhill        |                       |                  |             |                                          |                                                         |                                                                                            |
| Samuel                            | Gluck           |                       |                  |             |                                          |                                                         |                                                                                            |
| Wendy                             | Goddard         |                       |                  |             |                                          |                                                         |                                                                                            |
| Gillian                           | Godding         |                       |                  |             |                                          |                                                         |                                                                                            |
| Gerry                             | Gogarty         |                       |                  |             |                                          |                                                         |                                                                                            |
| Philip                            | Gold            |                       |                  |             |                                          |                                                         |                                                                                            |
| David                             | Golden          |                       |                  |             |                                          |                                                         |                                                                                            |
| Ewan C                            | Goligher        |                       |                  |             |                                          |                                                         |                                                                                            |
| Keith                             | Gomez           |                       |                  |             |                                          |                                                         |                                                                                            |
| Frank                             | Gommans         |                       |                  |             |                                          |                                                         |                                                                                            |
| Marta                             | Goncalves Pinto |                       |                  |             |                                          |                                                         |                                                                                            |
| Tiphanie                          | Gonzales        |                       |                  |             |                                          |                                                         |                                                                                            |
| Anaita                            | Goodie          |                       |                  |             |                                          |                                                         |                                                                                            |
| Jayne                             | Goodwin         |                       |                  |             |                                          |                                                         |                                                                                            |
| Sharif                            | Goolam-Hossen   |                       |                  |             |                                          |                                                         |                                                                                            |
| Shameer                           | Gopal           |                       |                  |             |                                          |                                                         |                                                                                            |
| Jan                               | Gorry           |                       |                  |             |                                          |                                                         |                                                                                            |
| Richard                           | Gould           |                       |                  |             |                                          |                                                         |                                                                                            |
| Jessica                           | Goulet          |                       |                  |             |                                          |                                                         |                                                                                            |
| Anna                              | Gouveia         |                       |                  |             |                                          |                                                         |                                                                                            |
| Pauline                           | Gowdy           |                       |                  |             |                                          |                                                         |                                                                                            |
| Guillaume                         | Goyette         |                       |                  |             |                                          |                                                         |                                                                                            |
| Beverley                          | Graham          |                       |                  |             |                                          |                                                         |                                                                                            |
| Jane                              | Graham          |                       |                  |             |                                          |                                                         |                                                                                            |
| Libby                             | Graham          |                       |                  |             |                                          |                                                         |                                                                                            |
| Harriet                           | Gray            |                       |                  |             |                                          |                                                         |                                                                                            |
| Ingrid                            | Gray            |                       |                  |             |                                          |                                                         |                                                                                            |
| Tanya                             | Gray            |                       |                  |             |                                          |                                                         |                                                                                            |

Supplemental Online Content: Nonauthor Collaborators

\*Indicates required information. Only first name, last name, and suffix will appear in PubMed.

| *First Name and Middle Initial(s) | *Last Name     | *Suffix (eg, Jr, III) | Academic Degrees | Institution | Location (city, state/province, country) | Role or Contribution, eg, chair, principal investigator | Group (if more than 1 Group listed in the byline) and/or Subgroup (eg, Steering Committee) |
|-----------------------------------|----------------|-----------------------|------------------|-------------|------------------------------------------|---------------------------------------------------------|--------------------------------------------------------------------------------------------|
| Maria Cecilia                     | Graza          |                       |                  |             |                                          |                                                         |                                                                                            |
| Patricia                          | Grealish       |                       |                  |             |                                          |                                                         |                                                                                            |
| Irina                             | Greco          |                       |                  |             |                                          |                                                         |                                                                                            |
| Grace                             | Green          |                       |                  |             |                                          |                                                         |                                                                                            |
| Jackie                            | Green          |                       |                  |             |                                          |                                                         |                                                                                            |
| Teresa                            | Green          |                       |                  |             |                                          |                                                         |                                                                                            |
| Teresa                            | Green          |                       |                  |             |                                          |                                                         |                                                                                            |
| Danni                             | Greener        |                       |                  |             |                                          |                                                         |                                                                                            |
| Jane                              | Gregory        |                       |                  |             |                                          |                                                         |                                                                                            |
| Beverley                          | Grice          |                       |                  |             |                                          |                                                         |                                                                                            |
| Amanda                            | Griffith       |                       |                  |             |                                          |                                                         |                                                                                            |
| Alexandra                         | Griffiths      |                       |                  |             |                                          |                                                         |                                                                                            |
| Samantha                          | Grimley        |                       |                  |             |                                          |                                                         |                                                                                            |
| Lisa                              | Grimmer        |                       |                  |             |                                          |                                                         |                                                                                            |
| Stephen                           | Grist          |                       |                  |             |                                          |                                                         |                                                                                            |
| Erika                             | Groenveld      |                       |                  |             |                                          |                                                         |                                                                                            |
| Jamie                             | Gross          |                       |                  |             |                                          |                                                         |                                                                                            |
| Elodie                            | Guitteaud      |                       |                  |             |                                          |                                                         |                                                                                            |
| Abhinav                           | Gupta          |                       |                  |             |                                          |                                                         |                                                                                            |
| Chiraag                           | Gupta          |                       |                  |             |                                          |                                                         |                                                                                            |
| Sabi                              | Gurung Rai     |                       |                  |             |                                          |                                                         |                                                                                            |
| Wadih                             | Habeichi       |                       |                  |             |                                          |                                                         |                                                                                            |
| Sarah                             | Habel Liboiron |                       |                  |             |                                          |                                                         |                                                                                            |
| Bernard                           | Hadebe         |                       |                  |             |                                          |                                                         |                                                                                            |
| Leah                              | Hadzik         |                       |                  |             |                                          |                                                         |                                                                                            |
| Ghady                             | Haidar         |                       |                  |             |                                          |                                                         |                                                                                            |
| Syeda                             | Haider         |                       |                  |             |                                          |                                                         |                                                                                            |
| Sandra                            | Halden         |                       |                  |             |                                          |                                                         |                                                                                            |
| Anne                              | Haldeos        |                       |                  |             |                                          |                                                         |                                                                                            |
| Alistair S                        | Hall           |                       |                  |             |                                          |                                                         |                                                                                            |
| Andrew                            | Hall           |                       |                  |             |                                          |                                                         |                                                                                            |

Supplemental Online Content: Nonauthor Collaborators

\*Indicates required information. Only first name, last name, and suffix will appear in PubMed.

| *First Name and Middle Initial(s) | *Last Name | *Suffix (eg, Jr, III) | Academic Degrees | Institution | Location (city, state/province, country) | Role or Contribution, eg, chair, principal investigator | Group (if more than 1 Group listed in the byline) and/or Subgroup (eg, Steering Committee) |
|-----------------------------------|------------|-----------------------|------------------|-------------|------------------------------------------|---------------------------------------------------------|--------------------------------------------------------------------------------------------|
| Emma                              | Hall       |                       |                  |             |                                          |                                                         |                                                                                            |
| Kathryn                           | Hall       |                       |                  |             |                                          |                                                         |                                                                                            |
| Rebecca Elin                      | Hall       |                       |                  |             |                                          |                                                         |                                                                                            |
| Sandra                            | Halliday   |                       |                  |             |                                          |                                                         |                                                                                            |
| David O                           | Hamilton   |                       |                  |             |                                          |                                                         |                                                                                            |
| Vincent                           | Hamlyn     |                       |                  |             |                                          |                                                         |                                                                                            |
| Naomi                             | Hammond    |                       |                  |             |                                          |                                                         |                                                                                            |
| Sara                              | Hammond    |                       |                  |             |                                          |                                                         |                                                                                            |
| Elizabeth                         | Hampson    |                       |                  |             |                                          |                                                         |                                                                                            |
| Ian                               | Hancock    |                       |                  |             |                                          |                                                         |                                                                                            |
| Katie                             | Hands      |                       |                  |             |                                          |                                                         |                                                                                            |
| Joanne                            | Hanley     |                       |                  |             |                                          |                                                         |                                                                                            |
| Alison                            | Hanlon     |                       |                  |             |                                          |                                                         |                                                                                            |
| Tracy                             | Hanna      |                       |                  |             |                                          |                                                         |                                                                                            |
| Stefanie                          | Hannan     |                       |                  |             |                                          |                                                         |                                                                                            |
| Trish                             | Hansen     |                       |                  |             |                                          |                                                         |                                                                                            |
| Helen                             | Hanson     |                       |                  |             |                                          |                                                         |                                                                                            |
| Jane                              | Hanson     |                       |                  |             |                                          |                                                         |                                                                                            |
| Helen                             | Hanwell    |                       |                  |             |                                          |                                                         |                                                                                            |
| Lesley                            | Harden     |                       |                  |             |                                          |                                                         |                                                                                            |
| Chloe                             | Hardy      |                       |                  |             |                                          |                                                         |                                                                                            |
| Rachel                            | Harford    |                       |                  |             |                                          |                                                         |                                                                                            |
| Emily                             | Hargreaves |                       |                  |             |                                          |                                                         |                                                                                            |
| Cain                              | Harland    |                       |                  |             |                                          |                                                         |                                                                                            |
| Sandra                            | Harlow     |                       |                  |             |                                          |                                                         |                                                                                            |
| Fiona                             | Harper     |                       |                  |             |                                          |                                                         |                                                                                            |
| Heather                           | Harper     |                       |                  |             |                                          |                                                         |                                                                                            |
| Melanie                           | Harper     |                       |                  |             |                                          |                                                         |                                                                                            |
| Naja                              | Harper     |                       |                  |             |                                          |                                                         |                                                                                            |
| Kate                              | Harrington |                       |                  |             |                                          |                                                         |                                                                                            |
| Celia                             | Harris     |                       |                  |             |                                          |                                                         |                                                                                            |

Supplemental Online Content: Nonauthor Collaborators

\*Indicates required information. Only first name, last name, and suffix will appear in PubMed.

| *First Name and Middle Initial(s) | *Last Name | *Suffix (eg, Jr, III) | Academic Degrees | Institution | Location (city, state/province, country) | Role or Contribution, eg, chair, principal investigator | Group (if more than 1 Group listed in the byline) and/or Subgroup (eg, Steering Committee) |
|-----------------------------------|------------|-----------------------|------------------|-------------|------------------------------------------|---------------------------------------------------------|--------------------------------------------------------------------------------------------|
| Jade                              | Harris     |                       |                  |             |                                          |                                                         |                                                                                            |
| Naomi                             | Harris     |                       |                  |             |                                          |                                                         |                                                                                            |
| Susan                             | Harrison   |                       |                  |             |                                          |                                                         |                                                                                            |
| Kath                              | Harrow     |                       |                  |             |                                          |                                                         |                                                                                            |
| Melissa                           | Hartley    |                       |                  |             |                                          |                                                         |                                                                                            |
| Alice                             | Harvey     |                       |                  |             |                                          |                                                         |                                                                                            |
| Daniel                            | Harvey     |                       |                  |             |                                          |                                                         |                                                                                            |
| Meg                               | Harward    |                       |                  |             |                                          |                                                         |                                                                                            |
| Madiha                            | Hashmi     |                       |                  |             |                                          |                                                         |                                                                                            |
| Sarah                             | Haskins    |                       |                  |             |                                          |                                                         |                                                                                            |
| Stephanie B.                      | Hatch      |                       |                  |             |                                          |                                                         |                                                                                            |
| Sheryl                            | Haviland   |                       |                  |             |                                          |                                                         |                                                                                            |
| Janice                            | Hawes      |                       |                  |             |                                          |                                                         |                                                                                            |
| Catherine                         | Hawkins    |                       |                  |             |                                          |                                                         |                                                                                            |
| Nancy                             | Hawkins    |                       |                  |             |                                          |                                                         |                                                                                            |
| Tanya                             | Hawkins    |                       |                  |             |                                          |                                                         |                                                                                            |
| Sophie K                          | Hay        |                       |                  |             |                                          |                                                         |                                                                                            |
| Tamsin                            | Haydon     |                       |                  |             |                                          |                                                         |                                                                                            |
| Amber                             | Hayes      |                       |                  |             |                                          |                                                         |                                                                                            |
| Anne                              | Hayes      |                       |                  |             |                                          |                                                         |                                                                                            |
| Ooi                               | Hc         |                       |                  |             |                                          |                                                         |                                                                                            |
| William                           | Headdon    |                       |                  |             |                                          |                                                         |                                                                                            |
| Gail                              | Healey     |                       |                  |             |                                          |                                                         |                                                                                            |
| Anita                             | Hebert     |                       |                  |             |                                          |                                                         |                                                                                            |
| Steven                            | Henderson  |                       |                  |             |                                          |                                                         |                                                                                            |
| Heather                           | Hennebury  |                       |                  |             |                                          |                                                         |                                                                                            |
| Lee                               | Hennen     |                       |                  |             |                                          |                                                         |                                                                                            |
| Kathryn                           | Hennessy   |                       |                  |             |                                          |                                                         |                                                                                            |
| Jeremy                            | Henning    |                       |                  |             |                                          |                                                         |                                                                                            |
| Carol Ann                         | Henry      |                       |                  |             |                                          |                                                         |                                                                                            |
| Carole Anne                       | Henry      |                       |                  |             |                                          |                                                         |                                                                                            |

Supplemental Online Content: Nonauthor Collaborators

\*Indicates required information. Only first name, last name, and suffix will appear in PubMed.

| *First Name and Middle Initial(s) | *Last Name | *Suffix (eg, Jr, III) | Academic Degrees | Institution | Location (city, state/province, country) | Role or Contribution, eg, chair, principal investigator | Group (if more than 1 Group listed in the byline) and/or Subgroup (eg, Steering Committee) |
|-----------------------------------|------------|-----------------------|------------------|-------------|------------------------------------------|---------------------------------------------------------|--------------------------------------------------------------------------------------------|
| Joanne                            | Henry      |                       |                  |             |                                          |                                                         |                                                                                            |
| Rachel                            | Hera       |                       |                  |             |                                          |                                                         |                                                                                            |
| Mike                              | Herbert    |                       |                  |             |                                          |                                                         |                                                                                            |
| Stephanie                         | Heritier   |                       |                  |             |                                          |                                                         |                                                                                            |
| Kay                               | Heron      |                       |                  |             |                                          |                                                         |                                                                                            |
| Tanya                             | Herrell    |                       |                  |             |                                          |                                                         |                                                                                            |
| Sharnie Beth                      | Hesson     |                       |                  |             |                                          |                                                         |                                                                                            |
| Samuel                            | Hey        |                       |                  |             |                                          |                                                         |                                                                                            |
| Nicolette                         | Heydon     |                       |                  |             |                                          |                                                         |                                                                                            |
|                                   | Heywood-   |                       |                  |             |                                          |                                                         |                                                                                            |
| Gareth                            | Beldon     |                       |                  |             |                                          |                                                         |                                                                                            |
| John                              | Hickey     |                       |                  |             |                                          |                                                         |                                                                                            |
| Alison                            | Hill       |                       |                  |             |                                          |                                                         |                                                                                            |
| Claire                            | Hill       |                       |                  |             |                                          |                                                         |                                                                                            |
| Helen                             | Hill       |                       |                  |             |                                          |                                                         |                                                                                            |
| Martin                            | Hill       |                       |                  |             |                                          |                                                         |                                                                                            |
| Michael                           | Hill       |                       |                  |             |                                          |                                                         |                                                                                            |
| Anette                            | Hilldrith  |                       |                  |             |                                          |                                                         |                                                                                            |
| Elizabeth                         | Hillerby   |                       |                  |             |                                          |                                                         |                                                                                            |
| Elisabeth                         | Hilton     |                       |                  |             |                                          |                                                         |                                                                                            |
| Marcus                            | Hinde      |                       |                  |             |                                          |                                                         |                                                                                            |
| Clare                             | Hird       |                       |                  |             |                                          |                                                         |                                                                                            |
| Joan                              | Hoar       |                       |                  |             |                                          |                                                         |                                                                                            |
| Valerie                           | Hodder     |                       |                  |             |                                          |                                                         |                                                                                            |
| Christopher                       | Hodge      |                       |                  |             |                                          |                                                         |                                                                                            |
| Renate                            | Hodge      |                       |                  |             |                                          |                                                         |                                                                                            |
| Louise                            | Hodgkinson |                       |                  |             |                                          |                                                         |                                                                                            |
| Carol                             | Hodgson    |                       |                  |             |                                          |                                                         |                                                                                            |
| Helen                             | Hodgson    |                       |                  |             |                                          |                                                         |                                                                                            |
| Karen                             | Hoiland    |                       |                  |             |                                          |                                                         |                                                                                            |
| Catherine                         | Holbrook   |                       |                  |             |                                          |                                                         |                                                                                            |

Supplemental Online Content: Nonauthor Collaborators

\*Indicates required information. Only first name, last name, and suffix will appear in PubMed.

| *First Name and Middle Initial(s) | *Last Name        | *Suffix (eg, Jr, III) | Academic Degrees | Institution | Location (city, state/province, country) | Role or Contribution, eg, chair, principal investigator | Group (if more than 1 Group listed in the byline) and/or Subgroup (eg, Steering Committee) |
|-----------------------------------|-------------------|-----------------------|------------------|-------------|------------------------------------------|---------------------------------------------------------|--------------------------------------------------------------------------------------------|
| Andrew                            | Holland           |                       |                  |             |                                          |                                                         |                                                                                            |
| Nicky                             | Holland           |                       |                  |             |                                          |                                                         |                                                                                            |
| Susan                             | Holland           |                       |                  |             |                                          |                                                         |                                                                                            |
| Michelle                          | Hollands          |                       |                  |             |                                          |                                                         |                                                                                            |
| Gillian                           | Hollis            |                       |                  |             |                                          |                                                         |                                                                                            |
| Laszlo                            | Hollos            |                       |                  |             |                                          |                                                         |                                                                                            |
| Linda                             | Holloway          |                       |                  |             |                                          |                                                         |                                                                                            |
| Ben                               | Holmes            |                       |                  |             |                                          |                                                         |                                                                                            |
| Lynn                              | Holt              |                       |                  |             |                                          |                                                         |                                                                                            |
| Toni                              | Home              |                       |                  |             |                                          |                                                         |                                                                                            |
| Laura                             | Hontoria del Hoyo |                       |                  |             |                                          |                                                         |                                                                                            |
| Patti                             | Hooley            |                       |                  |             |                                          |                                                         |                                                                                            |
| Sarah J.                          | Hoosdally         |                       |                  |             |                                          |                                                         |                                                                                            |
| David                             | Hope              |                       |                  |             |                                          |                                                         |                                                                                            |
| Phil                              | Hopkins           |                       |                  |             |                                          |                                                         |                                                                                            |
| Anil                              | Hormis            |                       |                  |             |                                          |                                                         |                                                                                            |
| Kim                               | Horne             |                       |                  |             |                                          |                                                         |                                                                                            |
| Dan                               | Horner            |                       |                  |             |                                          |                                                         |                                                                                            |
| James                             | Hornsby           |                       |                  |             |                                          |                                                         |                                                                                            |
| Nicola                            | Horton-Turner     |                       |                  |             |                                          |                                                         |                                                                                            |
| Krissy                            | Hoskin            |                       |                  |             |                                          |                                                         |                                                                                            |
| Leanne                            | Hostler           |                       |                  |             |                                          |                                                         |                                                                                            |
| Pat                               | Hoszko            |                       |                  |             |                                          |                                                         |                                                                                            |
| Brittany                          | Houghton          |                       |                  |             |                                          |                                                         |                                                                                            |
| Iain                              | Houghton          |                       |                  |             |                                          |                                                         |                                                                                            |
| Angela                            | Houston           |                       |                  |             |                                          |                                                         |                                                                                            |
| Brett L                           | Houston           |                       |                  |             |                                          |                                                         |                                                                                            |
| Kelsey                            | Howard            |                       |                  |             |                                          |                                                         |                                                                                            |
| Alison                            | Howarth           |                       |                  |             |                                          |                                                         |                                                                                            |
| Diane                             | Howarth           |                       |                  |             |                                          |                                                         |                                                                                            |
| Clare                             | Howcroft          |                       |                  |             |                                          |                                                         |                                                                                            |

Supplemental Online Content: Nonauthor Collaborators

\*Indicates required information. Only first name, last name, and suffix will appear in PubMed.

| *First Name and Middle Initial(s) | *Last Name  | *Suffix (eg, Jr, III) | Academic Degrees | Institution | Location (city, state/province, country) | Role or Contribution, eg, chair, principal investigator | Group (if more than 1 Group listed in the byline) and/or Subgroup (eg, Steering Committee) |
|-----------------------------------|-------------|-----------------------|------------------|-------------|------------------------------------------|---------------------------------------------------------|--------------------------------------------------------------------------------------------|
| David                             | Howe        |                       |                  |             |                                          |                                                         |                                                                                            |
| Lucy                              | Howie       |                       |                  |             |                                          |                                                         |                                                                                            |
| Ryan                              | Howle       |                       |                  |             |                                          |                                                         |                                                                                            |
| Colleen                           | Hrabi       |                       |                  |             |                                          |                                                         |                                                                                            |
| Kjierstin                         | Hubka       |                       |                  |             |                                          |                                                         |                                                                                            |
| Alex                              | Hudson      |                       |                  |             |                                          |                                                         |                                                                                            |
| Chelsey                           | Hugelshofer |                       |                  |             |                                          |                                                         |                                                                                            |
| Debbie                            | Hughes      |                       |                  |             |                                          |                                                         |                                                                                            |
| Luke                              | Hughes      |                       |                  |             |                                          |                                                         |                                                                                            |
| Keith                             | Hugill      |                       |                  |             |                                          |                                                         |                                                                                            |
| Sebastiaan                        | Hullegie    |                       |                  |             |                                          |                                                         |                                                                                            |
| Jonathan                          | Hulme       |                       |                  |             |                                          |                                                         |                                                                                            |
| Sarah                             | Hulse       |                       |                  |             |                                          |                                                         |                                                                                            |
| Laura                             | Humber      |                       |                  |             |                                          |                                                         |                                                                                            |
| Charlotte                         | Humphrey    |                       |                  |             |                                          |                                                         |                                                                                            |
| Lena                              | Hunold      |                       |                  |             |                                          |                                                         |                                                                                            |
| Beverley                          | Hunt        |                       |                  |             |                                          |                                                         |                                                                                            |
| Al                                | Hunter      |                       |                  |             |                                          |                                                         |                                                                                            |
| Isobel                            | Hunter      |                       |                  |             |                                          |                                                         |                                                                                            |
| Sally-Anne                        | Hurford     |                       |                  |             |                                          |                                                         |                                                                                            |
| Roberta                           | Hurman      |                       |                  |             |                                          |                                                         |                                                                                            |
| Mahwish                           | Hussain     |                       |                  |             |                                          |                                                         |                                                                                            |
| Raheem                            | Hussein     |                       |                  |             |                                          |                                                         |                                                                                            |
| Alison                            | Hutchinson  |                       |                  |             |                                          |                                                         |                                                                                            |
| Paula                             | Hutton      |                       |                  |             |                                          |                                                         |                                                                                            |
| Monzeer                           | Ibrahim     |                       |                  |             |                                          |                                                         |                                                                                            |
| Nazia                             | Ijaz        |                       |                  |             |                                          |                                                         |                                                                                            |
| Claire                            | Ingall      |                       |                  |             |                                          |                                                         |                                                                                            |
| Richard                           | Innes       |                       |                  |             |                                          |                                                         |                                                                                            |
| Ben                               | Irving      |                       |                  |             |                                          |                                                         |                                                                                            |
| Pamela                            | Irving      |                       |                  |             |                                          |                                                         |                                                                                            |



Supplemental Online Content: Nonauthor Collaborators

\*Indicates required information. Only first name, last name, and suffix will appear in PubMed.

| *First Name and Middle Initial(s) | *Last Name     | *Suffix (eg, Jr, III) | Academic Degrees | Institution | Location (city, state/province, country) | Role or Contribution, eg, chair, principal investigator | Group (if more than 1 Group listed in the byline) and/or Subgroup (eg, Steering Committee) |
|-----------------------------------|----------------|-----------------------|------------------|-------------|------------------------------------------|---------------------------------------------------------|--------------------------------------------------------------------------------------------|
| Sonia                             | Isaacs         |                       |                  |             |                                          |                                                         |                                                                                            |
| Graziella                         | Isgro          |                       |                  |             |                                          |                                                         |                                                                                            |
| Agah                              | Isguzar        |                       |                  |             |                                          |                                                         |                                                                                            |
| Pramodya                          | Ishani         |                       |                  |             |                                          |                                                         |                                                                                            |
| Sue                               | Ismay          |                       |                  |             |                                          |                                                         |                                                                                            |
| Tammy                             | Ison           |                       |                  |             |                                          |                                                         |                                                                                            |
| Ali                               | Issa           |                       |                  |             |                                          |                                                         |                                                                                            |
| Helen                             | Ivatt          |                       |                  |             |                                          |                                                         |                                                                                            |
| Catrina                           | Ivel           |                       |                  |             |                                          |                                                         |                                                                                            |
| Anthony                           | Jackson        |                       |                  |             |                                          |                                                         |                                                                                            |
| Douglas                           | Jackson        |                       |                  |             |                                          |                                                         |                                                                                            |
| Julie                             | Jackson        |                       |                  |             |                                          |                                                         |                                                                                            |
| Karin                             | Jackson        |                       |                  |             |                                          |                                                         |                                                                                            |
| Shane                             | Jackson        |                       |                  |             |                                          |                                                         |                                                                                            |
| Sharon                            | Jackson        |                       |                  |             |                                          |                                                         |                                                                                            |
| Susan                             | Jackson        |                       |                  |             |                                          |                                                         |                                                                                            |
| Nikita                            | Jacob          |                       |                  |             |                                          |                                                         |                                                                                            |
| Reni                              | Jacob          |                       |                  |             |                                          |                                                         |                                                                                            |
| Annie                             | Jacques        |                       |                  |             |                                          |                                                         |                                                                                            |
| Terri-Lisa                        | Jacques- Brown |                       |                  |             |                                          |                                                         |                                                                                            |
| Vijay                             | Jagannathan    |                       |                  |             |                                          |                                                         |                                                                                            |
| Sam                               | Jaggard        |                       |                  |             |                                          |                                                         |                                                                                            |
| Susan                             | Jain           |                       |                  |             |                                          |                                                         |                                                                                            |
| Christie                          | James          |                       |                  |             |                                          |                                                         |                                                                                            |
| Erin                              | Jamula         |                       |                  |             |                                          |                                                         |                                                                                            |
| Ho                                | Jan Senya      |                       |                  |             |                                          |                                                         |                                                                                            |
| Pierre                            | Janin          |                       |                  |             |                                          |                                                         |                                                                                            |
| Lorraine                          | Jappy          |                       |                  |             |                                          |                                                         |                                                                                            |
| Ann                               | Jarvis         |                       |                  |             |                                          |                                                         |                                                                                            |
| Lisa                              | Jarvis         |                       |                  |             |                                          |                                                         |                                                                                            |

Supplemental Online Content: Nonauthor Collaborators

\*Indicates required information. Only first name, last name, and suffix will appear in PubMed.

| *First Name and Middle Initial(s) | *Last Name            | *Suffix (eg, Jr, III) | Academic Degrees | Institution | Location (city, state/province, country) | Role or Contribution, eg, chair, principal investigator | Group (if more than 1 Group listed in the byline) and/or Subgroup (eg, Steering Committee) |
|-----------------------------------|-----------------------|-----------------------|------------------|-------------|------------------------------------------|---------------------------------------------------------|--------------------------------------------------------------------------------------------|
| Issrah                            | Jawad                 |                       |                  |             |                                          |                                                         |                                                                                            |
| Issrah                            | Jawad                 |                       |                  |             |                                          |                                                         |                                                                                            |
| Devachandran                      | Jayakumar             |                       |                  |             |                                          |                                                         |                                                                                            |
| Malka                             | Jayasinghe Arachchige |                       |                  |             |                                          |                                                         |                                                                                            |
| Zeynab                            | Jeewa                 |                       |                  |             |                                          |                                                         |                                                                                            |
| Emma                              | Jefferson             |                       |                  |             |                                          |                                                         |                                                                                            |
| Jenni                             | Jeffrey               |                       |                  |             |                                          |                                                         |                                                                                            |
| Craig                             | Jenkins               |                       |                  |             |                                          |                                                         |                                                                                            |
| Samuel                            | Jenkins               |                       |                  |             |                                          |                                                         |                                                                                            |
| Sarah                             | Jenkins               |                       |                  |             |                                          |                                                         |                                                                                            |
| Steve                             | Jenkins               |                       |                  |             |                                          |                                                         |                                                                                            |
| Aislinn R                         | Jennings              |                       |                  |             |                                          |                                                         |                                                                                            |
| Rebecca                           | Jennings              |                       |                  |             |                                          |                                                         |                                                                                            |
| Stacey                            | Jennings              |                       |                  |             |                                          |                                                         |                                                                                            |
| Jakob                             | Jeriha                |                       |                  |             |                                          |                                                         |                                                                                            |
| Jeby                              | Jeyachandran          |                       |                  |             |                                          |                                                         |                                                                                            |
| Dharshana                         | Jeyapalan             |                       |                  |             |                                          |                                                         |                                                                                            |
| Rajeev                            | Jha                   |                       |                  |             |                                          |                                                         |                                                                                            |
| Shaman                            | Jhanji                |                       |                  |             |                                          |                                                         |                                                                                            |
| Marcella                          | Jimenez               |                       |                  |             |                                          |                                                         |                                                                                            |
| Maya                              | John                  |                       |                  |             |                                          |                                                         |                                                                                            |
| Sarah                             | John                  |                       |                  |             |                                          |                                                         |                                                                                            |
| Magaret                           | Johns                 |                       |                  |             |                                          |                                                         |                                                                                            |
| David                             | Johnson               |                       |                  |             |                                          |                                                         |                                                                                            |
| David                             | Johnson               |                       |                  |             |                                          |                                                         |                                                                                            |
| Nelsonseelan                      | Johnson               |                       |                  |             |                                          |                                                         |                                                                                            |
| Paul                              | Johnson               |                       |                  |             |                                          |                                                         |                                                                                            |
| Rachel                            | Johnson               |                       |                  |             |                                          |                                                         |                                                                                            |
| Rebekah                           | Johnson               |                       |                  |             |                                          |                                                         |                                                                                            |
| Toby                              | Johnson               |                       |                  |             |                                          |                                                         |                                                                                            |
| Zoe                               | Johnson               |                       |                  |             |                                          |                                                         |                                                                                            |

Supplemental Online Content: Nonauthor Collaborators

\*Indicates required information. Only first name, last name, and suffix will appear in PubMed.

| *First Name and Middle Initial(s) | *Last Name      | *Suffix (eg, Jr, III) | Academic Degrees | Institution | Location (city, state/province, country) | Role or Contribution, eg, chair, principal investigator | Group (if more than 1 Group listed in the byline and/or Subgroup (eg, Steering Committee)) |
|-----------------------------------|-----------------|-----------------------|------------------|-------------|------------------------------------------|---------------------------------------------------------|--------------------------------------------------------------------------------------------|
| Brian                             | Johnston        |                       |                  |             |                                          |                                                         |                                                                                            |
| Laura                             | Johnston        |                       |                  |             |                                          |                                                         |                                                                                            |
| Andrea                            | Jones           |                       |                  |             |                                          |                                                         |                                                                                            |
| Cathy                             | Jones           |                       |                  |             |                                          |                                                         |                                                                                            |
| Deanna                            | Jones           |                       |                  |             |                                          |                                                         |                                                                                            |
| Emily                             | Jones           |                       |                  |             |                                          |                                                         |                                                                                            |
| Hazel                             | Jones           |                       |                  |             |                                          |                                                         |                                                                                            |
| Jamie                             | Jones           |                       |                  |             |                                          |                                                         |                                                                                            |
| Jessica                           | Jones           |                       |                  |             |                                          |                                                         |                                                                                            |
| Jessica                           | Jones           |                       |                  |             |                                          |                                                         |                                                                                            |
| Kevin                             | Jones           |                       |                  |             |                                          |                                                         |                                                                                            |
| Glenda                            | Jorritsma       |                       |                  |             |                                          |                                                         |                                                                                            |
| Annette                           | Jose            |                       |                  |             |                                          |                                                         |                                                                                            |
| Joseph                            | Joseph          |                       |                  |             |                                          |                                                         |                                                                                            |
| Revati                            | Joshi           |                       |                  |             |                                          |                                                         |                                                                                            |
| Vera                              | Juhaz           |                       |                  |             |                                          |                                                         |                                                                                            |
| Katarina                          | Kacinova        |                       |                  |             |                                          |                                                         |                                                                                            |
| Rebecca                           | Kahari          |                       |                  |             |                                          |                                                         |                                                                                            |
| Selver                            | Kalchko-Veyssal |                       |                  |             |                                          |                                                         |                                                                                            |
| Kyle                              | Kalchthaler     |                       |                  |             |                                          |                                                         |                                                                                            |
| Agilan                            | Kaliappan       |                       |                  |             |                                          |                                                         |                                                                                            |
| Michael                           | Kalogirou       |                       |                  |             |                                          |                                                         |                                                                                            |
| Maneesha                          | Kamra           |                       |                  |             |                                          |                                                         |                                                                                            |
| Arul                              | Kandaswamy      |                       |                  |             |                                          |                                                         |                                                                                            |
| Santhana                          | Kannan          |                       |                  |             |                                          |                                                         |                                                                                            |
| Vasita                            | Kara            |                       |                  |             |                                          |                                                         |                                                                                            |
| Tim                               | Karachi         |                       |                  |             |                                          |                                                         |                                                                                            |
| Marina                            | Karakantza      |                       |                  |             |                                          |                                                         |                                                                                            |
| Michal                            | Karlikowski     |                       |                  |             |                                          |                                                         |                                                                                            |
| Vidya                             | Kasipandian     |                       |                  |             |                                          |                                                         |                                                                                            |
| Sandy                             | Kassir          |                       |                  |             |                                          |                                                         |                                                                                            |

Supplemental Online Content: Nonauthor Collaborators

\*Indicates required information. Only first name, last name, and suffix will appear in PubMed.

| *First Name and Middle Initial(s) | *Last Name | *Suffix (eg, Jr, III) | Academic Degrees | Institution | Location (city, state/province, country) | Role or Contribution, eg, chair, principal investigator | Group (if more than 1 Group listed in the byline) and/or Subgroup (eg, Steering Committee) |
|-----------------------------------|------------|-----------------------|------------------|-------------|------------------------------------------|---------------------------------------------------------|--------------------------------------------------------------------------------------------|
| Amro                              | Katary     |                       |                  |             |                                          |                                                         |                                                                                            |
| Jaswinder                         | Kaur       |                       |                  |             |                                          |                                                         |                                                                                            |
| Satvinder                         | Kaur       |                       |                  |             |                                          |                                                         |                                                                                            |
| Sherilynn                         | Kavanagh   |                       |                  |             |                                          |                                                         |                                                                                            |
| Abdul                             | Kayani     |                       |                  |             |                                          |                                                         |                                                                                            |
| Callum                            | Kaye       |                       |                  |             |                                          |                                                         |                                                                                            |
| Aayesha                           | Kazi       |                       |                  |             |                                          |                                                         |                                                                                            |
| Sharon                            | Kaznica    |                       |                  |             |                                          |                                                         |                                                                                            |
| Samantha                          | Kearley    |                       |                  |             |                                          |                                                         |                                                                                            |
| Liza                              | Keating    |                       |                  |             |                                          |                                                         |                                                                                            |
| Claire                            | Keatley    |                       |                  |             |                                          |                                                         |                                                                                            |
| Sheryl                            | Keeler     |                       |                  |             |                                          |                                                         |                                                                                            |
| Sherbrina                         | Keen       |                       |                  |             |                                          |                                                         |                                                                                            |
| Alexandra                         | Keen       |                       |                  |             |                                          |                                                         |                                                                                            |
| Katie                             | Keen       |                       |                  |             |                                          |                                                         |                                                                                            |
| Kay                               | Kell       |                       |                  |             |                                          |                                                         |                                                                                            |
| Jeremy                            | Kellington |                       |                  |             |                                          |                                                         |                                                                                            |
| Conor                             | Kelly      |                       |                  |             |                                          |                                                         |                                                                                            |
| Ellen                             | Kelly      |                       |                  |             |                                          |                                                         |                                                                                            |
| Martin                            | Kelly      |                       |                  |             |                                          |                                                         |                                                                                            |
| Zofia                             | Kelly      |                       |                  |             |                                          |                                                         |                                                                                            |
| Olivia                            | Kelsall    |                       |                  |             |                                          |                                                         |                                                                                            |
| Kelly                             | Kemsley    |                       |                  |             |                                          |                                                         |                                                                                            |
| Sara                              | Kendrick   |                       |                  |             |                                          |                                                         |                                                                                            |
| Caroline                          | Kennedy    |                       |                  |             |                                          |                                                         |                                                                                            |
| Kelly                             | Kent       |                       |                  |             |                                          |                                                         |                                                                                            |
| Clement                           | Kerlin     |                       |                  |             |                                          |                                                         |                                                                                            |
| Gord                              | Kerr       |                       |                  |             |                                          |                                                         |                                                                                            |
| Maria                             | Kerr       |                       |                  |             |                                          |                                                         |                                                                                            |
| Samantha                          | Kershaw    |                       |                  |             |                                          |                                                         |                                                                                            |
| Ian                               | Kerslake   |                       |                  |             |                                          |                                                         |                                                                                            |

Supplemental Online Content: Nonauthor Collaborators

\*Indicates required information. Only first name, last name, and suffix will appear in PubMed.

| *First Name and Middle Initial(s) | *Last Name  | *Suffix (eg, Jr, III) | Academic Degrees | Institution | Location (city, state/province, country) | Role or Contribution, eg, chair, principal investigator | Group (if more than 1 Group listed in the byline) and/or Subgroup (eg, Steering Committee) |
|-----------------------------------|-------------|-----------------------|------------------|-------------|------------------------------------------|---------------------------------------------------------|--------------------------------------------------------------------------------------------|
| Margaret                          | Kevern      |                       |                  |             |                                          |                                                         |                                                                                            |
| Imrana                            | Khalid      |                       |                  |             |                                          |                                                         |                                                                                            |
| Camran                            | Khan        |                       |                  |             |                                          |                                                         |                                                                                            |
| Meherunnisa                       | Khan        |                       |                  |             |                                          |                                                         |                                                                                            |
| Mohammed                          | Khan        |                       |                  |             |                                          |                                                         |                                                                                            |
| Sabiya                            | Khan        |                       |                  |             |                                          |                                                         |                                                                                            |
| Meenu                             | Khera       |                       |                  |             |                                          |                                                         |                                                                                            |
| Jayne                             | Khorsandi   |                       |                  |             |                                          |                                                         |                                                                                            |
| Kosar                             | Khwaja      |                       |                  |             |                                          |                                                         |                                                                                            |
| Edy                               | Kim         |                       |                  |             |                                          |                                                         |                                                                                            |
| Youry                             | Kim         |                       |                  |             |                                          |                                                         |                                                                                            |
| Sarah                             | Kimpton     |                       |                  |             |                                          |                                                         |                                                                                            |
| Andrea                            | King        |                       |                  |             |                                          |                                                         |                                                                                            |
| Andrew                            | King        |                       |                  |             |                                          |                                                         |                                                                                            |
| Tony                              | King        |                       |                  |             |                                          |                                                         |                                                                                            |
| Fiona                             | Kinney      |                       |                  |             |                                          |                                                         |                                                                                            |
| Jeff                              | Kinney      |                       |                  |             |                                          |                                                         |                                                                                            |
| Adeline                           | Kintono     |                       |                  |             |                                          |                                                         |                                                                                            |
| Jill                              | Kirk        |                       |                  |             |                                          |                                                         |                                                                                            |
| Daniel                            | Kirkbride   |                       |                  |             |                                          |                                                         |                                                                                            |
| Amy                               | Kirkby      |                       |                  |             |                                          |                                                         |                                                                                            |
| Ian                               | Kirker      |                       |                  |             |                                          |                                                         |                                                                                            |
| Kelly                             | Kislingbury |                       |                  |             |                                          |                                                         |                                                                                            |
| Joseph E                          | Kiss        |                       |                  |             |                                          |                                                         |                                                                                            |
| Georgios                          | Kitsios     |                       |                  |             |                                          |                                                         |                                                                                            |
| Lauren                            | Kittridge   |                       |                  |             |                                          |                                                         |                                                                                            |
| Michelle                          | Knight      |                       |                  |             |                                          |                                                         |                                                                                            |
| Karen                             | Knowles     |                       |                  |             |                                          |                                                         |                                                                                            |
| Karen                             | Knowles     |                       |                  |             |                                          |                                                         |                                                                                            |
| Diana                             | Kobes       |                       |                  |             |                                          |                                                         |                                                                                            |
| Keith                             | Kolsteren   |                       |                  |             |                                          |                                                         |                                                                                            |

Supplemental Online Content: Nonauthor Collaborators

\*Indicates required information. Only first name, last name, and suffix will appear in PubMed.

| *First Name and Middle Initial(s) | *Last Name    | *Suffix (eg, Jr, III) | Academic Degrees | Institution | Location (city, state/province, country) | Role or Contribution, eg, chair, principal investigator | Group (if more than 1 Group listed in the byline) and/or Subgroup (eg, Steering Committee) |
|-----------------------------------|---------------|-----------------------|------------------|-------------|------------------------------------------|---------------------------------------------------------|--------------------------------------------------------------------------------------------|
| Pam                               | Konecny       |                       |                  |             |                                          |                                                         |                                                                                            |
| Jing                              | Kong          |                       |                  |             |                                          |                                                         |                                                                                            |
| Ritchie                           | Koshy         |                       |                  |             |                                          |                                                         |                                                                                            |
| Leonidas                          | Koukouflis    |                       |                  |             |                                          |                                                         |                                                                                            |
| Rebecca                           | Kovacevic     |                       |                  |             |                                          |                                                         |                                                                                            |
| Rhonda                            | Krahn         |                       |                  |             |                                          |                                                         |                                                                                            |
| Vinodh                            | Krishnamurthy |                       |                  |             |                                          |                                                         |                                                                                            |
| Peter                             | Kruger        |                       |                  |             |                                          |                                                         |                                                                                            |
| Rebecca                           | Kruisselbrink |                       |                  |             |                                          |                                                         |                                                                                            |
| Wanda                             | Krywiak       |                       |                  |             |                                          |                                                         |                                                                                            |
| Anand                             | Kumar         |                       |                  |             |                                          |                                                         |                                                                                            |
| Rohit                             | Kumar         |                       |                  |             |                                          |                                                         |                                                                                            |
| Avinash                           | Kumar Jha     |                       |                  |             |                                          |                                                         |                                                                                            |
| Kelly                             | Kuntz         |                       |                  |             |                                          |                                                         |                                                                                            |
| Demetrios                         | Kutsogiannis  |                       |                  |             |                                          |                                                         |                                                                                            |
| Lynsey                            | Kyeremeh      |                       |                  |             |                                          |                                                         |                                                                                            |
| Laura                             | Kyle          |                       |                  |             |                                          |                                                         |                                                                                            |
| Mike                              | Laffan        |                       |                  |             |                                          |                                                         |                                                                                            |
| John                              | Laffey        |                       |                  |             |                                          |                                                         |                                                                                            |
| Jennifer                          | Lafrenier     |                       |                  |             |                                          |                                                         |                                                                                            |
| Shondipon                         | Laha          |                       |                  |             |                                          |                                                         |                                                                                            |
| Manon                             | Lahaie        |                       |                  |             |                                          |                                                         |                                                                                            |
| Barb                              | Laing         |                       |                  |             |                                          |                                                         |                                                                                            |
| Michelle                          | Lake          |                       |                  |             |                                          |                                                         |                                                                                            |
| Carolyn K                         | Lam           |                       |                  |             |                                          |                                                         |                                                                                            |
| Brenda                            | Lamb          |                       |                  |             |                                          |                                                         |                                                                                            |
| Hélène                            | Lamoureux     |                       |                  |             |                                          |                                                         |                                                                                            |
| Rebecca                           | Lanaway       |                       |                  |             |                                          |                                                         |                                                                                            |
| Julia                             | Lancut        |                       |                  |             |                                          |                                                         |                                                                                            |
| Patricia                          | Landy         |                       |                  |             |                                          |                                                         |                                                                                            |
| Eva                               | Lang          |                       |                  |             |                                          |                                                         |                                                                                            |

Supplemental Online Content: Nonauthor Collaborators

\*Indicates required information. Only first name, last name, and suffix will appear in PubMed.

| *First Name and Middle Initial(s) | *Last Name    | *Suffix (eg, Jr, III) | Academic Degrees | Institution | Location (city, state/province, country) | Role or Contribution, eg, chair, principal investigator | Group (if more than 1 Group listed in the byline and/or Subgroup (eg, Steering Committee)) |
|-----------------------------------|---------------|-----------------------|------------------|-------------|------------------------------------------|---------------------------------------------------------|--------------------------------------------------------------------------------------------|
| Liana                             | Lankester     |                       |                  |             |                                          |                                                         |                                                                                            |
| Chantal                           | Larivee       |                       |                  |             |                                          |                                                         |                                                                                            |
| Cheryl                            | Larner        |                       |                  |             |                                          |                                                         |                                                                                            |
| Marilyne                          | Larose        |                       |                  |             |                                          |                                                         |                                                                                            |
| Wojciech                          | Lason         |                       |                  |             |                                          |                                                         |                                                                                            |
| Victoria                          | Latham        |                       |                  |             |                                          |                                                         |                                                                                            |
| Darren                            | Latimer       |                       |                  |             |                                          |                                                         |                                                                                            |
| Annemarie                         | Laumaea       |                       |                  |             |                                          |                                                         |                                                                                            |
| François                          | Lauzier       |                       |                  |             |                                          |                                                         |                                                                                            |
| Colin                             | Lawler        |                       |                  |             |                                          |                                                         |                                                                                            |
| Mark                              | Lawley        |                       |                  |             |                                          |                                                         |                                                                                            |
| Jo                                | Lawrence      |                       |                  |             |                                          |                                                         |                                                                                            |
| Robin                             | Lawrence      |                       |                  |             |                                          |                                                         |                                                                                            |
| Jemima                            | Lawson        |                       |                  |             |                                          |                                                         |                                                                                            |
| Rebecca                           | Lawton        |                       |                  |             |                                          |                                                         |                                                                                            |
| Juan Martin                       | Lazaro        |                       |                  |             |                                          |                                                         |                                                                                            |
| David                             | Leaf          |                       |                  |             |                                          |                                                         |                                                                                            |
| Richard                           | Lean          |                       |                  |             |                                          |                                                         |                                                                                            |
| Christina                         | Leaver        |                       |                  |             |                                          |                                                         |                                                                                            |
| Susannah                          | Leaver        |                       |                  |             |                                          |                                                         |                                                                                            |
| Julie                             | Leblond       |                       |                  |             |                                          |                                                         |                                                                                            |
| Maryse                            | Leclerc       |                       |                  |             |                                          |                                                         |                                                                                            |
| June                              | Lee           |                       |                  |             |                                          |                                                         |                                                                                            |
| Lai Ha                            | Lee           |                       |                  |             |                                          |                                                         |                                                                                            |
| Marylee                           | Lee           |                       |                  |             |                                          |                                                         |                                                                                            |
| Stephanie                         | Lee           |                       |                  |             |                                          |                                                         |                                                                                            |
| Stephen                           | Lee           |                       |                  |             |                                          |                                                         |                                                                                            |
| Wendy                             | Lee           |                       |                  |             |                                          |                                                         |                                                                                            |
| Wanda                             | Lefresne      |                       |                  |             |                                          |                                                         |                                                                                            |
| Danielle                          | Leguard-White |                       |                  |             |                                          |                                                         |                                                                                            |
| Paula                             | Lehto         |                       |                  |             |                                          |                                                         |                                                                                            |

Supplemental Online Content: Nonauthor Collaborators

\*Indicates required information. Only first name, last name, and suffix will appear in PubMed.

| *First Name and Middle Initial(s) | *Last Name    | *Suffix (eg, Jr, III) | Academic Degrees | Institution | Location (city, state/province, country) | Role or Contribution, eg, chair, principal investigator | Group (if more than 1 Group listed in the byline) and/or Subgroup (eg, Steering Committee) |
|-----------------------------------|---------------|-----------------------|------------------|-------------|------------------------------------------|---------------------------------------------------------|--------------------------------------------------------------------------------------------|
| Francois                          | Lellouche     |                       |                  |             |                                          |                                                         |                                                                                            |
| Irina                             | Lenchuk       |                       |                  |             |                                          |                                                         |                                                                                            |
| Luc                               | Lesage        |                       |                  |             |                                          |                                                         |                                                                                            |
| Ullrich                           | Leuschner     |                       |                  |             |                                          |                                                         |                                                                                            |
| Chris                             | Levett        |                       |                  |             |                                          |                                                         |                                                                                            |
| Antoine                           | Lewin         |                       |                  |             |                                          |                                                         |                                                                                            |
| Michaela                          | Lewin         |                       |                  |             |                                          |                                                         |                                                                                            |
| Joanne                            | Lewis         |                       |                  |             |                                          |                                                         |                                                                                            |
| Lisa                              | Lewis         |                       |                  |             |                                          |                                                         |                                                                                            |
| Sarah                             | Lewis         |                       |                  |             |                                          |                                                         |                                                                                            |
| Lorraine                          | Lewis-Prosser |                       |                  |             |                                          |                                                         |                                                                                            |
| Anna                              | Li            |                       |                  |             |                                          |                                                         |                                                                                            |
| Jenny                             | Li            |                       |                  |             |                                          |                                                         |                                                                                            |
| Angela                            | Liao          |                       |                  |             |                                          |                                                         |                                                                                            |
| Kim                               | Licanio       |                       |                  |             |                                          |                                                         |                                                                                            |
| Sophia                            | Lieber        |                       |                  |             |                                          |                                                         |                                                                                            |
| James                             | Lin           |                       |                  |             |                                          |                                                         |                                                                                            |
| Gabriella                         | Lindergard    |                       |                  |             |                                          |                                                         |                                                                                            |
| Vanessa                           | Linnett       |                       |                  |             |                                          |                                                         |                                                                                            |
| Charlotte                         | Little        |                       |                  |             |                                          |                                                         |                                                                                            |
| Theresa                           | Liu           |                       |                  |             |                                          |                                                         |                                                                                            |
| Alexandra                         | Liversidge    |                       |                  |             |                                          |                                                         |                                                                                            |
| Patricia                          | Lizotte       |                       |                  |             |                                          |                                                         |                                                                                            |
| Cristina                          | Lobato        |                       |                  |             |                                          |                                                         |                                                                                            |
| Maria                             | Lobo-Clarke   |                       |                  |             |                                          |                                                         |                                                                                            |
| Stephen                           | Lock          |                       |                  |             |                                          |                                                         |                                                                                            |
| Teresa                            | Lockett       |                       |                  |             |                                          |                                                         |                                                                                            |
| Sandy                             | Lockyer       |                       |                  |             |                                          |                                                         |                                                                                            |
| Tracey                            | Lofting       |                       |                  |             |                                          |                                                         |                                                                                            |
| Meg                               | Logan         |                       |                  |             |                                          |                                                         |                                                                                            |
| Kaatje                            | Lomme         |                       |                  |             |                                          |                                                         |                                                                                            |



Supplemental Online Content: Nonauthor Collaborators

\*Indicates required information. Only first name, last name, and suffix will appear in PubMed.

| *First Name and Middle Initial(s) | *Last Name     | *Suffix (eg, Jr, III) | Academic Degrees | Institution | Location (city, state/province, country) | Role or Contribution, eg, chair, principal investigator | Group (if more than 1 Group listed in the byline) and/or Subgroup (eg, Steering Committee) |
|-----------------------------------|----------------|-----------------------|------------------|-------------|------------------------------------------|---------------------------------------------------------|--------------------------------------------------------------------------------------------|
| Matilda                           | Long           |                       |                  |             |                                          |                                                         |                                                                                            |
| Maria                             | Lopez Martinez |                       |                  |             |                                          |                                                         |                                                                                            |
| Alyssa                            | Lopus          |                       |                  |             |                                          |                                                         |                                                                                            |
| Stuart                            | Lord           |                       |                  |             |                                          |                                                         |                                                                                            |
| Laura                             | Lordache       |                       |                  |             |                                          |                                                         |                                                                                            |
| Kieron                            | Loregnard      |                       |                  |             |                                          |                                                         |                                                                                            |
| Catherine                         | Lorenzon       |                       |                  |             |                                          |                                                         |                                                                                            |
| Sylvain                           | Lother         |                       |                  |             |                                          |                                                         |                                                                                            |
| Eva                               | Loutraris      |                       |                  |             |                                          |                                                         |                                                                                            |
| Huw                               | Lovett         |                       |                  |             |                                          |                                                         |                                                                                            |
| Daniel                            | Loveys         |                       |                  |             |                                          |                                                         |                                                                                            |
| Benjamin                          | Lowe           |                       |                  |             |                                          |                                                         |                                                                                            |
| Caroline                          | Lowe           |                       |                  |             |                                          |                                                         |                                                                                            |
| Maryalyce                         | Lowery         |                       |                  |             |                                          |                                                         |                                                                                            |
| Emma                              | Loxley         |                       |                  |             |                                          |                                                         |                                                                                            |
| Rachael                           | Lucas          |                       |                  |             |                                          |                                                         |                                                                                            |
| Kayla                             | Lucier         |                       |                  |             |                                          |                                                         |                                                                                            |
| Tracy                             | Luk            |                       |                  |             |                                          |                                                         |                                                                                            |
| Brenda                            | Lukasik        |                       |                  |             |                                          |                                                         |                                                                                            |
| Hayley                            | Lund           |                       |                  |             |                                          |                                                         |                                                                                            |
| Kathleen                          | Lundy          |                       |                  |             |                                          |                                                         |                                                                                            |
| Ji                                | Luo            |                       |                  |             |                                          |                                                         |                                                                                            |
| Julia                             | Lussier        |                       |                  |             |                                          |                                                         |                                                                                            |
| Heather                           | Luyckx         |                       |                  |             |                                          |                                                         |                                                                                            |
| Chan-Hoa                          | Ly             |                       |                  |             |                                          |                                                         |                                                                                            |
| Elisa                             | Ly             |                       |                  |             |                                          |                                                         |                                                                                            |
| Sarah                             | Lymn           |                       |                  |             |                                          |                                                         |                                                                                            |
| Ceri                              | Lynch          |                       |                  |             |                                          |                                                         |                                                                                            |
| Daniella                          | Lynch          |                       |                  |             |                                          |                                                         |                                                                                            |
| Bruce                             | Lyon           |                       |                  |             |                                          |                                                         |                                                                                            |
| Emily                             | Lyons          |                       |                  |             |                                          |                                                         |                                                                                            |

Supplemental Online Content: Nonauthor Collaborators

\*Indicates required information. Only first name, last name, and suffix will appear in PubMed.

| *First Name and Middle Initial(s) | *Last Name | *Suffix (eg, Jr, III) | Academic Degrees | Institution | Location (city, state/province, country) | Role or Contribution, eg, chair, principal investigator | Group (if more than 1 Group listed in the byline) and/or Subgroup (eg, Steering Committee) |
|-----------------------------------|------------|-----------------------|------------------|-------------|------------------------------------------|---------------------------------------------------------|--------------------------------------------------------------------------------------------|
| Angela                            | Macauley   |                       |                  |             |                                          |                                                         |                                                                                            |
| Kevin                             | MacDonald  |                       |                  |             |                                          |                                                         |                                                                                            |
| Peter                             | MacDonald  |                       |                  |             |                                          |                                                         |                                                                                            |
| Stuart                            | MacDonald  |                       |                  |             |                                          |                                                         |                                                                                            |
| Tania                             | MacDonald  |                       |                  |             |                                          |                                                         |                                                                                            |
| Cara                              | MacGuigan  |                       |                  |             |                                          |                                                         |                                                                                            |
| Lynn                              | MacKay     |                       |                  |             |                                          |                                                         |                                                                                            |
| Colleen                           | MacKenzie  |                       |                  |             |                                          |                                                         |                                                                                            |
| Debbie                            | MacKenzie  |                       |                  |             |                                          |                                                         |                                                                                            |
| Patricia                          | Mackey     |                       |                  |             |                                          |                                                         |                                                                                            |
| Sheila                            | MacLennan  |                       |                  |             |                                          |                                                         |                                                                                            |
| Sharon                            | MacLeod    |                       |                  |             |                                          |                                                         |                                                                                            |
| Patty                             | MacNally   |                       |                  |             |                                          |                                                         |                                                                                            |
| Nancy                             | MacNeil    |                       |                  |             |                                          |                                                         |                                                                                            |
| Karen                             | Madgwick   |                       |                  |             |                                          |                                                         |                                                                                            |
| Harriet                           | Madiyiko   |                       |                  |             |                                          |                                                         |                                                                                            |
| Tim                               | Maggs      |                       |                  |             |                                          |                                                         |                                                                                            |
| Kathryn                           | Maguire    |                       |                  |             |                                          |                                                         |                                                                                            |
| Teena                             | Maguire    |                       |                  |             |                                          |                                                         |                                                                                            |
| Sarah                             | Magwood    |                       |                  |             |                                          |                                                         |                                                                                            |
| Amitaa                            | Maharajh   |                       |                  |             |                                          |                                                         |                                                                                            |
| Jonathan                          | Mailman    |                       |                  |             |                                          |                                                         |                                                                                            |
| Carole                            | Main       |                       |                  |             |                                          |                                                         |                                                                                            |
| Esther                            | Makanju    |                       |                  |             |                                          |                                                         |                                                                                            |
| Ahmed                             | Makky      |                       |                  |             |                                          |                                                         |                                                                                            |
| Arystarch                         | Makowski   |                       |                  |             |                                          |                                                         |                                                                                            |
| Salim                             | Malakouti  |                       |                  |             |                                          |                                                         |                                                                                            |
| Michelle                          | Male       |                       |                  |             |                                          |                                                         |                                                                                            |
| Brian                             | Malley     |                       |                  |             |                                          |                                                         |                                                                                            |
| Carolyn                           | Maloney    |                       |                  |             |                                          |                                                         |                                                                                            |
| Gracie                            | Maloney    |                       |                  |             |                                          |                                                         |                                                                                            |

Supplemental Online Content: Nonauthor Collaborators

\*Indicates required information. Only first name, last name, and suffix will appear in PubMed.

| *First Name and Middle Initial(s) | *Last Name        | *Suffix (eg, Jr, III) | Academic Degrees | Institution | Location (city, state/province, country) | Role or Contribution, eg, chair, principal investigator | Group (if more than 1 Group listed in the byline) and/or Subgroup (eg, Steering Committee) |
|-----------------------------------|-------------------|-----------------------|------------------|-------------|------------------------------------------|---------------------------------------------------------|--------------------------------------------------------------------------------------------|
| Victoria                          | Manax             |                       |                  |             |                                          |                                                         |                                                                                            |
| Yara                              | Mangindaan        |                       |                  |             |                                          |                                                         |                                                                                            |
| Kathy                             | Manguiat          |                       |                  |             |                                          |                                                         |                                                                                            |
| Lynne                             | Mannion           |                       |                  |             |                                          |                                                         |                                                                                            |
| Venika                            | Manoharan         |                       |                  |             |                                          |                                                         |                                                                                            |
| Elmer                             | Manuel            |                       |                  |             |                                          |                                                         |                                                                                            |
| Garikayi                          | Marange           |                       |                  |             |                                          |                                                         |                                                                                            |
| Lisa                              | March             |                       |                  |             |                                          |                                                         |                                                                                            |
| Guy                               | Marcotte          |                       |                  |             |                                          |                                                         |                                                                                            |
| Helen                             | Maria-Osborn      |                       |                  |             |                                          |                                                         |                                                                                            |
| Nathalie                          | Marin             |                       |                  |             |                                          |                                                         |                                                                                            |
| Dimitra                           | Marinakis         |                       |                  |             |                                          |                                                         |                                                                                            |
| Nicole                            | Marinoff          |                       |                  |             |                                          |                                                         |                                                                                            |
| Rene                              | Markgraff         |                       |                  |             |                                          |                                                         |                                                                                            |
| Marina                            | Marotti           |                       |                  |             |                                          |                                                         |                                                                                            |
| Sara                              | Marrero Hernandez |                       |                  |             |                                          |                                                         |                                                                                            |
| Cheryl                            | Marriot           |                       |                  |             |                                          |                                                         |                                                                                            |
| Yvonne                            | Marriott          |                       |                  |             |                                          |                                                         |                                                                                            |
| Oscar                             | Marroquin         |                       |                  |             |                                          |                                                         |                                                                                            |
| Brian D.                          | Marsden           |                       |                  |             |                                          |                                                         |                                                                                            |
| Tracy                             | Marsden           |                       |                  |             |                                          |                                                         |                                                                                            |
| Emma                              | Marsh             |                       |                  |             |                                          |                                                         |                                                                                            |
| James                             | Marshall          |                       |                  |             |                                          |                                                         |                                                                                            |
| Samantha                          | Marston           |                       |                  |             |                                          |                                                         |                                                                                            |
| Nicole                            | Marten            |                       |                  |             |                                          |                                                         |                                                                                            |
| Elise                             | Martin            |                       |                  |             |                                          |                                                         |                                                                                            |
| Emma                              | Martin            |                       |                  |             |                                          |                                                         |                                                                                            |
| Jane                              | Martin            |                       |                  |             |                                          |                                                         |                                                                                            |
| Laila                             | Martin            |                       |                  |             |                                          |                                                         |                                                                                            |
| Timothy                           | Martin            |                       |                  |             |                                          |                                                         |                                                                                            |
| Alexander                         | Martinez          |                       |                  |             |                                          |                                                         |                                                                                            |

Supplemental Online Content: Nonauthor Collaborators

\*Indicates required information. Only first name, last name, and suffix will appear in PubMed.

| *First Name and Middle Initial(s) | *Last Name       | *Suffix (eg, Jr, III) | Academic Degrees | Institution | Location (city, state/province, country) | Role or Contribution, eg, chair, principal investigator | Group (if more than 1 Group listed in the byline and/or Subgroup (eg, Steering Committee)) |
|-----------------------------------|------------------|-----------------------|------------------|-------------|------------------------------------------|---------------------------------------------------------|--------------------------------------------------------------------------------------------|
| Maria                             | Martins          |                       |                  |             |                                          |                                                         |                                                                                            |
| Olivia                            | Martins          |                       |                  |             |                                          |                                                         |                                                                                            |
| Lucas                             | Martins Ferreira |                       |                  |             |                                          |                                                         |                                                                                            |
| Roman                             | Mary-Genetu      |                       |                  |             |                                          |                                                         |                                                                                            |
| Lynn                              | Mason            |                       |                  |             |                                          |                                                         |                                                                                            |
| Brent                             | Massar           |                       |                  |             |                                          |                                                         |                                                                                            |
| Caroline                          | Masse            |                       |                  |             |                                          |                                                         |                                                                                            |
| Marie-Helene                      | Masse            |                       |                  |             |                                          |                                                         |                                                                                            |
| Natalie                           | Massey           |                       |                  |             |                                          |                                                         |                                                                                            |
| Michail                           | Mataliotakis,    |                       |                  |             |                                          |                                                         |                                                                                            |
| Caroline                          | Mathews          |                       |                  |             |                                          |                                                         |                                                                                            |
| Marion                            | Mathie           |                       |                  |             |                                          |                                                         |                                                                                            |
| Wadzanai                          | Matimba-Mupaya   |                       |                  |             |                                          |                                                         |                                                                                            |
| Ramprasad                         | Matsa            |                       |                  |             |                                          |                                                         |                                                                                            |
| Julie                             | Matthews         |                       |                  |             |                                          |                                                         |                                                                                            |
| Phillipa                          | Matthews         |                       |                  |             |                                          |                                                         |                                                                                            |
| Sue                               | Matthews         |                       |                  |             |                                          |                                                         |                                                                                            |
| Gwynn                             | Matthias         |                       |                  |             |                                          |                                                         |                                                                                            |
| Gemma                             | Maxwell          |                       |                  |             |                                          |                                                         |                                                                                            |
| Oliver                            | May              |                       |                  |             |                                          |                                                         |                                                                                            |
| Katelyn                           | Mayak            |                       |                  |             |                                          |                                                         |                                                                                            |
| Irving                            | Mayangao         |                       |                  |             |                                          |                                                         |                                                                                            |
| Lee                               | Maynard          |                       |                  |             |                                          |                                                         |                                                                                            |
| Florian                           | Mayr             |                       |                  |             |                                          |                                                         |                                                                                            |
| John                              | Mazerall         |                       |                  |             |                                          |                                                         |                                                                                            |
| Mercy                             | Mbwembwe         |                       |                  |             |                                          |                                                         |                                                                                            |
| Clare                             | Mc Goldrick      |                       |                  |             |                                          |                                                         |                                                                                            |
| Moyra                             | Mc Master        |                       |                  |             |                                          |                                                         |                                                                                            |
| Helinor                           | Mcaleese         |                       |                  |             |                                          |                                                         |                                                                                            |
| Sam                               | McAllery         |                       |                  |             |                                          |                                                         |                                                                                            |

Supplemental Online Content: Nonauthor Collaborators

\*Indicates required information. Only first name, last name, and suffix will appear in PubMed.

| *First Name and Middle Initial(s) | *Last Name | *Suffix (eg, Jr, III) | Academic Degrees | Institution | Location (city, state/province, country) | Role or Contribution, eg, chair, principal investigator | Group (if more than 1 Group listed in the byline) and/or Subgroup (eg, Steering Committee) |
|-----------------------------------|------------|-----------------------|------------------|-------------|------------------------------------------|---------------------------------------------------------|--------------------------------------------------------------------------------------------|
| Julie                             | McAuley    |                       |                  |             |                                          |                                                         |                                                                                            |
| Edmund                            | McCallion  |                       |                  |             |                                          |                                                         |                                                                                            |
| Martina                           | McCalmont  |                       |                  |             |                                          |                                                         |                                                                                            |
| Joanna                            | McCarthy   |                       |                  |             |                                          |                                                         |                                                                                            |
| Declan                            | McClintock |                       |                  |             |                                          |                                                         |                                                                                            |
| Charlene                          | McCracken  |                       |                  |             |                                          |                                                         |                                                                                            |
| Phoebe                            | McCracken  |                       |                  |             |                                          |                                                         |                                                                                            |
| Erin                              | McCreary   |                       |                  |             |                                          |                                                         |                                                                                            |
| Louise                            | McCreery   |                       |                  |             |                                          |                                                         |                                                                                            |
| Iain J                            | McCullagh  |                       |                  |             |                                          |                                                         |                                                                                            |
| Corrienne                         | McCulloch  |                       |                  |             |                                          |                                                         |                                                                                            |
| June                              | McDonald   |                       |                  |             |                                          |                                                         |                                                                                            |
| Rebecca                           | McEldrew   |                       |                  |             |                                          |                                                         |                                                                                            |
| Forbes                            | McGain     |                       |                  |             |                                          |                                                         |                                                                                            |
| Karen                             | McGarry    |                       |                  |             |                                          |                                                         |                                                                                            |
| Margaret                          | McGarvey   |                       |                  |             |                                          |                                                         |                                                                                            |
| Mel                               | McGee      |                       |                  |             |                                          |                                                         |                                                                                            |
| Christopher                       | McGhee     |                       |                  |             |                                          |                                                         |                                                                                            |
| Hannah                            | McGivern   |                       |                  |             |                                          |                                                         |                                                                                            |
| Deborah                           | McGlynn    |                       |                  |             |                                          |                                                         |                                                                                            |
| Peter                             | McGuigan   |                       |                  |             |                                          |                                                         |                                                                                            |
| Lauralyn                          | McIntyre   |                       |                  |             |                                          |                                                         |                                                                                            |
| Madeleine                         | McKee      |                       |                  |             |                                          |                                                         |                                                                                            |
| Shirley                           | McKenna    |                       |                  |             |                                          |                                                         |                                                                                            |
| Sonia                             | McKenna    |                       |                  |             |                                          |                                                         |                                                                                            |
| Denise                            | Mckeown    |                       |                  |             |                                          |                                                         |                                                                                            |
| Claire                            | Mckie      |                       |                  |             |                                          |                                                         |                                                                                            |
| Sheila                            | McKilop    |                       |                  |             |                                          |                                                         |                                                                                            |
| Lorna                             | McLintock  |                       |                  |             |                                          |                                                         |                                                                                            |
| Deborah K.                        | McMahon    |                       |                  |             |                                          |                                                         |                                                                                            |
| Joanne                            | McMahon    |                       |                  |             |                                          |                                                         |                                                                                            |

Supplemental Online Content: Nonauthor Collaborators

\*Indicates required information. Only first name, last name, and suffix will appear in PubMed.

| *First Name and Middle Initial(s) | *Last Name  | *Suffix (eg, Jr, III) | Academic Degrees | Institution | Location (city, state/province, country) | Role or Contribution, eg, chair, principal investigator | Group (if more than 1 Group listed in the byline) and/or Subgroup (eg, Steering Committee) |
|-----------------------------------|-------------|-----------------------|------------------|-------------|------------------------------------------|---------------------------------------------------------|--------------------------------------------------------------------------------------------|
| Janet                             | McManus     |                       |                  |             |                                          |                                                         |                                                                                            |
| Alexandra                         | McMillan    |                       |                  |             |                                          |                                                         |                                                                                            |
| Catherine                         | McMillan    |                       |                  |             |                                          |                                                         |                                                                                            |
| Helen                             | McMillan    |                       |                  |             |                                          |                                                         |                                                                                            |
| Liam                              | McMorrow    |                       |                  |             |                                          |                                                         |                                                                                            |
| Joanne                            | McMurdo     |                       |                  |             |                                          |                                                         |                                                                                            |
| Darren                            | McNamara    |                       |                  |             |                                          |                                                         |                                                                                            |
| Robert                            | McNamara    |                       |                  |             |                                          |                                                         |                                                                                            |
| Deborah                           | McNaughton  |                       |                  |             |                                          |                                                         |                                                                                            |
| Mary P                            | McNicholl   |                       |                  |             |                                          |                                                         |                                                                                            |
| Sam                               | McWilliam   |                       |                  |             |                                          |                                                         |                                                                                            |
| Suzanna                           | Medic       |                       |                  |             |                                          |                                                         |                                                                                            |
| Halima                            | Medjahed    |                       |                  |             |                                          |                                                         |                                                                                            |
| Rebecca                           | Medva       |                       |                  |             |                                          |                                                         |                                                                                            |
| Jenny                             | Mehew       |                       |                  |             |                                          |                                                         |                                                                                            |
| Reena                             | Mehta       |                       |                  |             |                                          |                                                         |                                                                                            |
| Jana                              | Meier       |                       |                  |             |                                          |                                                         |                                                                                            |
| Stephanie                         | Mellin      |                       |                  |             |                                          |                                                         |                                                                                            |
| Phil                              | Mellor      |                       |                  |             |                                          |                                                         |                                                                                            |
| Laurent-Paul                      | Ménard      |                       |                  |             |                                          |                                                         |                                                                                            |
| Emelissa                          | Mendoza     |                       |                  |             |                                          |                                                         |                                                                                            |
| Megan                             | Meredith    |                       |                  |             |                                          |                                                         |                                                                                            |
| Stella                            | Metherell   |                       |                  |             |                                          |                                                         |                                                                                            |
| Greg                              | Methven     |                       |                  |             |                                          |                                                         |                                                                                            |
| Louise                            | Mew         |                       |                  |             |                                          |                                                         |                                                                                            |
| Jason                             | Meyer       |                       |                  |             |                                          |                                                         |                                                                                            |
| Nhlanhla                          | Mguni       |                       |                  |             |                                          |                                                         |                                                                                            |
| Angiy                             | Michael     |                       |                  |             |                                          |                                                         |                                                                                            |
| Vince                             | Michael     |                       |                  |             |                                          |                                                         |                                                                                            |
| Natalia                           | Michalak    |                       |                  |             |                                          |                                                         |                                                                                            |
| Sue                               | Michalowicz |                       |                  |             |                                          |                                                         |                                                                                            |

Supplemental Online Content: Nonauthor Collaborators

\*Indicates required information. Only first name, last name, and suffix will appear in PubMed.

| *First Name and Middle Initial(s) | *Last Name   | *Suffix (eg, Jr, III) | Academic Degrees | Institution | Location (city, state/province, country) | Role or Contribution, eg, chair, principal investigator | Group (if more than 1 Group listed in the byline) and/or Subgroup (eg, Steering Committee) |
|-----------------------------------|--------------|-----------------------|------------------|-------------|------------------------------------------|---------------------------------------------------------|--------------------------------------------------------------------------------------------|
| Claire                            | Michelson    |                       |                  |             |                                          |                                                         |                                                                                            |
| Saskia                            | Middlethorp  |                       |                  |             |                                          |                                                         |                                                                                            |
| Margaret                          | Miedema      |                       |                  |             |                                          |                                                         |                                                                                            |
| Sydney                            | Miezitis     |                       |                  |             |                                          |                                                         |                                                                                            |
| Justyna                           | Mikusek      |                       |                  |             |                                          |                                                         |                                                                                            |
| Ian                               | Millar       |                       |                  |             |                                          |                                                         |                                                                                            |
| Tina                              | Millen       |                       |                  |             |                                          |                                                         |                                                                                            |
| Jennene                           | Miller       |                       |                  |             |                                          |                                                         |                                                                                            |
| Lorna                             | Miller       |                       |                  |             |                                          |                                                         |                                                                                            |
| Melanie                           | Milloy       |                       |                  |             |                                          |                                                         |                                                                                            |
| Gary H                            | Mills        |                       |                  |             |                                          |                                                         |                                                                                            |
| Steve                             | Mills        |                       |                  |             |                                          |                                                         |                                                                                            |
| Rebecca                           | Miln         |                       |                  |             |                                          |                                                         |                                                                                            |
| Christine                         | Milot        |                       |                  |             |                                          |                                                         |                                                                                            |
| Adriana                           | Minella      |                       |                  |             |                                          |                                                         |                                                                                            |
| Sara                              | Mingo Garcia |                       |                  |             |                                          |                                                         |                                                                                            |
| Arron                             | Minhas       |                       |                  |             |                                          |                                                         |                                                                                            |
| Tami                              | Minnier      |                       |                  |             |                                          |                                                         |                                                                                            |
| Anne                              | Minogue      |                       |                  |             |                                          |                                                         |                                                                                            |
| Liliana                           | Miranda      |                       |                  |             |                                          |                                                         |                                                                                            |
| Deena                             | Mistry       |                       |                  |             |                                          |                                                         |                                                                                            |
| Reena                             | Mistry       |                       |                  |             |                                          |                                                         |                                                                                            |
| Beata                             | Misztal      |                       |                  |             |                                          |                                                         |                                                                                            |
| Sarah                             | Mitchard     |                       |                  |             |                                          |                                                         |                                                                                            |
| Susan                             | Mitchell     |                       |                  |             |                                          |                                                         |                                                                                            |
| Gloria                            | Mmadubuko    |                       |                  |             |                                          |                                                         |                                                                                            |
| Dimpy                             | Modi         |                       |                  |             |                                          |                                                         |                                                                                            |
| Kaveh                             | Moghbeli     |                       |                  |             |                                          |                                                         |                                                                                            |
| Mahalakshmi                       | Mohan        |                       |                  |             |                                          |                                                         |                                                                                            |
| Rachel                            | Moir         |                       |                  |             |                                          |                                                         |                                                                                            |
| April                             | Molloy       |                       |                  |             |                                          |                                                         |                                                                                            |

Supplemental Online Content: Nonauthor Collaborators

\*Indicates required information. Only first name, last name, and suffix will appear in PubMed.

| *First Name and Middle Initial(s) | *Last Name    | *Suffix (eg, Jr, III) | Academic Degrees | Institution | Location (city, state/province, country) | Role or Contribution, eg, chair, principal investigator | Group (if more than 1 Group listed in the byline) and/or Subgroup (eg, Steering Committee) |
|-----------------------------------|---------------|-----------------------|------------------|-------------|------------------------------------------|---------------------------------------------------------|--------------------------------------------------------------------------------------------|
| Liz                               | Molson        |                       |                  |             |                                          |                                                         |                                                                                            |
| Holly                             | Monaghan      |                       |                  |             |                                          |                                                         |                                                                                            |
| Josephine                         | Monaghan      |                       |                  |             |                                          |                                                         |                                                                                            |
| Ian                               | Moody         |                       |                  |             |                                          |                                                         |                                                                                            |
| Carly                             | Moore         |                       |                  |             |                                          |                                                         |                                                                                            |
| Gillian                           | Moore         |                       |                  |             |                                          |                                                         |                                                                                            |
| Hannah                            | Moore         |                       |                  |             |                                          |                                                         |                                                                                            |
| Lynne                             | Moore         |                       |                  |             |                                          |                                                         |                                                                                            |
| Tracy                             | Moore         |                       |                  |             |                                          |                                                         |                                                                                            |
| Vanessa                           | Moore         |                       |                  |             |                                          |                                                         |                                                                                            |
| Louise                            | Moorhouse     |                       |                  |             |                                          |                                                         |                                                                                            |
| MaryAnne                          | Moreau        |                       |                  |             |                                          |                                                         |                                                                                            |
| Nicola                            | Moreland      |                       |                  |             |                                          |                                                         |                                                                                            |
| Jeronimo                          | Moreno Cuesta |                       |                  |             |                                          |                                                         |                                                                                            |
| Adam                              | Morgan        |                       |                  |             |                                          |                                                         |                                                                                            |
| Jackie                            | Morgan        |                       |                  |             |                                          |                                                         |                                                                                            |
| Karen                             | Morgan        |                       |                  |             |                                          |                                                         |                                                                                            |
| Matt                              | Morgan        |                       |                  |             |                                          |                                                         |                                                                                            |
| Rebecca                           | Morgan        |                       |                  |             |                                          |                                                         |                                                                                            |
| Susan                             | Morpeth       |                       |                  |             |                                          |                                                         |                                                                                            |
| Helen                             | Morris        |                       |                  |             |                                          |                                                         |                                                                                            |
| Sheila                            | Morris        |                       |                  |             |                                          |                                                         |                                                                                            |
| Steve                             | Morrisey      |                       |                  |             |                                          |                                                         |                                                                                            |
| Suzy                              | Morton        |                       |                  |             |                                          |                                                         |                                                                                            |
| Rosna                             | Mortuza       |                       |                  |             |                                          |                                                         |                                                                                            |
| Ivan                              | Mounitsyn     |                       |                  |             |                                          |                                                         |                                                                                            |
| Lorraine                          | Mounsey       |                       |                  |             |                                          |                                                         |                                                                                            |
| Debbie                            | Moyst         |                       |                  |             |                                          |                                                         |                                                                                            |
| Shelia                            | Mtuwa         |                       |                  |             |                                          |                                                         |                                                                                            |
| Darlene                           | Mueller       |                       |                  |             |                                          |                                                         |                                                                                            |
| Alison                            | Muir          |                       |                  |             |                                          |                                                         |                                                                                            |



Supplemental Online Content: Nonauthor Collaborators

\*Indicates required information. Only first name, last name, and suffix will appear in PubMed.

| *First Name and Middle Initial(s) | *Last Name         | *Suffix (eg, Jr, III) | Academic Degrees | Institution | Location (city, state/province, country) | Role or Contribution, eg, chair, principal investigator | Group (if more than 1 Group listed in the byline) and/or Subgroup (eg, Steering Committee) |
|-----------------------------------|--------------------|-----------------------|------------------|-------------|------------------------------------------|---------------------------------------------------------|--------------------------------------------------------------------------------------------|
| Martin                            | Muir               |                       |                  |             |                                          |                                                         |                                                                                            |
| Dipak                             | Mukherjee          |                       |                  |             |                                          |                                                         |                                                                                            |
| Tshinupay                         | Mukwa              |                       |                  |             |                                          |                                                         |                                                                                            |
| John                              | Mulder             |                       |                  |             |                                          |                                                         |                                                                                            |
| Suleman                           | Mulla              |                       |                  |             |                                          |                                                         |                                                                                            |
| Barbara                           | Mullin             |                       |                  |             |                                          |                                                         |                                                                                            |
| Joanne                            | Mullings           |                       |                  |             |                                          |                                                         |                                                                                            |
| Mike                              | Muldowney          |                       |                  |             |                                          |                                                         |                                                                                            |
| Sarah                             | Mumford            |                       |                  |             |                                          |                                                         |                                                                                            |
| Sheila                            | Munt               |                       |                  |             |                                          |                                                         |                                                                                            |
| Nafissah                          | Munu               |                       |                  |             |                                          |                                                         |                                                                                            |
| Diane                             | Murdoch            |                       |                  |             |                                          |                                                         |                                                                                            |
| Andrea                            | Murphy             |                       |                  |             |                                          |                                                         |                                                                                            |
| Emily                             | Murphy             |                       |                  |             |                                          |                                                         |                                                                                            |
| Fidelma                           | Murphy             |                       |                  |             |                                          |                                                         |                                                                                            |
| Jo                                | Murphy             |                       |                  |             |                                          |                                                         |                                                                                            |
| Peter                             | Murphy             |                       |                  |             |                                          |                                                         |                                                                                            |
| Sheenagh                          | Murphy             |                       |                  |             |                                          |                                                         |                                                                                            |
| Lauren                            | Murray             |                       |                  |             |                                          |                                                         |                                                                                            |
| Srinivas                          | Murthy             |                       |                  |             |                                          |                                                         |                                                                                            |
| Kaiser                            | Mushtaq            |                       |                  |             |                                          |                                                         |                                                                                            |
| Edvin                             | Music              |                       |                  |             |                                          |                                                         |                                                                                            |
| Natasha                           | Muzengi            |                       |                  |             |                                          |                                                         |                                                                                            |
| Esther                            | Mwaura             |                       |                  |             |                                          |                                                         |                                                                                            |
| Judith                            | Nabess             |                       |                  |             |                                          |                                                         |                                                                                            |
| Anas                              | Naeem              |                       |                  |             |                                          |                                                         |                                                                                            |
| Parminder                         | Naga               |                       |                  |             |                                          |                                                         |                                                                                            |
| Priya                             | Nair               |                       |                  |             |                                          |                                                         |                                                                                            |
| Reena                             | Nair Khade         |                       |                  |             |                                          |                                                         |                                                                                            |
| Rose                              | Nalumansi Sekiwala |                       |                  |             |                                          |                                                         |                                                                                            |
| Aarti                             | Nandani            |                       |                  |             |                                          |                                                         |                                                                                            |

Supplemental Online Content: Nonauthor Collaborators

\*Indicates required information. Only first name, last name, and suffix will appear in PubMed.

| *First Name and Middle Initial(s) | *Last Name | *Suffix (eg, Jr, III) | Academic Degrees | Institution | Location (city, state/province, country) | Role or Contribution, eg, chair, principal investigator | Group (if more than 1 Group listed in the byline) and/or Subgroup (eg, Steering Committee) |
|-----------------------------------|------------|-----------------------|------------------|-------------|------------------------------------------|---------------------------------------------------------|--------------------------------------------------------------------------------------------|
| Shruthi                           | Narayan    |                       |                  |             |                                          |                                                         |                                                                                            |
| Anushka                           | Natajaran  |                       |                  |             |                                          |                                                         |                                                                                            |
| Vineet                            | Nayyar     |                       |                  |             |                                          |                                                         |                                                                                            |
| Mobeena                           | Naz        |                       |                  |             |                                          |                                                         |                                                                                            |
| Salima                            | Nazarali   |                       |                  |             |                                          |                                                         |                                                                                            |
| Matthew                           | Neal       |                       |                  |             |                                          |                                                         |                                                                                            |
| Mihai                             | Netea      |                       |                  |             |                                          |                                                         |                                                                                            |
| Kimberley                         | Netherton  |                       |                  |             |                                          |                                                         |                                                                                            |
| Gina                              | Neves      |                       |                  |             |                                          |                                                         |                                                                                            |
| Claire-Michelle                   | Neville    |                       |                  |             |                                          |                                                         |                                                                                            |
| Josephine                         | Newanji    |                       |                  |             |                                          |                                                         |                                                                                            |
| Julie                             | Newman     |                       |                  |             |                                          |                                                         |                                                                                            |
| Richard                           | Newman     |                       |                  |             |                                          |                                                         |                                                                                            |
| Sally                             | Newman     |                       |                  |             |                                          |                                                         |                                                                                            |
| Tabitha                           | Newman     |                       |                  |             |                                          |                                                         |                                                                                            |
| Claire                            | Newsam     |                       |                  |             |                                          |                                                         |                                                                                            |
| Christopher                       | Ng         |                       |                  |             |                                          |                                                         |                                                                                            |
| Dung                              | Nguyen     |                       |                  |             |                                          |                                                         |                                                                                            |
| Anne                              | Nicholson  |                       |                  |             |                                          |                                                         |                                                                                            |
| Genelle                           | Nicholson  |                       |                  |             |                                          |                                                         |                                                                                            |
| Janet                             | Nicholson  |                       |                  |             |                                          |                                                         |                                                                                            |
| Sukhi                             | Nijjar     |                       |                  |             |                                          |                                                         |                                                                                            |
| Nikitas                           | Nikitas    |                       |                  |             |                                          |                                                         |                                                                                            |
| Josephine                         | Nnadi      |                       |                  |             |                                          |                                                         |                                                                                            |
| Harriet                           | Noble      |                       |                  |             |                                          |                                                         |                                                                                            |
| Josee                             | Noel       |                       |                  |             |                                          |                                                         |                                                                                            |
| Jerry                             | Nolan      |                       |                  |             |                                          |                                                         |                                                                                            |
| Marie-Ève                         | Nolin      |                       |                  |             |                                          |                                                         |                                                                                            |
| Joelle                            | Nordstrom  |                       |                  |             |                                          |                                                         |                                                                                            |
| Jamie                             | Norgrave   |                       |                  |             |                                          |                                                         |                                                                                            |
| Julie                             | North      |                       |                  |             |                                          |                                                         |                                                                                            |

Supplemental Online Content: Nonauthor Collaborators

\*Indicates required information. Only first name, last name, and suffix will appear in PubMed.

| *First Name and Middle Initial(s) | *Last Name  | *Suffix (eg, Jr, III) | Academic Degrees | Institution | Location (city, state/province, country) | Role or Contribution, eg, chair, principal investigator | Group (if more than 1 Group listed in the byline) and/or Subgroup (eg, Steering Committee) |
|-----------------------------------|-------------|-----------------------|------------------|-------------|------------------------------------------|---------------------------------------------------------|--------------------------------------------------------------------------------------------|
| Julie                             | Northcote   |                       |                  |             |                                          |                                                         |                                                                                            |
| Jurgens                           | Nortje      |                       |                  |             |                                          |                                                         |                                                                                            |
| Angie                             | Nown        |                       |                  |             |                                          |                                                         |                                                                                            |
| Tony                              | Noyce       |                       |                  |             |                                          |                                                         |                                                                                            |
| Alan                              | Noyon       |                       |                  |             |                                          |                                                         |                                                                                            |
| Gloria                            | Nwajei Agha |                       |                  |             |                                          |                                                         |                                                                                            |
| Kelly                             | Nwankiti    |                       |                  |             |                                          |                                                         |                                                                                            |
| Eugenia                           | Nweje       |                       |                  |             |                                          |                                                         |                                                                                            |
| Maria                             | Nygren,     |                       |                  |             |                                          |                                                         |                                                                                            |
| Aibhilin                          | O'Connor    |                       |                  |             |                                          |                                                         |                                                                                            |
| Anne                              | O'Connor    |                       |                  |             |                                          |                                                         |                                                                                            |
| Stephanie                         | O'Connor    |                       |                  |             |                                          |                                                         |                                                                                            |
| Kaitlyn                           | O'Halloran  |                       |                  |             |                                          |                                                         |                                                                                            |
| Sinéad                            | O'Kane      |                       |                  |             |                                          |                                                         |                                                                                            |
| Ryan                              | O'Leary     |                       |                  |             |                                          |                                                         |                                                                                            |
| Aisling                           | O'Neill     |                       |                  |             |                                          |                                                         |                                                                                            |
| Kevin                             | O'Reilly    |                       |                  |             |                                          |                                                         |                                                                                            |
| Susan                             | Oakley      |                       |                  |             |                                          |                                                         |                                                                                            |
| Aneta                             | Oborska     |                       |                  |             |                                          |                                                         |                                                                                            |
| Andrew                            | O'Brien     |                       |                  |             |                                          |                                                         |                                                                                            |
| Sarah                             | O'Brien     |                       |                  |             |                                          |                                                         |                                                                                            |
| Maria                             | O'Connell   |                       |                  |             |                                          |                                                         |                                                                                            |
| Martin                            | O'Connell   |                       |                  |             |                                          |                                                         |                                                                                            |
| Tansey                            | O'Connor    |                       |                  |             |                                          |                                                         |                                                                                            |
| Simon                             | Oczkowski   |                       |                  |             |                                          |                                                         |                                                                                            |
| Rosie                             | O'Dea       |                       |                  |             |                                          |                                                         |                                                                                            |
| Ruth                              | O'Donnell   |                       |                  |             |                                          |                                                         |                                                                                            |
| Violet                            | O'Donnell   |                       |                  |             |                                          |                                                         |                                                                                            |
| Dapo                              | Odumeru     |                       |                  |             |                                          |                                                         |                                                                                            |
| Bethan                            | Ogg         |                       |                  |             |                                          |                                                         |                                                                                            |
| Kayode                            | Ogunbenro   |                       |                  |             |                                          |                                                         |                                                                                            |

Supplemental Online Content: Nonauthor Collaborators

\*Indicates required information. Only first name, last name, and suffix will appear in PubMed.

| *First Name and Middle Initial(s) | *Last Name            | *Suffix (eg, Jr, III) | Academic Degrees | Institution | Location (city, state/province, country) | Role or Contribution, eg, chair, principal investigator | Group (if more than 1 Group listed in the byline and/or Subgroup (eg, Steering Committee)) |
|-----------------------------------|-----------------------|-----------------------|------------------|-------------|------------------------------------------|---------------------------------------------------------|--------------------------------------------------------------------------------------------|
| Cecilia                           | O'Kane                |                       |                  |             |                                          |                                                         |                                                                                            |
| Eleanor                           | O'Kell                |                       |                  |             |                                          |                                                         |                                                                                            |
| Clementina                        | Okundaye              |                       |                  |             |                                          |                                                         |                                                                                            |
| Ché                               | Okyne-Turkson         |                       |                  |             |                                          |                                                         |                                                                                            |
| Jane                              | Oldham                |                       |                  |             |                                          |                                                         |                                                                                            |
| Marta                             | Oliveira              |                       |                  |             |                                          |                                                         |                                                                                            |
| Anne                              | Oliver                |                       |                  |             |                                          |                                                         |                                                                                            |
| Nimca                             | Omer                  |                       |                  |             |                                          |                                                         |                                                                                            |
| Lynne                             | Oncea                 |                       |                  |             |                                          |                                                         |                                                                                            |
| Bronagh                           | O'Neill               |                       |                  |             |                                          |                                                         |                                                                                            |
| Rajalakshmi                       | Orath Prabakaran      |                       |                  |             |                                          |                                                         |                                                                                            |
| Chloe                             | Orchard               |                       |                  |             |                                          |                                                         |                                                                                            |
| Joanna                            | O'Reilly              |                       |                  |             |                                          |                                                         |                                                                                            |
| Neil                              | Orford                |                       |                  |             |                                          |                                                         |                                                                                            |
| Laura                             | Oritz-Ruiz de Gordoia |                       |                  |             |                                          |                                                         |                                                                                            |
| Dave                              | Ormrod                |                       |                  |             |                                          |                                                         |                                                                                            |
| Katrina                           | Orr                   |                       |                  |             |                                          |                                                         |                                                                                            |
| Lisa                              | Orr                   |                       |                  |             |                                          |                                                         |                                                                                            |
| Rawlings                          | Osagie                |                       |                  |             |                                          |                                                         |                                                                                            |
| Alexander                         | Osborne               |                       |                  |             |                                          |                                                         |                                                                                            |
| Darlene                           | Osborne               |                       |                  |             |                                          |                                                         |                                                                                            |
| Roxanne                           | Osmond                |                       |                  |             |                                          |                                                         |                                                                                            |
| Alberto                           | Ospina Stella         |                       |                  |             |                                          |                                                         |                                                                                            |
| Kheng Ly                          | Oueng                 |                       |                  |             |                                          |                                                         |                                                                                            |
| Natalie                           | Outten                |                       |                  |             |                                          |                                                         |                                                                                            |
| Deepali                           | Oza                   |                       |                  |             |                                          |                                                         |                                                                                            |
| Upulee                            | Pabasara              |                       |                  |             |                                          |                                                         |                                                                                            |
| Tanya                             | Paddock               |                       |                  |             |                                          |                                                         |                                                                                            |
| Jennifer                          | Pade                  |                       |                  |             |                                          |                                                         |                                                                                            |
| Nickolas                          | Page                  |                       |                  |             |                                          |                                                         |                                                                                            |
| Valerie J                         | Page                  |                       |                  |             |                                          |                                                         |                                                                                            |

Supplemental Online Content: Nonauthor Collaborators

\*Indicates required information. Only first name, last name, and suffix will appear in PubMed.

| *First Name and Middle Initial(s) | *Last Name     | *Suffix (eg, Jr, III) | Academic Degrees | Institution | Location (city, state/province, country) | Role or Contribution, eg, chair, principal investigator | Group (if more than 1 Group listed in the byline) and/or Subgroup (eg, Steering Committee) |
|-----------------------------------|----------------|-----------------------|------------------|-------------|------------------------------------------|---------------------------------------------------------|--------------------------------------------------------------------------------------------|
| Mari-Liis                         | Pakats         |                       |                  |             |                                          |                                                         |                                                                                            |
| Shehan                            | Palihavadana   |                       |                  |             |                                          |                                                         |                                                                                            |
| Kimberley                         | Palmer         |                       |                  |             |                                          |                                                         |                                                                                            |
| Chantale                          | Pambrun        |                       |                  |             |                                          |                                                         |                                                                                            |
| Rob                               | Pankhurst      |                       |                  |             |                                          |                                                         |                                                                                            |
| Asad                              | Pantanwala     |                       |                  |             |                                          |                                                         |                                                                                            |
| Evita                             | Pappa          |                       |                  |             |                                          |                                                         |                                                                                            |
| Marina                            | Pappa          |                       |                  |             |                                          |                                                         |                                                                                            |
| Mélisande                         | Paquet         |                       |                  |             |                                          |                                                         |                                                                                            |
| Elankumaran                       | Paramasivam    |                       |                  |             |                                          |                                                         |                                                                                            |
| Ana                               | Parejasanchez  |                       |                  |             |                                          |                                                         |                                                                                            |
| Dhruv                             | Parekh         |                       |                  |             |                                          |                                                         |                                                                                            |
| Caroline                          | Parent         |                       |                  |             |                                          |                                                         |                                                                                            |
| Éric                              | Parent         |                       |                  |             |                                          |                                                         |                                                                                            |
| Vicky                             | Parent         |                       |                  |             |                                          |                                                         |                                                                                            |
| Liz                               | Park           |                       |                  |             |                                          |                                                         |                                                                                            |
| Carmel                            | Parker         |                       |                  |             |                                          |                                                         |                                                                                            |
| Lisa                              | Parkinson      |                       |                  |             |                                          |                                                         |                                                                                            |
| Mamta                             | Parmar         |                       |                  |             |                                          |                                                         |                                                                                            |
| Karen                             | Parry-Billings |                       |                  |             |                                          |                                                         |                                                                                            |
| Kerry                             | Parsons        |                       |                  |             |                                          |                                                         |                                                                                            |
| Sarah                             | Parsons        |                       |                  |             |                                          |                                                         |                                                                                            |
| Kirsten                           | Pass           |                       |                  |             |                                          |                                                         |                                                                                            |
| Sarah                             | Patch          |                       |                  |             |                                          |                                                         |                                                                                            |
| Amit                              | Patel          |                       |                  |             |                                          |                                                         |                                                                                            |
| Bijal                             | Patel          |                       |                  |             |                                          |                                                         |                                                                                            |
| Kamal                             | Patel          |                       |                  |             |                                          |                                                         |                                                                                            |
| Mithal                            | Patel          |                       |                  |             |                                          |                                                         |                                                                                            |
| Priti                             | Patel          |                       |                  |             |                                          |                                                         |                                                                                            |
| Rebecca                           | Patel          |                       |                  |             |                                          |                                                         |                                                                                            |
| Ann                               | Patterson      |                       |                  |             |                                          |                                                         |                                                                                            |

Supplemental Online Content: Nonauthor Collaborators

\*Indicates required information. Only first name, last name, and suffix will appear in PubMed.

| *First Name and Middle Initial(s) | *Last Name         | *Suffix (eg, Jr, III) | Academic Degrees | Institution | Location (city, state/province, country) | Role or Contribution, eg, chair, principal investigator | Group (if more than 1 Group listed in the byline) and/or Subgroup (eg, Steering Committee) |
|-----------------------------------|--------------------|-----------------------|------------------|-------------|------------------------------------------|---------------------------------------------------------|--------------------------------------------------------------------------------------------|
| Lisa                              | Patterson          |                       |                  |             |                                          |                                                         |                                                                                            |
| Pauline                           | Patterson          |                       |                  |             |                                          |                                                         |                                                                                            |
| Trena                             | Patzer             |                       |                  |             |                                          |                                                         |                                                                                            |
| Daniel                            | Paul               |                       |                  |             |                                          |                                                         |                                                                                            |
| Janice                            | Paul               |                       |                  |             |                                          |                                                         |                                                                                            |
| Roshni                            | Paul               |                       |                  |             |                                          |                                                         |                                                                                            |
| Bojan                             | Paunovic           |                       |                  |             |                                          |                                                         |                                                                                            |
| Debra                             | Pavelich           |                       |                  |             |                                          |                                                         |                                                                                            |
| David                             | Payne              |                       |                  |             |                                          |                                                         |                                                                                            |
| Abby                              | Peacock            |                       |                  |             |                                          |                                                         |                                                                                            |
| Sandra                            | Peake              |                       |                  |             |                                          |                                                         |                                                                                            |
| Harriet                           | Pearson            |                       |                  |             |                                          |                                                         |                                                                                            |
| Karen                             | Pearson            |                       |                  |             |                                          |                                                         |                                                                                            |
| Karen                             | Pearson            |                       |                  |             |                                          |                                                         |                                                                                            |
| Suzannah                          | Pegler             |                       |                  |             |                                          |                                                         |                                                                                            |
| Belinda                           | Pelle              |                       |                  |             |                                          |                                                         |                                                                                            |
| Abigail                           | Pemberton          |                       |                  |             |                                          |                                                         |                                                                                            |
| Jessica                           | Pendlebury         |                       |                  |             |                                          |                                                         |                                                                                            |
| Sarah                             | Pendlebury         |                       |                  |             |                                          |                                                         |                                                                                            |
| Alistair                          | Penny              |                       |                  |             |                                          |                                                         |                                                                                            |
| Romina                            | Pepermans Saluzzio |                       |                  |             |                                          |                                                         |                                                                                            |
| Ana                               | Pereira            |                       |                  |             |                                          |                                                         |                                                                                            |
| Rita                              | Pereira            |                       |                  |             |                                          |                                                         |                                                                                            |
| Parmi                             | Perera             |                       |                  |             |                                          |                                                         |                                                                                            |
| Jane                              | Perez              |                       |                  |             |                                          |                                                         |                                                                                            |
| Rachel                            | Perkins            |                       |                  |             |                                          |                                                         |                                                                                            |
| Josée                             | Perreault          |                       |                  |             |                                          |                                                         |                                                                                            |
| Reno                              | Perri              |                       |                  |             |                                          |                                                         |                                                                                            |
| Terrie                            | Perry              |                       |                  |             |                                          |                                                         |                                                                                            |
| Craig                             | Peters             |                       |                  |             |                                          |                                                         |                                                                                            |
| Jayne                             | Peters             |                       |                  |             |                                          |                                                         |                                                                                            |

Supplemental Online Content: Nonauthor Collaborators

\*Indicates required information. Only first name, last name, and suffix will appear in PubMed.

| *First Name and Middle Initial(s) | *Last Name | *Suffix (eg, Jr, III) | Academic Degrees | Institution | Location (city, state/province, country) | Role or Contribution, eg, chair, principal investigator | Group (if more than 1 Group listed in the byline and/or Subgroup (eg, Steering Committee)) |
|-----------------------------------|------------|-----------------------|------------------|-------------|------------------------------------------|---------------------------------------------------------|--------------------------------------------------------------------------------------------|
| Sam                               | Peters     |                       |                  |             |                                          |                                                         |                                                                                            |
| Svenja                            | Peters     |                       |                  |             |                                          |                                                         |                                                                                            |
| Shelley                           | Peterson   |                       |                  |             |                                          |                                                         |                                                                                            |
| Tanya                             | Petraszko  |                       |                  |             |                                          |                                                         |                                                                                            |
| Tasha                             | Pettigrew  |                       |                  |             |                                          |                                                         |                                                                                            |
| Ville                             | Pettilä    |                       |                  |             |                                          |                                                         |                                                                                            |
| Sharon                            | Peyton     |                       |                  |             |                                          |                                                         |                                                                                            |
| Gunjan                            | Phalod     |                       |                  |             |                                          |                                                         |                                                                                            |
| Jennifer E                        | Philbin    |                       |                  |             |                                          |                                                         |                                                                                            |
| Neil                              | Phillips   |                       |                  |             |                                          |                                                         |                                                                                            |
| Barbara                           | Phillips   |                       |                  |             |                                          |                                                         |                                                                                            |
| Danielle                          | Phillips   |                       |                  |             |                                          |                                                         |                                                                                            |
| Karen                             | Phillips   |                       |                  |             |                                          |                                                         |                                                                                            |
| Margaret                          | Phillips   |                       |                  |             |                                          |                                                         |                                                                                            |
| Pat                               | Phillips   |                       |                  |             |                                          |                                                         |                                                                                            |
| Clark                             | Phillipson |                       |                  |             |                                          |                                                         |                                                                                            |
| Katherine                         | Philpott   |                       |                  |             |                                          |                                                         |                                                                                            |
| Mandeep-Kaur                      | Phull      |                       |                  |             |                                          |                                                         |                                                                                            |
| Charlotte                         | Pickering  |                       |                  |             |                                          |                                                         |                                                                                            |
| Hayleah                           | Pickford   |                       |                  |             |                                          |                                                         |                                                                                            |
| Charlie                           | Piercy     |                       |                  |             |                                          |                                                         |                                                                                            |
| Janet                             | Piersma    |                       |                  |             |                                          |                                                         |                                                                                            |
| Claudia Mireille                  | Pigeon     |                       |                  |             |                                          |                                                         |                                                                                            |
| Suresh                            | Pillai     |                       |                  |             |                                          |                                                         |                                                                                            |
| Nikki                             | Pilutti    |                       |                  |             |                                          |                                                         |                                                                                            |
| Julia                             | Pinder     |                       |                  |             |                                          |                                                         |                                                                                            |
| Joanne                            | Pink       |                       |                  |             |                                          |                                                         |                                                                                            |
| Jez                               | Pinnell    |                       |                  |             |                                          |                                                         |                                                                                            |
| Mary                              | Pitcher    |                       |                  |             |                                          |                                                         |                                                                                            |
| Sally                             | Pitts      |                       |                  |             |                                          |                                                         |                                                                                            |
| Mathias                           | Pletz      |                       |                  |             |                                          |                                                         |                                                                                            |

Supplemental Online Content: Nonauthor Collaborators

\*Indicates required information. Only first name, last name, and suffix will appear in PubMed.

| *First Name and Middle Initial(s) | *Last Name    | *Suffix (eg, Jr, III) | Academic Degrees | Institution | Location (city, state/province, country) | Role or Contribution, eg, chair, principal investigator | Group (if more than 1 Group listed in the byline) and/or Subgroup (eg, Steering Committee) |
|-----------------------------------|---------------|-----------------------|------------------|-------------|------------------------------------------|---------------------------------------------------------|--------------------------------------------------------------------------------------------|
| Rutger                            | Ploeg         |                       |                  |             |                                          |                                                         |                                                                                            |
| Tatiana                           | Pogreban      |                       |                  |             |                                          |                                                         |                                                                                            |
| David                             | Pogson        |                       |                  |             |                                          |                                                         |                                                                                            |
| David                             | Poles         |                       |                  |             |                                          |                                                         |                                                                                            |
| Petra                             | Polgarova     |                       |                  |             |                                          |                                                         |                                                                                            |
| Barb                              | Pollock       |                       |                  |             |                                          |                                                         |                                                                                            |
| Michelle                          | Polson        |                       |                  |             |                                          |                                                         |                                                                                            |
| Fiona                             | Pomeroy       |                       |                  |             |                                          |                                                         |                                                                                            |
| Jagtar-Singh                      | Pooni         |                       |                  |             |                                          |                                                         |                                                                                            |
| Iulia                             | Popescu       |                       |                  |             |                                          |                                                         |                                                                                            |
| Ella                              | Poppitt       |                       |                  |             |                                          |                                                         |                                                                                            |
| Christopher                       | Porada        |                       |                  |             |                                          |                                                         |                                                                                            |
| Rebecca                           | Porteous      |                       |                  |             |                                          |                                                         |                                                                                            |
| David                             | Porter        |                       |                  |             |                                          |                                                         |                                                                                            |
| Alison                            | Potter        |                       |                  |             |                                          |                                                         |                                                                                            |
| Kenzi                             | Potter        |                       |                  |             |                                          |                                                         |                                                                                            |
| Pedro                             | Povoa         |                       |                  |             |                                          |                                                         |                                                                                            |
| Carolyn                           | Powel         |                       |                  |             |                                          |                                                         |                                                                                            |
| Elizabeth                         | Powell        |                       |                  |             |                                          |                                                         |                                                                                            |
| Geneen                            | Powell        |                       |                  |             |                                          |                                                         |                                                                                            |
| Gillian                           | Powter        |                       |                  |             |                                          |                                                         |                                                                                            |
| Rashida                           | Pramanik      |                       |                  |             |                                          |                                                         |                                                                                            |
| Maanvi                            | Prasad        |                       |                  |             |                                          |                                                         |                                                                                            |
| Sindhuja                          | Pratheepkumar |                       |                  |             |                                          |                                                         |                                                                                            |
| Ashton                            | Prefontaine   |                       |                  |             |                                          |                                                         |                                                                                            |
| Jeffrey                           | Presneill     |                       |                  |             |                                          |                                                         |                                                                                            |
| J r mie                           | Pr vost       |                       |                  |             |                                          |                                                         |                                                                                            |
| Allison                           | Prihoda       |                       |                  |             |                                          |                                                         |                                                                                            |
| Janet                             | Pring         |                       |                  |             |                                          |                                                         |                                                                                            |
| Lisa                              | Privatera     |                       |                  |             |                                          |                                                         |                                                                                            |
| Linda                             | Prokopiuk     |                       |                  |             |                                          |                                                         |                                                                                            |



Supplemental Online Content: Nonauthor Collaborators

\*Indicates required information. Only first name, last name, and suffix will appear in PubMed.

| *First Name and Middle Initial(s) | *Last Name     | *Suffix (eg, Jr, III) | Academic Degrees | Institution | Location (city, state/province, country) | Role or Contribution, eg, chair, principal investigator | Group (if more than 1 Group listed in the byline and/or Subgroup (eg, Steering Committee)) |
|-----------------------------------|----------------|-----------------------|------------------|-------------|------------------------------------------|---------------------------------------------------------|--------------------------------------------------------------------------------------------|
| Tracey                            | Pronyk-Ward    |                       |                  |             |                                          |                                                         |                                                                                            |
| Nicola                            | Proudfoot      |                       |                  |             |                                          |                                                         |                                                                                            |
| Rachel                            | Prout          |                       |                  |             |                                          |                                                         |                                                                                            |
| Richard                           | Pugh           |                       |                  |             |                                          |                                                         |                                                                                            |
| Laura                             | Purandare      |                       |                  |             |                                          |                                                         |                                                                                            |
| Claire                            | Purcell        |                       |                  |             |                                          |                                                         |                                                                                            |
| Dharam                            | Purohit        |                       |                  |             |                                          |                                                         |                                                                                            |
| Sarah                             | Purvis         |                       |                  |             |                                          |                                                         |                                                                                            |
| Daniel                            | Putensen       |                       |                  |             |                                          |                                                         |                                                                                            |
| Zudin                             | Puthucheary    |                       |                  |             |                                          |                                                         |                                                                                            |
| Kathryn                           | Puxty          |                       |                  |             |                                          |                                                         |                                                                                            |
| Xinyi                             | Qiu            |                       |                  |             |                                          |                                                         |                                                                                            |
| Rachael                           | Quayle         |                       |                  |             |                                          |                                                         |                                                                                            |
| Mailene                           | Quinagon       |                       |                  |             |                                          |                                                         |                                                                                            |
| Alison                            | Quinn          |                       |                  |             |                                          |                                                         |                                                                                            |
| Kevin                             | Quinn          |                       |                  |             |                                          |                                                         |                                                                                            |
| Miguel                            | Quinones-Mateu |                       |                  |             |                                          |                                                         |                                                                                            |
| Amy                               | Quirk          |                       |                  |             |                                          |                                                         |                                                                                            |
| Hafiz                             | Qureshi        |                       |                  |             |                                          |                                                         |                                                                                            |
| Wayne                             | Rabin          |                       |                  |             |                                          |                                                         |                                                                                            |
| Isabelle                          | Rabuseau       |                       |                  |             |                                          |                                                         |                                                                                            |
| Emma                              | Rademaker      |                       |                  |             |                                          |                                                         |                                                                                            |
| Sharon                            | Rainey         |                       |                  |             |                                          |                                                         |                                                                                            |
| Ajay                              | Raithatha      |                       |                  |             |                                          |                                                         |                                                                                            |
| David                             | Ralphs         |                       |                  |             |                                          |                                                         |                                                                                            |
| Mohamed                           | Ramali         |                       |                  |             |                                          |                                                         |                                                                                            |
| Angelo                            | Ramos          |                       |                  |             |                                          |                                                         |                                                                                            |
| Lidia                             | Ramos          |                       |                  |             |                                          |                                                         |                                                                                            |
| Helen                             | Randall        |                       |                  |             |                                          |                                                         |                                                                                            |
| Sandra                            | Randall        |                       |                  |             |                                          |                                                         |                                                                                            |
| Georgina                          | Randell        |                       |                  |             |                                          |                                                         |                                                                                            |

Supplemental Online Content: Nonauthor Collaborators

\*Indicates required information. Only first name, last name, and suffix will appear in PubMed.

| *First Name and Middle Initial(s) | *Last Name   | *Suffix (eg, Jr, III) | Academic Degrees | Institution | Location (city, state/province, country) | Role or Contribution, eg, chair, principal investigator | Group (if more than 1 Group listed in the byline) and/or Subgroup (eg, Steering Committee) |
|-----------------------------------|--------------|-----------------------|------------------|-------------|------------------------------------------|---------------------------------------------------------|--------------------------------------------------------------------------------------------|
| Ramina                            | Randhawa     |                       |                  |             |                                          |                                                         |                                                                                            |
| Haley                             | Ranton       |                       |                  |             |                                          |                                                         |                                                                                            |
| Deepak                            | Rao          |                       |                  |             |                                          |                                                         |                                                                                            |
| Ravishankar                       | Rao Baikady  |                       |                  |             |                                          |                                                         |                                                                                            |
| Alia                              | Rashid       |                       |                  |             |                                          |                                                         |                                                                                            |
| Connie                            | Rasko        |                       |                  |             |                                          |                                                         |                                                                                            |
| Jeremy                            | Ratcliff     |                       |                  |             |                                          |                                                         |                                                                                            |
| Valli                             | Ratnam       |                       |                  |             |                                          |                                                         |                                                                                            |
| Rashmi                            | Rauniyar     |                       |                  |             |                                          |                                                         |                                                                                            |
| Sam                               | Rawlins      |                       |                  |             |                                          |                                                         |                                                                                            |
| Michelle                          | Ray          |                       |                  |             |                                          |                                                         |                                                                                            |
| Kik                               | Raymakers    |                       |                  |             |                                          |                                                         |                                                                                            |
| Benjamin                          | Rayner       |                       |                  |             |                                          |                                                         |                                                                                            |
| Michael                           | Reay         |                       |                  |             |                                          |                                                         |                                                                                            |
| Rashmi                            | Rebello      |                       |                  |             |                                          |                                                         |                                                                                            |
| Amie                              | Reddy        |                       |                  |             |                                          |                                                         |                                                                                            |
| Harsha                            | Reddy,       |                       |                  |             |                                          |                                                         |                                                                                            |
| Catherine                         | Reed         |                       |                  |             |                                          |                                                         |                                                                                            |
| Grace                             | Rees         |                       |                  |             |                                          |                                                         |                                                                                            |
| Ian                               | Rees         |                       |                  |             |                                          |                                                         |                                                                                            |
| Brenda                            | Reeve        |                       |                  |             |                                          |                                                         |                                                                                            |
| Fiona                             | Regan        |                       |                  |             |                                          |                                                         |                                                                                            |
| Andrew                            | Reid         |                       |                  |             |                                          |                                                         |                                                                                            |
| Robert                            | Reilly       |                       |                  |             |                                          |                                                         |                                                                                            |
| Shonagh                           | Reilly       |                       |                  |             |                                          |                                                         |                                                                                            |
| Henrik                            | Reschreiter, |                       |                  |             |                                          |                                                         |                                                                                            |
| Lorna                             | Retzlaff     |                       |                  |             |                                          |                                                         |                                                                                            |
| Adam                              | Revill       |                       |                  |             |                                          |                                                         |                                                                                            |
| Oleksa                            | Rewa         |                       |                  |             |                                          |                                                         |                                                                                            |
| Bob                               | Reynolds     |                       |                  |             |                                          |                                                         |                                                                                            |
| Claire                            | Reynolds     |                       |                  |             |                                          |                                                         |                                                                                            |

Supplemental Online Content: Nonauthor Collaborators

\*Indicates required information. Only first name, last name, and suffix will appear in PubMed.

| *First Name and Middle Initial(s) | *Last Name     | *Suffix (eg, Jr, III) | Academic Degrees | Institution | Location (city, state/province, country) | Role or Contribution, eg, chair, principal investigator | Group (if more than 1 Group listed in the byline) and/or Subgroup (eg, Steering Committee) |
|-----------------------------------|----------------|-----------------------|------------------|-------------|------------------------------------------|---------------------------------------------------------|--------------------------------------------------------------------------------------------|
| John                              | Reynolds       |                       |                  |             |                                          |                                                         |                                                                                            |
| Kamila                            | Reznicek       |                       |                  |             |                                          |                                                         |                                                                                            |
| Jonathan                          | Rhodes         |                       |                  |             |                                          |                                                         |                                                                                            |
| Emily                             | Rich           |                       |                  |             |                                          |                                                         |                                                                                            |
| Jonathan                          | Richard        |                       |                  |             |                                          |                                                         |                                                                                            |
| Debbie                            | Richards       |                       |                  |             |                                          |                                                         |                                                                                            |
| Suzanne                           | Richards       |                       |                  |             |                                          |                                                         |                                                                                            |
| Alvin                             | Richards-Belle |                       |                  |             |                                          |                                                         |                                                                                            |
| Carol                             | Richardson     |                       |                  |             |                                          |                                                         |                                                                                            |
| Eric                              | Richardson     |                       |                  |             |                                          |                                                         |                                                                                            |
| Joanne                            | Riches         |                       |                  |             |                                          |                                                         |                                                                                            |
| Daniel                            | Ricketts       |                       |                  |             |                                          |                                                         |                                                                                            |
| Jonathan                          | Ricks          |                       |                  |             |                                          |                                                         |                                                                                            |
| Ilse                              | Rietveld       |                       |                  |             |                                          |                                                         |                                                                                            |
| Stephen                           | Rigby          |                       |                  |             |                                          |                                                         |                                                                                            |
| Linda                             | Rikkert        |                       |                  |             |                                          |                                                         |                                                                                            |
| Dominic                           | Rimmer         |                       |                  |             |                                          |                                                         |                                                                                            |
| Clive                             | Risbridger     |                       |                  |             |                                          |                                                         |                                                                                            |
| Michelle                          | Ritchot        |                       |                  |             |                                          |                                                         |                                                                                            |
| Jenny                             | Ritzema        |                       |                  |             |                                          |                                                         |                                                                                            |
| Pascale                           | Riverin        |                       |                  |             |                                          |                                                         |                                                                                            |
| Marlene                           | Roach          |                       |                  |             |                                          |                                                         |                                                                                            |
| Matthew                           | Robb           |                       |                  |             |                                          |                                                         |                                                                                            |
| Émilie                            | Roberge        |                       |                  |             |                                          |                                                         |                                                                                            |
| Eilir                             | Roberts        |                       |                  |             |                                          |                                                         |                                                                                            |
| Leanne                            | Roberts        |                       |                  |             |                                          |                                                         |                                                                                            |
| Tracey                            | Roberts        |                       |                  |             |                                          |                                                         |                                                                                            |
| Debra                             | Robertson      |                       |                  |             |                                          |                                                         |                                                                                            |
| Doug                              | Robertson      |                       |                  |             |                                          |                                                         |                                                                                            |
| Alyssia                           | Robinson       |                       |                  |             |                                          |                                                         |                                                                                            |
| Katie                             | Robinson       |                       |                  |             |                                          |                                                         |                                                                                            |

Supplemental Online Content: Nonauthor Collaborators

\*Indicates required information. Only first name, last name, and suffix will appear in PubMed.

| *First Name and Middle Initial(s) | *Last Name  | *Suffix (eg, Jr, III) | Academic Degrees | Institution | Location (city, state/province, country) | Role or Contribution, eg, chair, principal investigator | Group (if more than 1 Group listed in the byline) and/or Subgroup (eg, Steering Committee) |
|-----------------------------------|-------------|-----------------------|------------------|-------------|------------------------------------------|---------------------------------------------------------|--------------------------------------------------------------------------------------------|
| Matt                              | Robinson    |                       |                  |             |                                          |                                                         |                                                                                            |
| Stacey                            | Robinson    |                       |                  |             |                                          |                                                         |                                                                                            |
| Cherie                            | Robson      |                       |                  |             |                                          |                                                         |                                                                                            |
| Lisa                              | Roche       |                       |                  |             |                                          |                                                         |                                                                                            |
| Margaret                          | Roche       |                       |                  |             |                                          |                                                         |                                                                                            |
| Bram                              | Rochweg     |                       |                  |             |                                          |                                                         |                                                                                            |
| Jennifer                          | Rock        |                       |                  |             |                                          |                                                         |                                                                                            |
| Natalie                           | Rodden      |                       |                  |             |                                          |                                                         |                                                                                            |
| Cassidy                           | Rodley      |                       |                  |             |                                          |                                                         |                                                                                            |
| Andrea                            | Rogers      |                       |                  |             |                                          |                                                         |                                                                                            |
| Gernot                            | Rohde       |                       |                  |             |                                          |                                                         |                                                                                            |
| Roceld                            | Rojo        |                       |                  |             |                                          |                                                         |                                                                                            |
| Tina                              | Romagnuolo  |                       |                  |             |                                          |                                                         |                                                                                            |
| Atal                              | Roman       |                       |                  |             |                                          |                                                         |                                                                                            |
| Clare                             | Rook        |                       |                  |             |                                          |                                                         |                                                                                            |
| Kevin                             | Rooney      |                       |                  |             |                                          |                                                         |                                                                                            |
| Mercedes                          | Rosario     |                       |                  |             |                                          |                                                         |                                                                                            |
| Lace Paulyn                       | Rosaroso    |                       |                  |             |                                          |                                                         |                                                                                            |
| Brian                             | Rosborough  |                       |                  |             |                                          |                                                         |                                                                                            |
| David                             | Rose        |                       |                  |             |                                          |                                                         |                                                                                            |
| Rachel                            | Rose        |                       |                  |             |                                          |                                                         |                                                                                            |
| Steve                             | Rose        |                       |                  |             |                                          |                                                         |                                                                                            |
| Vikkie                            | Rose        |                       |                  |             |                                          |                                                         |                                                                                            |
| Joanne                            | Ross        |                       |                  |             |                                          |                                                         |                                                                                            |
| Natalie                           | Ross        |                       |                  |             |                                          |                                                         |                                                                                            |
| Anthony                           | Rostron     |                       |                  |             |                                          |                                                         |                                                                                            |
| Jason                             | Roth        |                       |                  |             |                                          |                                                         |                                                                                            |
| Pascal                            | Rouleau     |                       |                  |             |                                          |                                                         |                                                                                            |
| Charles                           | Rounds      |                       |                  |             |                                          |                                                         |                                                                                            |
| Kathryn                           | Rowan       |                       |                  |             |                                          |                                                         |                                                                                            |
| Scott                             | Rowan-Ferry |                       |                  |             |                                          |                                                         |                                                                                            |

Supplemental Online Content: Nonauthor Collaborators

\*Indicates required information. Only first name, last name, and suffix will appear in PubMed.

| *First Name and Middle Initial(s) | *Last Name           | *Suffix (eg, Jr, III) | Academic Degrees | Institution | Location (city, state/province, country) | Role or Contribution, eg, chair, principal investigator | Group (if more than 1 Group listed in the byline) and/or Subgroup (eg, Steering Committee) |
|-----------------------------------|----------------------|-----------------------|------------------|-------------|------------------------------------------|---------------------------------------------------------|--------------------------------------------------------------------------------------------|
| Louise                            | Rowe-Leete           |                       |                  |             |                                          |                                                         |                                                                                            |
| Matthew                           | Rowland              |                       |                  |             |                                          |                                                         |                                                                                            |
| Megan                             | Rowley               |                       |                  |             |                                          |                                                         |                                                                                            |
| Alistair                          | Roy                  |                       |                  |             |                                          |                                                         |                                                                                            |
| Anna                              | Roynon-Reed          |                       |                  |             |                                          |                                                         |                                                                                            |
| Alison                            | Rudd                 |                       |                  |             |                                          |                                                         |                                                                                            |
| Winningtom                        | Ruiz                 |                       |                  |             |                                          |                                                         |                                                                                            |
| Patrizia                          | Ruoso                |                       |                  |             |                                          |                                                         |                                                                                            |
| Rosemary                          | Rushworth            |                       |                  |             |                                          |                                                         |                                                                                            |
| Lisa                              | Rusk                 |                       |                  |             |                                          |                                                         |                                                                                            |
| Kim                               | Ryalls               |                       |                  |             |                                          |                                                         |                                                                                            |
| Emily                             | Ryan                 |                       |                  |             |                                          |                                                         |                                                                                            |
| Lucy                              | Ryan                 |                       |                  |             |                                          |                                                         |                                                                                            |
| Nick                              | Rylance              |                       |                  |             |                                          |                                                         |                                                                                            |
| Suganya                           | Sabaretnam           |                       |                  |             |                                          |                                                         |                                                                                            |
| Umar                              | Sabat                |                       |                  |             |                                          |                                                         |                                                                                            |
| Rachel                            | Sackrowitz           |                       |                  |             |                                          |                                                         |                                                                                            |
| Girendra                          | Sadera               |                       |                  |             |                                          |                                                         |                                                                                            |
| Maria-Isabel                      | Saez-Garcia-Holloway |                       |                  |             |                                          |                                                         |                                                                                            |
| Sian                              | Saha                 |                       |                  |             |                                          |                                                         |                                                                                            |
| Armored                           | Salberg              |                       |                  |             |                                          |                                                         |                                                                                            |
| Jas                               | Sall                 |                       |                  |             |                                          |                                                         |                                                                                            |
| Angela                            | Salmon               |                       |                  |             |                                          |                                                         |                                                                                            |
| Karen                             | Salmon               |                       |                  |             |                                          |                                                         |                                                                                            |
| Nichola                           | Salmons              |                       |                  |             |                                          |                                                         |                                                                                            |
| Zoe                               | Sammut               |                       |                  |             |                                          |                                                         |                                                                                            |
| Lorraine                          | Samuel               |                       |                  |             |                                          |                                                         |                                                                                            |
| Francisco                         | San Diego            |                       |                  |             |                                          |                                                         |                                                                                            |
| Michael                           | Sanchez              |                       |                  |             |                                          |                                                         |                                                                                            |
| Amanda                            | Sanderson            |                       |                  |             |                                          |                                                         |                                                                                            |

Supplemental Online Content: Nonauthor Collaborators

\*Indicates required information. Only first name, last name, and suffix will appear in PubMed.

| *First Name and Middle Initial(s) | *Last Name         | *Suffix (eg, Jr, III) | Academic Degrees | Institution | Location (city, state/province, country) | Role or Contribution, eg, chair, principal investigator | Group (if more than 1 Group listed in the byline) and/or Subgroup (eg, Steering Committee) |
|-----------------------------------|--------------------|-----------------------|------------------|-------------|------------------------------------------|---------------------------------------------------------|--------------------------------------------------------------------------------------------|
| Colleen                           | Sanderson          |                       |                  |             |                                          |                                                         |                                                                                            |
| Gyan                              | Sandhu             |                       |                  |             |                                          |                                                         |                                                                                            |
| Ashish                            | Sanil              |                       |                  |             |                                          |                                                         |                                                                                            |
| Filipa                            | Santos             |                       |                  |             |                                          |                                                         |                                                                                            |
| Anita                             | Saran              |                       |                  |             |                                          |                                                         |                                                                                            |
| Sonia                             | Sathe              |                       |                  |             |                                          |                                                         |                                                                                            |
| Prasannakumari                    | Sathianathan       |                       |                  |             |                                          |                                                         |                                                                                            |
| Michelle                          | Saull              |                       |                  |             |                                          |                                                         |                                                                                            |
| Synthia                           | Sauvageau          |                       |                  |             |                                          |                                                         |                                                                                            |
| Robert                            | Sawler             |                       |                  |             |                                          |                                                         |                                                                                            |
| Manoj                             | Saxena             |                       |                  |             |                                          |                                                         |                                                                                            |
| Jeremy                            | Scanlan            |                       |                  |             |                                          |                                                         |                                                                                            |
| Riccardo                          | Scano              |                       |                  |             |                                          |                                                         |                                                                                            |
| Irma                              | Scheepstra-Beukers |                       |                  |             |                                          |                                                         |                                                                                            |
| Mark                              | Schmidhofer        |                       |                  |             |                                          |                                                         |                                                                                            |
| Andrew                            | Schoenling         |                       |                  |             |                                          |                                                         |                                                                                            |
| Joost                             | Schotsman          |                       |                  |             |                                          |                                                         |                                                                                            |
| Roxanne                           | Schroeder          |                       |                  |             |                                          |                                                         |                                                                                            |
| Marilyn                           | Schuett            |                       |                  |             |                                          |                                                         |                                                                                            |
| Martin                            | Schuster-Bruce     |                       |                  |             |                                          |                                                         |                                                                                            |
| Roger                             | Schutgens          |                       |                  |             |                                          |                                                         |                                                                                            |
| Sacha                             | Schweikert         |                       |                  |             |                                          |                                                         |                                                                                            |
| Andrew                            | Scott              |                       |                  |             |                                          |                                                         |                                                                                            |
| Kathryn                           | Scott              |                       |                  |             |                                          |                                                         |                                                                                            |
| Zoe                               | Scott              |                       |                  |             |                                          |                                                         |                                                                                            |
| Deborah                           | Seals              |                       |                  |             |                                          |                                                         |                                                                                            |
| Judy                              | Seaman             |                       |                  |             |                                          |                                                         |                                                                                            |
| Rebecca                           | Seaman             |                       |                  |             |                                          |                                                         |                                                                                            |
| Deborah                           | Seddon             |                       |                  |             |                                          |                                                         |                                                                                            |
| Faramarz                          | Sedigh-Zadeh       |                       |                  |             |                                          |                                                         |                                                                                            |
| Fatima                            | Seidu              |                       |                  |             |                                          |                                                         |                                                                                            |

Supplemental Online Content: Nonauthor Collaborators

\*Indicates required information. Only first name, last name, and suffix will appear in PubMed.

| *First Name and Middle Initial(s) | *Last Name     | *Suffix (eg, Jr, III) | Academic Degrees | Institution | Location (city, state/province, country) | Role or Contribution, eg, chair, principal investigator | Group (if more than 1 Group listed in the byline) and/or Subgroup (eg, Steering Committee) |
|-----------------------------------|----------------|-----------------------|------------------|-------------|------------------------------------------|---------------------------------------------------------|--------------------------------------------------------------------------------------------|
| Mallika                           | Sekhar         |                       |                  |             |                                          |                                                         |                                                                                            |
| Fernanco                          | Selene         |                       |                  |             |                                          |                                                         |                                                                                            |
| Jo                                | Sell           |                       |                  |             |                                          |                                                         |                                                                                            |
| Katharine                         | Sellers        |                       |                  |             |                                          |                                                         |                                                                                            |
| Helen                             | Senior         |                       |                  |             |                                          |                                                         |                                                                                            |
| Peter                             | Senior         |                       |                  |             |                                          |                                                         |                                                                                            |
| Ian                               | Seppelt        |                       |                  |             |                                          |                                                         |                                                                                            |
| Karim                             | Serri          |                       |                  |             |                                          |                                                         |                                                                                            |
| Chanthou                          | Sevilla        |                       |                  |             |                                          |                                                         |                                                                                            |
| Marlene                           | Shade          |                       |                  |             |                                          |                                                         |                                                                                            |
| Faraaz                            | Shah           |                       |                  |             |                                          |                                                         |                                                                                            |
| Tasnin                            | Shahid         |                       |                  |             |                                          |                                                         |                                                                                            |
| Manu                              | Shankar-Hari   |                       |                  |             |                                          |                                                         |                                                                                            |
| Shaminie                          | Shanmugaranjan |                       |                  |             |                                          |                                                         |                                                                                            |
| Kimberly                          | Shaughnessy    |                       |                  |             |                                          |                                                         |                                                                                            |
| David                             | Shaw           |                       |                  |             |                                          |                                                         |                                                                                            |
| Deborah                           | Shaw           |                       |                  |             |                                          |                                                         |                                                                                            |
| Joanne                            | Shaw           |                       |                  |             |                                          |                                                         |                                                                                            |
| Audrey                            | Shearer        |                       |                  |             |                                          |                                                         |                                                                                            |
| Ben                               | Sheath         |                       |                  |             |                                          |                                                         |                                                                                            |
| Jonathan                          | Sheffield      |                       |                  |             |                                          |                                                         |                                                                                            |
| Laura                             | Sheldon        |                       |                  |             |                                          |                                                         |                                                                                            |
| Sarah                             | Shelton        |                       |                  |             |                                          |                                                         |                                                                                            |
| Varun                             | Shetty         |                       |                  |             |                                          |                                                         |                                                                                            |
| Dylan                             | Shield         |                       |                  |             |                                          |                                                         |                                                                                            |
| Roger                             | Shiers         |                       |                  |             |                                          |                                                         |                                                                                            |
| Christine                         | Shin           |                       |                  |             |                                          |                                                         |                                                                                            |
| Kim                               | Shirley        |                       |                  |             |                                          |                                                         |                                                                                            |
| Richard                           | Shortland      |                       |                  |             |                                          |                                                         |                                                                                            |
| Charmaine                         | Shovelton      |                       |                  |             |                                          |                                                         |                                                                                            |
| Murali                            | Shyamsundar    |                       |                  |             |                                          |                                                         |                                                                                            |

Supplemental Online Content: Nonauthor Collaborators

\*Indicates required information. Only first name, last name, and suffix will appear in PubMed.

| *First Name and Middle Initial(s) | *Last Name  | *Suffix (eg, Jr, III) | Academic Degrees | Institution | Location (city, state/province, country) | Role or Contribution, eg, chair, principal investigator | Group (if more than 1 Group listed in the byline) and/or Subgroup (eg, Steering Committee) |
|-----------------------------------|-------------|-----------------------|------------------|-------------|------------------------------------------|---------------------------------------------------------|--------------------------------------------------------------------------------------------|
| Zanele                            | Sibanda     |                       |                  |             |                                          |                                                         |                                                                                            |
| Sindhu                            | Sibin       |                       |                  |             |                                          |                                                         |                                                                                            |
| Christine                         | Sicat       |                       |                  |             |                                          |                                                         |                                                                                            |
| Atif                              | Siddiqui    |                       |                  |             |                                          |                                                         |                                                                                            |
| Monyra                            | Siek        |                       |                  |             |                                          |                                                         |                                                                                            |
| Chris                             | Siewersk    |                       |                  |             |                                          |                                                         |                                                                                            |
| Nyma                              | Sikondari   |                       |                  |             |                                          |                                                         |                                                                                            |
| Adrienne                          | Silver      |                       |                  |             |                                          |                                                         |                                                                                            |
| Mike                              | Silverstone |                       |                  |             |                                          |                                                         |                                                                                            |
| Malcolm AB                        | Sim         |                       |                  |             |                                          |                                                         |                                                                                            |
| Carl                              | Simard      |                       |                  |             |                                          |                                                         |                                                                                            |
| Peter                             | Simmonds    |                       |                  |             |                                          |                                                         |                                                                                            |
| Benjamin                          | Simpson     |                       |                  |             |                                          |                                                         |                                                                                            |
| Brenda                            | Simpson     |                       |                  |             |                                          |                                                         |                                                                                            |
| John                              | Simpson     |                       |                  |             |                                          |                                                         |                                                                                            |
| Tom                               | Simpson     |                       |                  |             |                                          |                                                         |                                                                                            |
| Andrew                            | Simpson     |                       |                  |             |                                          |                                                         |                                                                                            |
| Julie-Ann                         | Sinclair    |                       |                  |             |                                          |                                                         |                                                                                            |
| Jayaprakash                       | Singh       |                       |                  |             |                                          |                                                         |                                                                                            |
| Rajeev                            | Singh       |                       |                  |             |                                          |                                                         |                                                                                            |
| Vanessa                           | Singh       |                       |                  |             |                                          |                                                         |                                                                                            |
| Jo                                | Singleton   |                       |                  |             |                                          |                                                         |                                                                                            |
| Pratik                            | Sinha       |                       |                  |             |                                          |                                                         |                                                                                            |
| Rebecca                           | Sivers      |                       |                  |             |                                          |                                                         |                                                                                            |
| Alison                            | Sivyer      |                       |                  |             |                                          |                                                         |                                                                                            |
| Michael John                      | Skill       |                       |                  |             |                                          |                                                         |                                                                                            |
| Denise                            | Skinner     |                       |                  |             |                                          |                                                         |                                                                                            |
| Tabitha                           | Skinner     |                       |                  |             |                                          |                                                         |                                                                                            |
| Agnieszka                         | Skorko      |                       |                  |             |                                          |                                                         |                                                                                            |
| Aimee                             | Skrnich     |                       |                  |             |                                          |                                                         |                                                                                            |
| Wendy                             | Slack       |                       |                  |             |                                          |                                                         |                                                                                            |



Supplemental Online Content: Nonauthor Collaborators

\*Indicates required information. Only first name, last name, and suffix will appear in PubMed.

| *First Name and Middle Initial(s) | *Last Name | *Suffix (eg, Jr, III) | Academic Degrees | Institution | Location (city, state/province, country) | Role or Contribution, eg, chair, principal investigator | Group (if more than 1 Group listed in the byline) and/or Subgroup (eg, Steering Committee) |
|-----------------------------------|------------|-----------------------|------------------|-------------|------------------------------------------|---------------------------------------------------------|--------------------------------------------------------------------------------------------|
| Helen                             | Slade      |                       |                  |             |                                          |                                                         |                                                                                            |
| Melanie                           | Slaughter  |                       |                  |             |                                          |                                                         |                                                                                            |
| Wendy                             | Sligl      |                       |                  |             |                                          |                                                         |                                                                                            |
| Janice                            | Sloan      |                       |                  |             |                                          |                                                         |                                                                                            |
| Charlotte                         | Small      |                       |                  |             |                                          |                                                         |                                                                                            |
| Emma                              | Small      |                       |                  |             |                                          |                                                         |                                                                                            |
| Andrew                            | Smallwood  |                       |                  |             |                                          |                                                         |                                                                                            |
| Joanna                            | Smee       |                       |                  |             |                                          |                                                         |                                                                                            |
| Albertine                         | Smit       |                       |                  |             |                                          |                                                         |                                                                                            |
| Anna                              | Smith      |                       |                  |             |                                          |                                                         |                                                                                            |
| Catherine                         | Smith      |                       |                  |             |                                          |                                                         |                                                                                            |
| Graham                            | Smith      |                       |                  |             |                                          |                                                         |                                                                                            |
| John                              | Smith      |                       |                  |             |                                          |                                                         |                                                                                            |
| Juliet                            | Smith      |                       |                  |             |                                          |                                                         |                                                                                            |
| Katie                             | Smith      |                       |                  |             |                                          |                                                         |                                                                                            |
| Lucie                             | Smith      |                       |                  |             |                                          |                                                         |                                                                                            |
| Matthew                           | Smith      |                       |                  |             |                                          |                                                         |                                                                                            |
| Patricia                          | Smith      |                       |                  |             |                                          |                                                         |                                                                                            |
| Paul                              | Smith      |                       |                  |             |                                          |                                                         |                                                                                            |
| Ruth                              | Smith      |                       |                  |             |                                          |                                                         |                                                                                            |
| Simon                             | Smith      |                       |                  |             |                                          |                                                         |                                                                                            |
| Timothy                           | Smith      |                       |                  |             |                                          |                                                         |                                                                                            |
| Tracy                             | Smith      |                       |                  |             |                                          |                                                         |                                                                                            |
| Gemma                             | Smithson   |                       |                  |             |                                          |                                                         |                                                                                            |
| Sara                              | Smuts      |                       |                  |             |                                          |                                                         |                                                                                            |
| Janet                             | Smyrski    |                       |                  |             |                                          |                                                         |                                                                                            |
| Kirsty                            | Smyth      |                       |                  |             |                                          |                                                         |                                                                                            |
| Naoise                            | Smyth      |                       |                  |             |                                          |                                                         |                                                                                            |
| Naomi                             | Smyth      |                       |                  |             |                                          |                                                         |                                                                                            |
| Leila                             | Snouber    |                       |                  |             |                                          |                                                         |                                                                                            |
| Mary                              | Sokolowski |                       |                  |             |                                          |                                                         |                                                                                            |

Supplemental Online Content: Nonauthor Collaborators

\*Indicates required information. Only first name, last name, and suffix will appear in PubMed.

| *First Name and Middle Initial(s) | *Last Name           | *Suffix (eg, Jr, III) | Academic Degrees | Institution | Location (city, state/province, country) | Role or Contribution, eg, chair, principal investigator | Group (if more than 1 Group listed in the byline and/or Subgroup (eg, Steering Committee)) |
|-----------------------------------|----------------------|-----------------------|------------------|-------------|------------------------------------------|---------------------------------------------------------|--------------------------------------------------------------------------------------------|
| Amanda                            | Solesbury            |                       |                  |             |                                          |                                                         |                                                                                            |
| Alastair                          | Somerville           |                       |                  |             |                                          |                                                         |                                                                                            |
| Tom                               | Song                 |                       |                  |             |                                          |                                                         |                                                                                            |
| Deepti                            | Sood                 |                       |                  |             |                                          |                                                         |                                                                                            |
| Monique                           | Sosa                 |                       |                  |             |                                          |                                                         |                                                                                            |
| Sonia                             | Sousa Arias          |                       |                  |             |                                          |                                                         |                                                                                            |
| David                             | Southern             |                       |                  |             |                                          |                                                         |                                                                                            |
| Jennifer                          | Speidel              |                       |                  |             |                                          |                                                         |                                                                                            |
| Holly                             | Speight              |                       |                  |             |                                          |                                                         |                                                                                            |
| John                              | Spence               |                       |                  |             |                                          |                                                         |                                                                                            |
| Stephen                           | Spencer              |                       |                  |             |                                          |                                                         |                                                                                            |
| Helen                             | Spicer               |                       |                  |             |                                          |                                                         |                                                                                            |
| Rose                              | Spicer               |                       |                  |             |                                          |                                                         |                                                                                            |
| Bridgette                         | Spires               |                       |                  |             |                                          |                                                         |                                                                                            |
| Adam                              | Spong                |                       |                  |             |                                          |                                                         |                                                                                            |
| Karen                             | Spreckley            |                       |                  |             |                                          |                                                         |                                                                                            |
| Scott                             | Springworth          |                       |                  |             |                                          |                                                         |                                                                                            |
| Rebecca                           | Squires              |                       |                  |             |                                          |                                                         |                                                                                            |
| Carole                            | St Onge-Legault      |                       |                  |             |                                          |                                                         |                                                                                            |
| Chloe                             | Stacey               |                       |                  |             |                                          |                                                         |                                                                                            |
| Tony                              | Staincliffe          |                       |                  |             |                                          |                                                         |                                                                                            |
| Martha                            | Stambaugh            |                       |                  |             |                                          |                                                         |                                                                                            |
| Katie                             | Stammers             |                       |                  |             |                                          |                                                         |                                                                                            |
| Simon J                           | Stanworth            |                       |                  |             |                                          |                                                         |                                                                                            |
| Julie                             | Staves               |                       |                  |             |                                          |                                                         |                                                                                            |
| Roger                             | Stedman              |                       |                  |             |                                          |                                                         |                                                                                            |
| Tony                              | Steed                |                       |                  |             |                                          |                                                         |                                                                                            |
| Stefan                            | Stefan Sprinckmoller |                       |                  |             |                                          |                                                         |                                                                                            |
| Martin                            | Sterba               |                       |                  |             |                                          |                                                         |                                                                                            |
| Georgia                           | Stevens              |                       |                  |             |                                          |                                                         |                                                                                            |
| Guy                               | Stevens              |                       |                  |             |                                          |                                                         |                                                                                            |

Supplemental Online Content: Nonauthor Collaborators

\*Indicates required information. Only first name, last name, and suffix will appear in PubMed.

| *First Name and Middle Initial(s) | *Last Name  | *Suffix (eg, Jr, III) | Academic Degrees | Institution | Location (city, state/province, country) | Role or Contribution, eg, chair, principal investigator | Group (if more than 1 Group listed in the byline) and/or Subgroup (eg, Steering Committee) |
|-----------------------------------|-------------|-----------------------|------------------|-------------|------------------------------------------|---------------------------------------------------------|--------------------------------------------------------------------------------------------|
| Elaine                            | Stevenson   |                       |                  |             |                                          |                                                         |                                                                                            |
| Amanda                            | Stewart     |                       |                  |             |                                          |                                                         |                                                                                            |
| Rebecca                           | Stewart     |                       |                  |             |                                          |                                                         |                                                                                            |
| Richard                           | Stewart     |                       |                  |             |                                          |                                                         |                                                                                            |
| Robert                            | Stirk       |                       |                  |             |                                          |                                                         |                                                                                            |
| Melanie                           | St-John     |                       |                  |             |                                          |                                                         |                                                                                            |
| Sarah                             | Stone       |                       |                  |             |                                          |                                                         |                                                                                            |
| Ellen                             | Strakosch   |                       |                  |             |                                          |                                                         |                                                                                            |
| Emma                              | Stratton    |                       |                  |             |                                          |                                                         |                                                                                            |
| Luke                              | Streeter    |                       |                  |             |                                          |                                                         |                                                                                            |
| Tomeka                            | Suber       |                       |                  |             |                                          |                                                         |                                                                                            |
| Lee                               | Sudlow      |                       |                  |             |                                          |                                                         |                                                                                            |
| Anila                             | Sukuraman   |                       |                  |             |                                          |                                                         |                                                                                            |
| Nina                              | Sull        |                       |                  |             |                                          |                                                         |                                                                                            |
| Anna                              | Summerfield |                       |                  |             |                                          |                                                         |                                                                                            |
| Charlotte                         | Summers     |                       |                  |             |                                          |                                                         |                                                                                            |
| Jennifer                          | Summers     |                       |                  |             |                                          |                                                         |                                                                                            |
| Ashok                             | Sundar Raj  |                       |                  |             |                                          |                                                         |                                                                                            |
| Radha                             | Sundaram    |                       |                  |             |                                          |                                                         |                                                                                            |
| Dhinesh                           | Sundaran    |                       |                  |             |                                          |                                                         |                                                                                            |
| Helen                             | Sutherland  |                       |                  |             |                                          |                                                         |                                                                                            |
| Sara-Beth                         | Sutherland  |                       |                  |             |                                          |                                                         |                                                                                            |
| Sharon                            | Sutherland  |                       |                  |             |                                          |                                                         |                                                                                            |
| John                              | Sutton      |                       |                  |             |                                          |                                                         |                                                                                            |
| Mihaela                           | Sutu        |                       |                  |             |                                          |                                                         |                                                                                            |
| Jacqueline                        | Swabe       |                       |                  |             |                                          |                                                         |                                                                                            |
| Lorna                             | Swan        |                       |                  |             |                                          |                                                         |                                                                                            |
| Nicola                            | Swarbrick   |                       |                  |             |                                          |                                                         |                                                                                            |
| Katie                             | Sweet       |                       |                  |             |                                          |                                                         |                                                                                            |
| Samaher                           | Sweity      |                       |                  |             |                                          |                                                         |                                                                                            |
| Eric                              | Sy          |                       |                  |             |                                          |                                                         |                                                                                            |

Supplemental Online Content: Nonauthor Collaborators

\*Indicates required information. Only first name, last name, and suffix will appear in PubMed.

| *First Name and Middle Initial(s) | *Last Name     | *Suffix (eg, Jr, III) | Academic Degrees | Institution | Location (city, state/province, country) | Role or Contribution, eg, chair, principal investigator | Group (if more than 1 Group listed in the byline and/or Subgroup (eg, Steering Committee)) |
|-----------------------------------|----------------|-----------------------|------------------|-------------|------------------------------------------|---------------------------------------------------------|--------------------------------------------------------------------------------------------|
| Tamas                             | Szakmany       |                       |                  |             |                                          |                                                         |                                                                                            |
| Helen                             | Tackaberry     |                       |                  |             |                                          |                                                         |                                                                                            |
| Malik                             | Tahir Saleem   |                       |                  |             |                                          |                                                         |                                                                                            |
| Silvia                            | Taibo          |                       |                  |             |                                          |                                                         |                                                                                            |
| Nadine                            | Talia          |                       |                  |             |                                          |                                                         |                                                                                            |
| Phoebe                            | Tamblin-Hopper |                       |                  |             |                                          |                                                         |                                                                                            |
| Jade                              | Tan            |                       |                  |             |                                          |                                                         |                                                                                            |
| Xiaohui                           | Tang           |                       |                  |             |                                          |                                                         |                                                                                            |
| Ran                               | Tao            |                       |                  |             |                                          |                                                         |                                                                                            |
| Esther                            | Tarr           |                       |                  |             |                                          |                                                         |                                                                                            |
| Donna                             | Tasker         |                       |                  |             |                                          |                                                         |                                                                                            |
| Margaret                          | Tate           |                       |                  |             |                                          |                                                         |                                                                                            |
| Margaret L                        | Tate           |                       |                  |             |                                          |                                                         |                                                                                            |
| Kate C                            | Tatham         |                       |                  |             |                                          |                                                         |                                                                                            |
| Mohammed N                        | Tawfik Altomy  |                       |                  |             |                                          |                                                         |                                                                                            |
| Ashley                            | Taylor         |                       |                  |             |                                          |                                                         |                                                                                            |
| Brian                             | Taylor         |                       |                  |             |                                          |                                                         |                                                                                            |
| Charlotte                         | Taylor         |                       |                  |             |                                          |                                                         |                                                                                            |
| Holly                             | Taylor         |                       |                  |             |                                          |                                                         |                                                                                            |
| Melanie                           | Taylor         |                       |                  |             |                                          |                                                         |                                                                                            |
| Seble                             | Tekle          |                       |                  |             |                                          |                                                         |                                                                                            |
| Saba                              | Teklehaimanot  |                       |                  |             |                                          |                                                         |                                                                                            |
| Holly                             | Templar        |                       |                  |             |                                          |                                                         |                                                                                            |
| Maie                              | Templeton      |                       |                  |             |                                          |                                                         |                                                                                            |
| Patricia                          | Tendler        |                       |                  |             |                                          |                                                         |                                                                                            |
| Abbi                              | Tervit         |                       |                  |             |                                          |                                                         |                                                                                            |
| Kate                              | Tettmar        |                       |                  |             |                                          |                                                         |                                                                                            |
| Susan                             | Theander       |                       |                  |             |                                          |                                                         |                                                                                            |
| Stéphane                          | Thellend       |                       |                  |             |                                          |                                                         |                                                                                            |
| Amy                               | Thomas         |                       |                  |             |                                          |                                                         |                                                                                            |

Supplemental Online Content: Nonauthor Collaborators

\*Indicates required information. Only first name, last name, and suffix will appear in PubMed.

| *First Name and Middle Initial(s) | *Last Name    | *Suffix (eg, Jr, III) | Academic Degrees | Institution | Location (city, state/province, country) | Role or Contribution, eg, chair, principal investigator | Group (if more than 1 Group listed in the byline) and/or Subgroup (eg, Steering Committee) |
|-----------------------------------|---------------|-----------------------|------------------|-------------|------------------------------------------|---------------------------------------------------------|--------------------------------------------------------------------------------------------|
| Deepak                            | Thomas        |                       |                  |             |                                          |                                                         |                                                                                            |
| Emma                              | Thomas        |                       |                  |             |                                          |                                                         |                                                                                            |
| Helen                             | Thomas        |                       |                  |             |                                          |                                                         |                                                                                            |
| Vicky                             | Thomas        |                       |                  |             |                                          |                                                         |                                                                                            |
| Samantha                          | Thomas-Wright |                       |                  |             |                                          |                                                         |                                                                                            |
| Patricia                          | Thompson      |                       |                  |             |                                          |                                                         |                                                                                            |
| Taylor                            | Thompson      |                       |                  |             |                                          |                                                         |                                                                                            |
| Usilla                            | Thompson      |                       |                  |             |                                          |                                                         |                                                                                            |
| Nicola                            | Thomson       |                       |                  |             |                                          |                                                         |                                                                                            |
| Wendy                             | Thorne        |                       |                  |             |                                          |                                                         |                                                                                            |
| Allison                           | Thorpe        |                       |                  |             |                                          |                                                         |                                                                                            |
| Jessica                           | Thrush        |                       |                  |             |                                          |                                                         |                                                                                            |
| Saranya                           | Thurairatnam  |                       |                  |             |                                          |                                                         |                                                                                            |
| Carey                             | Tierney       |                       |                  |             |                                          |                                                         |                                                                                            |
| Emma M                            | Timms         |                       |                  |             |                                          |                                                         |                                                                                            |
| Melanie                           | Tokessy       |                       |                  |             |                                          |                                                         |                                                                                            |
| Timo                              | Tolppa        |                       |                  |             |                                          |                                                         |                                                                                            |
| Helen                             | Tomlinson     |                       |                  |             |                                          |                                                         |                                                                                            |
| Steven                            | Tong          |                       |                  |             |                                          |                                                         |                                                                                            |
| Kiran                             | Tony          |                       |                  |             |                                          |                                                         |                                                                                            |
| Sylvia                            | Torrance      |                       |                  |             |                                          |                                                         |                                                                                            |
| Isabella                          | Tosi          |                       |                  |             |                                          |                                                         |                                                                                            |
| Omar                              | Touma         |                       |                  |             |                                          |                                                         |                                                                                            |
| Jason                             | Towler        |                       |                  |             |                                          |                                                         |                                                                                            |
| Miriam                            | Towns         |                       |                  |             |                                          |                                                         |                                                                                            |
| Alain                             | Townsend      |                       |                  |             |                                          |                                                         |                                                                                            |
| Chris                             | Townsend      |                       |                  |             |                                          |                                                         |                                                                                            |
| Andrew                            | Tracy         |                       |                  |             |                                          |                                                         |                                                                                            |
| Claire                            | Tranter       |                       |                  |             |                                          |                                                         |                                                                                            |
| Tony                              | Trapani       |                       |                  |             |                                          |                                                         |                                                                                            |
| Jonathan                          | Trattles      |                       |                  |             |                                          |                                                         |                                                                                            |

Supplemental Online Content: Nonauthor Collaborators

\*Indicates required information. Only first name, last name, and suffix will appear in PubMed.

| *First Name and Middle Initial(s) | *Last Name    | *Suffix (eg, Jr, III) | Academic Degrees | Institution | Location (city, state/province, country) | Role or Contribution, eg, chair, principal investigator | Group (if more than 1 Group listed in the byline) and/or Subgroup (eg, Steering Committee) |
|-----------------------------------|---------------|-----------------------|------------------|-------------|------------------------------------------|---------------------------------------------------------|--------------------------------------------------------------------------------------------|
| Eleanor                           | Traverse      |                       |                  |             |                                          |                                                         |                                                                                            |
| Sylvie                            | Tremblay      |                       |                  |             |                                          |                                                         |                                                                                            |
| Tony                              | Tremblay      |                       |                  |             |                                          |                                                         |                                                                                            |
| Karis                             | Treuberg      |                       |                  |             |                                          |                                                         |                                                                                            |
| Silvia C                          | Trevelin      |                       |                  |             |                                          |                                                         |                                                                                            |
| Michael                           | Trevett       |                       |                  |             |                                          |                                                         |                                                                                            |
| Mike                              | Trevett       |                       |                  |             |                                          |                                                         |                                                                                            |
| Fiona                             | Trim          |                       |                  |             |                                          |                                                         |                                                                                            |
| Thomas                            | Trimble       |                       |                  |             |                                          |                                                         |                                                                                            |
| Ken                               | Trimmer       |                       |                  |             |                                          |                                                         |                                                                                            |
| Annette                           | Trueman       |                       |                  |             |                                          |                                                         |                                                                                            |
| Nicholas                          | Truman        |                       |                  |             |                                          |                                                         |                                                                                            |
| Sara                              | Tryon         |                       |                  |             |                                          |                                                         |                                                                                            |
| Kyriaki                           | Tsakiridou    |                       |                  |             |                                          |                                                         |                                                                                            |
| Hoi Pat                           | Tsang         |                       |                  |             |                                          |                                                         |                                                                                            |
| Jennifer                          | Tsang         |                       |                  |             |                                          |                                                         |                                                                                            |
| Georgios                          | Tsinaslanidis |                       |                  |             |                                          |                                                         |                                                                                            |
| Victoria                          | Tuckley       |                       |                  |             |                                          |                                                         |                                                                                            |
| Caroline                          | Tuckwell      |                       |                  |             |                                          |                                                         |                                                                                            |
| Redmond P                         | Tully         |                       |                  |             |                                          |                                                         |                                                                                            |
| Raymond                           | Tung          |                       |                  |             |                                          |                                                         |                                                                                            |
| Saidat                            | Turawa        |                       |                  |             |                                          |                                                         |                                                                                            |
| Anna                              | Turco         |                       |                  |             |                                          |                                                         |                                                                                            |
| Krystyna                          | Turek         |                       |                  |             |                                          |                                                         |                                                                                            |
| Salah                             | Turki         |                       |                  |             |                                          |                                                         |                                                                                            |
| David                             | Turner        |                       |                  |             |                                          |                                                         |                                                                                            |
| Frances                           | Turner        |                       |                  |             |                                          |                                                         |                                                                                            |
| Keri                              | Turner        |                       |                  |             |                                          |                                                         |                                                                                            |
| Louise                            | Turner        |                       |                  |             |                                          |                                                         |                                                                                            |
| Marc                              | Turner        |                       |                  |             |                                          |                                                         |                                                                                            |
| Ruth                              | Turner        |                       |                  |             |                                          |                                                         |                                                                                            |

Supplemental Online Content: Nonauthor Collaborators

\*Indicates required information. Only first name, last name, and suffix will appear in PubMed.

| *First Name and Middle Initial(s) | *Last Name     | *Suffix (eg, Jr, III) | Academic Degrees | Institution | Location (city, state/province, country) | Role or Contribution, eg, chair, principal investigator | Group (if more than 1 Group listed in the byline) and/or Subgroup (eg, Steering Committee) |
|-----------------------------------|----------------|-----------------------|------------------|-------------|------------------------------------------|---------------------------------------------------------|--------------------------------------------------------------------------------------------|
| Susan                             | Turner         |                       |                  |             |                                          |                                                         |                                                                                            |
| Ian                               | Turner-Bone    |                       |                  |             |                                          |                                                         |                                                                                            |
| Margaret                          | Turns          |                       |                  |             |                                          |                                                         |                                                                                            |
| Stuart                            | Turville       |                       |                  |             |                                          |                                                         |                                                                                            |
| Ishara                            | Udayanga       |                       |                  |             |                                          |                                                         |                                                                                            |
| Ruzena                            | Uddin          |                       |                  |             |                                          |                                                         |                                                                                            |
| Andrew                            | Udy            |                       |                  |             |                                          |                                                         |                                                                                            |
| Laura                             | Unitt          |                       |                  |             |                                          |                                                         |                                                                                            |
| Adam                              | Unsworth       |                       |                  |             |                                          |                                                         |                                                                                            |
| Jassy                             | Uppal          |                       |                  |             |                                          |                                                         |                                                                                            |
| James                             | Uprichard      |                       |                  |             |                                          |                                                         |                                                                                            |
| Alison                            | Uriel          |                       |                  |             |                                          |                                                         |                                                                                            |
| Andrew                            | Ustianowski    |                       |                  |             |                                          |                                                         |                                                                                            |
| Jane                              | Uttley         |                       |                  |             |                                          |                                                         |                                                                                            |
| Tim                               | Uyeki          |                       |                  |             |                                          |                                                         |                                                                                            |
| Eliza                             | Valentine      |                       |                  |             |                                          |                                                         |                                                                                            |
| Luke                              | Vamplew        |                       |                  |             |                                          |                                                         |                                                                                            |
| Tom                               | van der Poll   |                       |                  |             |                                          |                                                         |                                                                                            |
| Caryn                             | Van der Riet   |                       |                  |             |                                          |                                                         |                                                                                            |
| Denise                            | van Hout       |                       |                  |             |                                          |                                                         |                                                                                            |
| Roland                            | van Kimmenade  |                       |                  |             |                                          |                                                         |                                                                                            |
| Marloes                           | van Beurden    |                       |                  |             |                                          |                                                         |                                                                                            |
| Jonni-Lyn                         | Van Deursen    |                       |                  |             |                                          |                                                         |                                                                                            |
| William                           | Van't Hoff     |                       |                  |             |                                          |                                                         |                                                                                            |
| Kate                              | Vardigans      |                       |                  |             |                                          |                                                         |                                                                                            |
| Siby                              | Varghese       |                       |                  |             |                                          |                                                         |                                                                                            |
| Gloria                            | Vazquez-Grande |                       |                  |             |                                          |                                                         |                                                                                            |
| Austin                            | Veen           |                       |                  |             |                                          |                                                         |                                                                                            |
| Tonny                             | Veenith        |                       |                  |             |                                          |                                                         |                                                                                            |
| Maxime                            | Veillette      |                       |                  |             |                                          |                                                         |                                                                                            |
| Tracy                             | Velcich        |                       |                  |             |                                          |                                                         |                                                                                            |

Supplemental Online Content: Nonauthor Collaborators

\*Indicates required information. Only first name, last name, and suffix will appear in PubMed.

| *First Name and Middle Initial(s) | *Last Name   | *Suffix (eg, Jr, III) | Academic Degrees | Institution | Location (city, state/province, country) | Role or Contribution, eg, chair, principal investigator | Group (if more than 1 Group listed in the byline) and/or Subgroup (eg, Steering Committee) |
|-----------------------------------|--------------|-----------------------|------------------|-------------|------------------------------------------|---------------------------------------------------------|--------------------------------------------------------------------------------------------|
| David                             | Veniard      |                       |                  |             |                                          |                                                         |                                                                                            |
| Bala                              | Venkatesh    |                       |                  |             |                                          |                                                         |                                                                                            |
| Ellen                             | Venz         |                       |                  |             |                                          |                                                         |                                                                                            |
| Mark                              | Verlander    |                       |                  |             |                                          |                                                         |                                                                                            |
| Mark                              | Vertue       |                       |                  |             |                                          |                                                         |                                                                                            |
| Jerik                             | Verula       |                       |                  |             |                                          |                                                         |                                                                                            |
| Catherine                         | Viau         |                       |                  |             |                                          |                                                         |                                                                                            |
| Saji                              | Victor       |                       |                  |             |                                          |                                                         |                                                                                            |
| Alex                              | Viehman      |                       |                  |             |                                          |                                                         |                                                                                            |
| Wayne                             | Vietri       |                       |                  |             |                                          |                                                         |                                                                                            |
| Steve                             | Villeneuve   |                       |                  |             |                                          |                                                         |                                                                                            |
| Sudharkar                         | Vimalanathan |                       |                  |             |                                          |                                                         |                                                                                            |
| Rachel                            | Vincent      |                       |                  |             |                                          |                                                         |                                                                                            |
| Satwinder                         | Virdee       |                       |                  |             |                                          |                                                         |                                                                                            |
| Leanne                            | Voutour      |                       |                  |             |                                          |                                                         |                                                                                            |
| Alain                             | Vuylsteke    |                       |                  |             |                                          |                                                         |                                                                                            |
| Alicia                            | Waite        |                       |                  |             |                                          |                                                         |                                                                                            |
| Andrew                            | Walden       |                       |                  |             |                                          |                                                         |                                                                                            |
| Jane                              | Walden       |                       |                  |             |                                          |                                                         |                                                                                            |
| Greg                              | Walker       |                       |                  |             |                                          |                                                         |                                                                                            |
| Jasmine                           | Walker       |                       |                  |             |                                          |                                                         |                                                                                            |
| Marie Teresa                      | Walker       |                       |                  |             |                                          |                                                         |                                                                                            |
| Rachel                            | Walker       |                       |                  |             |                                          |                                                         |                                                                                            |
| Susan                             | Walker       |                       |                  |             |                                          |                                                         |                                                                                            |
| Derek                             | Wallbank     |                       |                  |             |                                          |                                                         |                                                                                            |
| Fiona                             | Waller       |                       |                  |             |                                          |                                                         |                                                                                            |
| Joanne                            | Walsh        |                       |                  |             |                                          |                                                         |                                                                                            |
| James                             | Walsham      |                       |                  |             |                                          |                                                         |                                                                                            |
| Sherry                            | Walters      |                       |                  |             |                                          |                                                         |                                                                                            |
| Eleanor                           | Ward         |                       |                  |             |                                          |                                                         |                                                                                            |
| Geraldine                         | Ward         |                       |                  |             |                                          |                                                         |                                                                                            |



Supplemental Online Content: Nonauthor Collaborators

\*Indicates required information. Only first name, last name, and suffix will appear in PubMed.

| *First Name and Middle Initial(s) | *Last Name  | *Suffix (eg, Jr, III) | Academic Degrees | Institution | Location (city, state/province, country) | Role or Contribution, eg, chair, principal investigator | Group (if more than 1 Group listed in the byline) and/or Subgroup (eg, Steering Committee) |
|-----------------------------------|-------------|-----------------------|------------------|-------------|------------------------------------------|---------------------------------------------------------|--------------------------------------------------------------------------------------------|
| Kathryn                           | Ward        |                       |                  |             |                                          |                                                         |                                                                                            |
| Luke                              | Ward        |                       |                  |             |                                          |                                                         |                                                                                            |
| Rebecca                           | Ward        |                       |                  |             |                                          |                                                         |                                                                                            |
| Adele                             | Wardle      |                       |                  |             |                                          |                                                         |                                                                                            |
| Majella                           | Warnock     |                       |                  |             |                                          |                                                         |                                                                                            |
| Lea                               | Warren      |                       |                  |             |                                          |                                                         |                                                                                            |
| Charlotte                         | Washington  |                       |                  |             |                                          |                                                         |                                                                                            |
| Olivia                            | Watchorn    |                       |                  |             |                                          |                                                         |                                                                                            |
| Abby                              | Waters      |                       |                  |             |                                          |                                                         |                                                                                            |
| Sharon                            | Waterson    |                       |                  |             |                                          |                                                         |                                                                                            |
| Claire                            | Watkins     |                       |                  |             |                                          |                                                         |                                                                                            |
| Nick                              | Watkins     |                       |                  |             |                                          |                                                         |                                                                                            |
| Irene                             | Watpool     |                       |                  |             |                                          |                                                         |                                                                                            |
| Angela                            | Watts       |                       |                  |             |                                          |                                                         |                                                                                            |
| Victoria                          | Waugh       |                       |                  |             |                                          |                                                         |                                                                                            |
| Paul                              | Weaver      |                       |                  |             |                                          |                                                         |                                                                                            |
| Lisa                              | Weber       |                       |                  |             |                                          |                                                         |                                                                                            |
| Kathryn                           | Webert      |                       |                  |             |                                          |                                                         |                                                                                            |
| Thanuja                           | Weerasinghe |                       |                  |             |                                          |                                                         |                                                                                            |
| Alexandra                         | Weissman    |                       |                  |             |                                          |                                                         |                                                                                            |
| Colin                             | Wells       |                       |                  |             |                                          |                                                         |                                                                                            |
| Ingeborg D                        | Welters     |                       |                  |             |                                          |                                                         |                                                                                            |
| James                             | Wesson      |                       |                  |             |                                          |                                                         |                                                                                            |
| Jim                               | Wesson      |                       |                  |             |                                          |                                                         |                                                                                            |
| Adam                              | West        |                       |                  |             |                                          |                                                         |                                                                                            |
| Samantha                          | Westlake    |                       |                  |             |                                          |                                                         |                                                                                            |
| Bill                              | Wetherill   |                       |                  |             |                                          |                                                         |                                                                                            |
| Alison                            | White       |                       |                  |             |                                          |                                                         |                                                                                            |
| Ian                               | White       |                       |                  |             |                                          |                                                         |                                                                                            |
| Katie                             | White       |                       |                  |             |                                          |                                                         |                                                                                            |
| Stephen                           | White       |                       |                  |             |                                          |                                                         |                                                                                            |

Supplemental Online Content: Nonauthor Collaborators

\*Indicates required information. Only first name, last name, and suffix will appear in PubMed.

| *First Name and Middle Initial(s) | *Last Name | *Suffix (eg, Jr, III) | Academic Degrees | Institution | Location (city, state/province, country) | Role or Contribution, eg, chair, principal investigator | Group (if more than 1 Group listed in the byline) and/or Subgroup (eg, Steering Committee) |
|-----------------------------------|------------|-----------------------|------------------|-------------|------------------------------------------|---------------------------------------------------------|--------------------------------------------------------------------------------------------|
| Tony                              | Whitehouse |                       |                  |             |                                          |                                                         |                                                                                            |
| Victoria                          | Whiteside  |                       |                  |             |                                          |                                                         |                                                                                            |
| Kaitlyn                           | Whitley    |                       |                  |             |                                          |                                                         |                                                                                            |
| Melanie                           | Whynot     |                       |                  |             |                                          |                                                         |                                                                                            |
| Bradley                           | Wibrow     |                       |                  |             |                                          |                                                         |                                                                                            |
| Elizabeth                         | Wilby      |                       |                  |             |                                          |                                                         |                                                                                            |
| Elizabeth                         | Wilcox     |                       |                  |             |                                          |                                                         |                                                                                            |
| Louise                            | Wilcox     |                       |                  |             |                                          |                                                         |                                                                                            |
| Helen                             | Wild       |                       |                  |             |                                          |                                                         |                                                                                            |
| Laura                             | Wild       |                       |                  |             |                                          |                                                         |                                                                                            |
| Laura                             | Wilding    |                       |                  |             |                                          |                                                         |                                                                                            |
| Ritchie                           | Wildman    |                       |                  |             |                                          |                                                         |                                                                                            |
| Donna                             | Wiles      |                       |                  |             |                                          |                                                         |                                                                                            |
| Matt                              | Wiles      |                       |                  |             |                                          |                                                         |                                                                                            |
| Daisy                             | Wiley      |                       |                  |             |                                          |                                                         |                                                                                            |
| Elva                              | Wilhelmsen |                       |                  |             |                                          |                                                         |                                                                                            |
| Chloe                             | Wilkes     |                       |                  |             |                                          |                                                         |                                                                                            |
| Dean                              | Wilkinson  |                       |                  |             |                                          |                                                         |                                                                                            |
| Helen                             | Wilkinson  |                       |                  |             |                                          |                                                         |                                                                                            |
| Holly                             | Wilkinson  |                       |                  |             |                                          |                                                         |                                                                                            |
| Felicity                          | Williams   |                       |                  |             |                                          |                                                         |                                                                                            |
| Alexandra                         | Williams   |                       |                  |             |                                          |                                                         |                                                                                            |
| Angharad                          | Williams   |                       |                  |             |                                          |                                                         |                                                                                            |
| Anna                              | Williams   |                       |                  |             |                                          |                                                         |                                                                                            |
| Gemma                             | Williams   |                       |                  |             |                                          |                                                         |                                                                                            |
| Hannah                            | Williams   |                       |                  |             |                                          |                                                         |                                                                                            |
| James D                           | Williams   |                       |                  |             |                                          |                                                         |                                                                                            |
| Jayne                             | Williams   |                       |                  |             |                                          |                                                         |                                                                                            |
| Karen                             | Williams   |                       |                  |             |                                          |                                                         |                                                                                            |
| Penny                             | Williams   |                       |                  |             |                                          |                                                         |                                                                                            |
| Sarah                             | Williams   |                       |                  |             |                                          |                                                         |                                                                                            |

Supplemental Online Content: Nonauthor Collaborators

\*Indicates required information. Only first name, last name, and suffix will appear in PubMed.

| *First Name and Middle Initial(s) | *Last Name | *Suffix (eg, Jr, III) | Academic Degrees | Institution | Location (city, state/province, country) | Role or Contribution, eg, chair, principal investigator | Group (if more than 1 Group listed in the byline and/or Subgroup (eg, Steering Committee) |
|-----------------------------------|------------|-----------------------|------------------|-------------|------------------------------------------|---------------------------------------------------------|-------------------------------------------------------------------------------------------|
| Virginie                          | Williams   |                       |                  |             |                                          |                                                         |                                                                                           |
| Dawn                              | Williamson |                       |                  |             |                                          |                                                         |                                                                                           |
| James D                           | Williamson |                       |                  |             |                                          |                                                         |                                                                                           |
| Bruce                             | Willian    |                       |                  |             |                                          |                                                         |                                                                                           |
| Joanna                            | Willis     |                       |                  |             |                                          |                                                         |                                                                                           |
| Jayne                             | Willson    |                       |                  |             |                                          |                                                         |                                                                                           |
| Anna                              | Wilson     |                       |                  |             |                                          |                                                         |                                                                                           |
| Catherine                         | Wilson     |                       |                  |             |                                          |                                                         |                                                                                           |
| Maggie                            | Wilson     |                       |                  |             |                                          |                                                         |                                                                                           |
| Matthew                           | Wilson     |                       |                  |             |                                          |                                                         |                                                                                           |
| Evie                              | Wiltsher   |                       |                  |             |                                          |                                                         |                                                                                           |
| Phillip                           | Windrum    |                       |                  |             |                                          |                                                         |                                                                                           |
| Pascal                            | Winter     |                       |                  |             |                                          |                                                         |                                                                                           |
| Matt                              | Wise       |                       |                  |             |                                          |                                                         |                                                                                           |
| Mary Kay                          | Wisniewski |                       |                  |             |                                          |                                                         |                                                                                           |
| Holly                             | Wissett    |                       |                  |             |                                          |                                                         |                                                                                           |
| Katelyn                           | Witherell  |                       |                  |             |                                          |                                                         |                                                                                           |
| Amy                               | Woelke     |                       |                  |             |                                          |                                                         |                                                                                           |
| Paula                             | Wojcik     |                       |                  |             |                                          |                                                         |                                                                                           |
| Magda                             | Wolna      |                       |                  |             |                                          |                                                         |                                                                                           |
| Carol                             | Wong       |                       |                  |             |                                          |                                                         |                                                                                           |
| Lee                               | Wong       |                       |                  |             |                                          |                                                         |                                                                                           |
| Onyee                             | Wong       |                       |                  |             |                                          |                                                         |                                                                                           |
| Yun Man                           | Wong       |                       |                  |             |                                          |                                                         |                                                                                           |
| Carrie Anne                       | Wood       |                       |                  |             |                                          |                                                         |                                                                                           |
| Hannah                            | Wood       |                       |                  |             |                                          |                                                         |                                                                                           |
| Heidi                             | Wood       |                       |                  |             |                                          |                                                         |                                                                                           |
| Kathryn                           | Wood       |                       |                  |             |                                          |                                                         |                                                                                           |
| Tracy                             | Wood       |                       |                  |             |                                          |                                                         |                                                                                           |
| Julia                             | Woodford   |                       |                  |             |                                          |                                                         |                                                                                           |
| Luke                              | Woodford   |                       |                  |             |                                          |                                                         |                                                                                           |

Supplemental Online Content: Nonauthor Collaborators

\*Indicates required information. Only first name, last name, and suffix will appear in PubMed.

| *First Name and Middle Initial(s) | *Last Name | *Suffix (eg, Jr, III) | Academic Degrees | Institution | Location (city, state/province, country) | Role or Contribution, eg, chair, principal investigator | Group (if more than 1 Group listed in the byline and/or Subgroup (eg, Steering Committee)) |
|-----------------------------------|------------|-----------------------|------------------|-------------|------------------------------------------|---------------------------------------------------------|--------------------------------------------------------------------------------------------|
| Ursula                            | Woodford   |                       |                  |             |                                          |                                                         |                                                                                            |
| Debra                             | Woods      |                       |                  |             |                                          |                                                         |                                                                                            |
| Jane                              | Woods      |                       |                  |             |                                          |                                                         |                                                                                            |
| Lindsey                           | Woods      |                       |                  |             |                                          |                                                         |                                                                                            |
| Sheila                            | Wowchuk    |                       |                  |             |                                          |                                                         |                                                                                            |
| Sarah                             | Woycik     |                       |                  |             |                                          |                                                         |                                                                                            |
| Jess                              | Wren       |                       |                  |             |                                          |                                                         |                                                                                            |
| Joanne                            | Wren       |                       |                  |             |                                          |                                                         |                                                                                            |
| Lynn                              | Wren       |                       |                  |             |                                          |                                                         |                                                                                            |
| Caroline                          | Wrey Brown |                       |                  |             |                                          |                                                         |                                                                                            |
| Alison                            | Wright     |                       |                  |             |                                          |                                                         |                                                                                            |
| Chris                             | Wright     |                       |                  |             |                                          |                                                         |                                                                                            |
| Lee                               | Wright     |                       |                  |             |                                          |                                                         |                                                                                            |
| Peter                             | Wright     |                       |                  |             |                                          |                                                         |                                                                                            |
| Rebecca                           | Wright     |                       |                  |             |                                          |                                                         |                                                                                            |
| Julie                             | Wu         |                       |                  |             |                                          |                                                         |                                                                                            |
| Rachel                            | Wyatt      |                       |                  |             |                                          |                                                         |                                                                                            |
| Katharine                         | Wylie      |                       |                  |             |                                          |                                                         |                                                                                            |
| Kugan                             | Xavier     |                       |                  |             |                                          |                                                         |                                                                                            |
| Charlotte                         | Xia Le Tai |                       |                  |             |                                          |                                                         |                                                                                            |
| Huiyuan                           | Xiao       |                       |                  |             |                                          |                                                         |                                                                                            |
| Yang                              | Yang       |                       |                  |             |                                          |                                                         |                                                                                            |
| Elizabeth                         | Yarad      |                       |                  |             |                                          |                                                         |                                                                                            |
| David                             | Yates      |                       |                  |             |                                          |                                                         |                                                                                            |
| Donald                            | Yealy      |                       |                  |             |                                          |                                                         |                                                                                            |
| Andrew                            | Yeatman    |                       |                  |             |                                          |                                                         |                                                                                            |
| Patricia                          | Yedynak    |                       |                  |             |                                          |                                                         |                                                                                            |
| Ian                               | Young      |                       |                  |             |                                          |                                                         |                                                                                            |
| Meredith                          | Young      |                       |                  |             |                                          |                                                         |                                                                                            |
| Paul                              | Young      |                       |                  |             |                                          |                                                         |                                                                                            |
| Taryn                             | Youngstein |                       |                  |             |                                          |                                                         |                                                                                            |

Supplemental Online Content: Nonauthor Collaborators

\*Indicates required information. Only first name, last name, and suffix will appear in PubMed.

| *First Name and Middle Initial(s) | *Last Name                          | *Suffix (eg, Jr, III) | Academic Degrees | Institution | Location (city, state/province, country) | Role or Contribution, eg, chair, principal investigator | Group (if more than 1 Group listed in the byline) and/or Subgroup (eg, Steering Committee) |
|-----------------------------------|-------------------------------------|-----------------------|------------------|-------------|------------------------------------------|---------------------------------------------------------|--------------------------------------------------------------------------------------------|
| Haili                             | Yu                                  |                       |                  |             |                                          |                                                         |                                                                                            |
| Hakeem                            | Yusuff                              |                       |                  |             |                                          |                                                         |                                                                                            |
| Abbas                             | Zaidi                               |                       |                  |             |                                          |                                                         |                                                                                            |
| Ahmed                             | Zaki                                |                       |                  |             |                                          |                                                         |                                                                                            |
| Mohsin                            | Zaman                               |                       |                  |             |                                          |                                                         |                                                                                            |
| Raisa                             | Zaman                               |                       |                  |             |                                          |                                                         |                                                                                            |
| Claire                            | Zammit                              |                       |                  |             |                                          |                                                         |                                                                                            |
| Lynn                              | Zarb                                |                       |                  |             |                                          |                                                         |                                                                                            |
| Ryan                              | Zarychanski                         |                       |                  |             |                                          |                                                         |                                                                                            |
| Michelle                          | Zeller                              |                       |                  |             |                                          |                                                         |                                                                                            |
| Marian                            | Zelman                              |                       |                  |             |                                          |                                                         |                                                                                            |
| Anna                              | Zimperi                             |                       |                  |             |                                          |                                                         |                                                                                            |
| Dorota B                          | Ziortza Fernández de Pinedo Artaraz |                       |                  |             |                                          |                                                         |                                                                                            |
| Louisa                            | Zouita                              |                       |                  |             |                                          |                                                         |                                                                                            |
| Will                              | Zurbier                             |                       |                  |             |                                          |                                                         |                                                                                            |
| Sheba                             | Zyengi                              |                       |                  |             |                                          |                                                         |                                                                                            |
