# Supplementary material
Source: PubMed Central journal article supplement (PMC8491132)
Supplement: jama-e2118178-s006.pdf [file jama-e2118178-s006.pdf]

## Data Sharing Statement

Estcourt. Effect of Convalescent Plasma on Organ Support-Free Days in Critically Ill Patients With COVID-19. *JAMA*. Published October 04, 2021. doi:10.1001/jama.2021.18178

### Data

**Data available:** Yes

**Data types:** Deidentified participant data, Data dictionary

**How to access data:** Data will be available to researchers on request subject to sponsor restrictions. Requests for data from [info@remapcap.org](mailto:info@remapcap.org)

**When available:** beginning date: 02-01-2022, end date: 01-01-2027

### Supporting Documents

**Document types:** None

### Additional Information

**Who can access the data:** Data will be available to researchers on request subject to sponsor restrictions

**Types of analyses:** Research

**Mechanisms of data availability:** After approval of a proposal, with investigator support
